# Supplementary material for: Dissecting Anion Effects in Gold(I)-Catalyzed Intermolecular Cycloadditions
Source: PubMed Central journal article supplement — Adv Synth Catal. 2014 Jan 13;356(1):221–8. doi: 10.1002/adsc.201300704 (PMC4498468; doi:10.1002/adsc.201300704), 2014-01-13
Supplement: adsc0356-0221-sd1.pdf [file adsc0356-0221-sd1.pdf]



*Advanced*  
**Synthesis &  
Catalysis**

Supporting Information

© Copyright Wiley-VCH Verlag GmbH & Co. KGaA, 69451 Weinheim, 2013

Supporting Information

**Dissecting Anion Effects in Gold(I)-Catalyzed Intermolecular  
Cycloadditions**

Anna Homs, Carla Obradors, David Lebœuf and Antonio Echavarren\*

*Institute of Chemical Research of Catalonia (ICIQ), Tarragona, Spain*

E-mail: [aechavarren@iciq.es](mailto:aechavarren@iciq.es)

**Supporting Information**

## Table of Contents

|                                                                 |    |
|-----------------------------------------------------------------|----|
| 1. General Information                                          | 3  |
| 2. Synthesis of Gold(I) Complexes                               | 5  |
| 3. General Procedure for the Preparation of Cyclobutenes        | 12 |
| 4. Procedure for the Macrocyclization Reaction                  | 17 |
| 5. General Procedure for the Preparation of [3.2.1]-Oxabicycles | 17 |
| 6. Mechanistic Study                                            |    |
| Order of the reagents                                           | 18 |
| Kinetics                                                        | 20 |
| Equilibrium Constants                                           | 21 |
| Low temperature NMR experiments                                 | 25 |
| Electron density Surfaces                                       | 26 |
| Additional Experiments                                          | 27 |
| 7. X-Ray Crystallographic Data                                  | 30 |
| 8. NMR Spectra                                                  | 34 |
| 9. DFT's Data                                                   | 59 |

## 1. General Information

Unless otherwise stated, reactions were carried out under argon atmosphere in solvents dried by passing through an activated alumina column on a PureSolv™ solvent purification system (Innovative Technologies, Inc., MA). Analytical thin layer chromatography was carried out using TLC-aluminium sheets with 0.2 mm of silica gel (Merck GF<sub>234</sub>) using UV light as the visualizing agent and an acidic solution of vanillin in ethanol as the developing agent. Chromatography purifications were carried out using flash grade silica gel (SDS Chromatogel 60 ACC, 40-60 mm) or automated flash chromatographer CombiFlash Companion. Preparative TLC was performed on 20 cm × 20 cm silica gel plates (2.0 mm thick, catalogue number 02015, Analtech). If indicated, preparative TLC was performed on 20 cm x 20 cm aluminum oxide plates (0.25 mm thick, 90066, Fluka). Organic solutions were concentrated under reduced pressure on a Büchi rotary evaporator.

NMR spectra was recorded at 298 K on a Bruker Avance 400 Ultrashield and Bruker Avance 500 Ultrashield apparatus. Mass spectra was recorded on a Waters Micromass LCT Premier (ESI), Waters Micromass GCT (EI, CI) and Bruker Daltonics Autoflex (MALDI) spectrometers. Elemental analyses were performed on a LECO CHNS 932 micro-analyzer at the Universidad Complutense de Madrid. Melting points were determined using a Büchi melting point apparatus and are uncorrected.

Crystal structure determinations were carried out using a Bruker-Nonius diffractometer equipped with an APPEX 2 4K CCD area detector, a FR591 rotating anode with MoK<sub>a</sub> radiation, Montel mirrors as monochromator and a Kryoflex low temperature device (T = -173 °C). Full-sphere data collection was used with  $\omega$  and  $\phi$  scans. *Programs used:* Data collection APEX-2, data reduction Bruker Saint V/.60A and absorption correction SADABS. Structure Solution and Refinement: Crystal structure solution was achieved using direct methods as implement in SHELXTL and visualized using the program XP. Missing atoms were subsequently located from difference Fourier synthesis and added to the atom list. Least-squares refinement on F<sub>2</sub> using all measured intensities was carried out using the program SHELXTL. All non-hydrogen atoms were refined including anisotropic displacement parameters.

Alkynes, alkenes, 5-methylhex-5-en-2-one as well as the silver salts, sodium tetrakis[3,5-bis(trifluoromethyl)phenyl] borate and catalyst **A1** were used as received

from Alfa Aesar or Aldrich. Alkene **2f**<sup>1</sup> and 1,4-enyne **10**<sup>2</sup> were prepared according to the described procedure. Catalysts **B1**<sup>3</sup>, **B2**<sup>4</sup> and {phenylethynyl [(2',4',6'-triisopropyl-1,1'-biphenyl-2-yl) di-*tert*-butylphosphine] gold(I)} [(2',4',6'-triisopropyl-1,1'-biphenyl-2-yl) di-*tert*-butylphosphine] gold(I) hexafluoroantimonate<sup>5</sup> were prepared according to the literature too.

- 
- [1] T.B. Durham, N. Blanchard, B.M. Savall, N.A. Powell, W.R. Roush, *J. Am. Chem. Soc.* **2004**, *126*, 9307-9317.
- [2] C. Obradors, D. Lebœuf, J. Aydin, A. M. Echavarren, *Org. Lett.* **2013**, DOI: 10.1021/ol400358f.
- [3] C. H. M. Amijs, V. López-Carrillo, M. Raducan, P. Pérez-Galán, C. Ferrer, A. M. Echavarren, *J. Org. Chem.* **2008**, *73*, 7721-7730.
- [4] N. Huguet, D. Lebœuf, A. M. Echavarren, *Chem. Eur. J.* **2013**, DOI: 10.1002/chem.201300646.
- [5] C. Obradors, A. M. Echavarren, *Chem. Eur. J.* **2013**, *19*, 3547–3551.

## 2. Synthesis of Gold(I) Complexes

### (Acetonitrile)[(2',4',6'-triisopropyl-1,1'-biphenyl-2-yl)di-*tert*-butylphosphine]gold(I) tetrakis[3,5-bis(trifluoromethyl)phenyl] borate (A2)

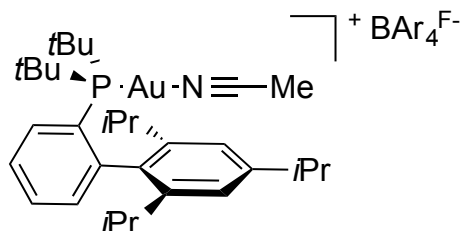

Chloro[(2',4',6'-triisopropyl-1,1'-biphenyl-2-yl)di-*tert*-butylphosphine]gold(I) (100.0 mg, 0.152 mmol) and acetonitrile (9.5  $\mu$ l, 0.183 mmol) were dissolved in CH<sub>2</sub>Cl<sub>2</sub> (6.6 ml). Then, sodium tetrakis[3,5-bis(trifluoromethyl)phenyl] borate (135.0 mg, 0.152 mmol) was added and the reaction mixture was stirred at room temperature for 30 min. The crude was filtered through Celite and concentrated. Finally, it was filtered through Teflon 0.22 and washed with CH<sub>2</sub>Cl<sub>2</sub>. The solvent was removed to afford a white powder (224.3 mg, 0.147 mmol, 97%).

<sup>1</sup>H NMR (400 MHz, CD<sub>2</sub>Cl<sub>2</sub>):  $\delta$  (ppm) 7.92 – 7.85 (m, 1H), 7.75 – 7.70 (m, 8H), 7.66 – 7.58 (m, 2H), 7.56 (s, 4H), 7.32 (m, 1H), 7.16 (s, 2H), 2.94 (p,  $J$  = 6.9 Hz, 1H), 2.33 (dt,  $J$  = 13.4, 6.7 Hz, 2H), 2.25 (broad s, 3H), 1.41 (d,  $J$  = 16.3 Hz, 18H), 1.32 (d,  $J$  = 6.9 Hz, 6H), 1.25 (d,  $J$  = 6.8 Hz, 6H), 0.93 (d,  $J$  = 6.6 Hz, 6H). <sup>13</sup>C NMR (101 MHz, CD<sub>2</sub>Cl<sub>2</sub>):  $\delta$  (ppm) 162.3 (q,  $J$  (<sup>13</sup>C-<sup>11</sup>B) = 50.1 Hz), 150.4, 148.0, 147.6 (d,  $J$  (<sup>13</sup>C-<sup>31</sup>P) = 12.8 Hz), 136.7 (d,  $J$  (<sup>13</sup>C-<sup>31</sup>P) = 6.1 Hz), 135.5, 135.4, 134.7 (d,  $J$  (<sup>13</sup>C-<sup>31</sup>P) = 4.6 Hz), 132.1 (d,  $J$  (<sup>13</sup>C-<sup>31</sup>P) = 2.6 Hz), 129.5 (q,  $J$  (<sup>13</sup>C-<sup>19</sup>F) = 28.6 Hz), 128.1 (d,  $J$  (<sup>13</sup>C-<sup>31</sup>P) = 8.1 Hz), 126.0 (d,  $J$  (<sup>13</sup>C-<sup>31</sup>P) = 50.2 Hz), 125.2 (q,  $J$  (<sup>13</sup>C-<sup>19</sup>F) = 272.3 Hz), 122.5, 118.1 (p,  $J$  (<sup>13</sup>C-<sup>19</sup>F) = 4.0 Hz), 39.2 (d,  $J$  (<sup>13</sup>C-<sup>31</sup>P) = 29.3 Hz), 34.6, 31.5 (d,  $J$  (<sup>13</sup>C-<sup>31</sup>P) = 4.3 Hz), 31.5, 26.3, 24.5, 23.4, 3.3 and one carbon is missing probably because of overlapping. <sup>31</sup>P {<sup>1</sup>H} NMR (162 MHz, CD<sub>2</sub>Cl<sub>2</sub>):  $\delta$  (ppm) 58.68. <sup>19</sup>F {<sup>1</sup>H} NMR (376 MHz, CD<sub>2</sub>Cl<sub>2</sub>):  $\delta$  (ppm) -62.97. <sup>11</sup>B {<sup>1</sup>H} NMR (128 MHz, CD<sub>2</sub>Cl<sub>2</sub>):  $\delta$  (ppm) -6.68. MALDI<sup>+</sup>:  $m/z$  calcd for C<sub>31</sub>H<sub>48</sub>AuNP<sup>+</sup> [M-C<sub>32</sub>H<sub>12</sub>BF<sub>24</sub>]<sup>+</sup>: 662.3175, found: 662.3184. Anal. calcd for C<sub>63</sub>H<sub>60</sub>AuBF<sub>24</sub>NP: C, 49.59; H, 3.97; N, 0.92; found: C, 49.56; H, 3.94; N, 0.97.

**(Acetonitrile)[(2',4',6'-triisopropyl-1,1'-biphenyl-2-yl)di-tert-butylphosphine]gold(I) tetrafluoroborate (A3)**

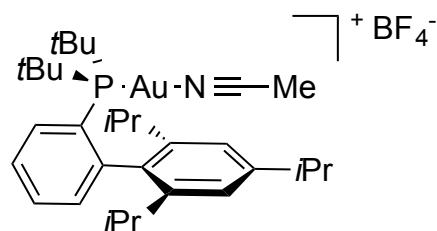

Chloro[(2',4',6'-triisopropyl-1,1'-biphenyl-2-yl)di-tert-butylphosphine]gold(I) (100.0 mg, 0.152 mmol) and acetonitrile (9.5  $\mu$ l, 0.183 mmol) were dissolved in CH<sub>2</sub>Cl<sub>2</sub> (6.6 ml). Then, silver tetrafluoroborate (29.6 mg, 0.152 mmol) was added and the reaction mixture was stirred at room temperature for 20 min. The crude was filtered through and concentrated. Finally, it was filtered through Teflon 0.22 and washed with CH<sub>2</sub>Cl<sub>2</sub>. The solvent was removed to afford a white powder (113.9 mg, 0.152 mmol, 100%).

<sup>1</sup>H NMR (400 MHz, CD<sub>2</sub>Cl<sub>2</sub>):  $\delta$  (ppm) 7.90 (td,  $J$  = 8.9, 8.1, 2.3 Hz, 1H), 7.69 – 7.54 (m, 2H), 7.32 (ddd,  $J$  = 6.9, 4.9, 2.5 Hz, 1H), 7.17 (s, 2H), 2.97 (hept,  $J$  = 6.8 Hz, 1H), 2.39 (s, 3H), 2.33 (hept,  $J$  = 6.7 Hz, 2H), 1.43 (d,  $J$  = 16.3 Hz, 18H), 1.33 (d,  $J$  = 6.9 Hz, 6H), 1.27 (d,  $J$  = 6.8 Hz, 6H), 0.93 (d,  $J$  = 6.6 Hz, 6H). <sup>13</sup>C NMR (101 MHz, CD<sub>2</sub>Cl<sub>2</sub>):  $\delta$  (ppm) 150.5, 147.8, 147.7 (d,  $J$  (<sup>13</sup>C-<sup>31</sup>P) = 12.7 Hz), 136.6 (d,  $J$  (<sup>13</sup>C-<sup>31</sup>P) = 6.0 Hz), 135.4 (d,  $J$  (<sup>13</sup>C-<sup>31</sup>P) = 8.1 Hz), 134.8 (d,  $J$  (<sup>13</sup>C-<sup>31</sup>P) = 4.3 Hz), 132.0, 128.0 (d,  $J$  (<sup>13</sup>C-<sup>31</sup>P) = 7.8 Hz), 126.3 (d,  $J$  (<sup>13</sup>C-<sup>31</sup>P) = 47.8 Hz), 122.5, 120.0 (d,  $J$  (<sup>13</sup>C-<sup>31</sup>P) = 4.4 Hz), 39.2 (d,  $J$  (<sup>13</sup>C-<sup>31</sup>P) = 28.2 Hz), 34.5, 31.6 (d,  $J$  (<sup>13</sup>C-<sup>31</sup>P) = 5.8 Hz), 31.5, 26.4, 24.5, 23.4, 3.3. <sup>31</sup>P {<sup>1</sup>H} NMR (162 MHz, CD<sub>2</sub>Cl<sub>2</sub>):  $\delta$  (ppm) 58.58. <sup>19</sup>F {<sup>1</sup>H} NMR (376 MHz, CD<sub>2</sub>Cl<sub>2</sub>):  $\delta$  (ppm) -153.10. <sup>11</sup>B {<sup>1</sup>H} NMR (128 MHz, CD<sub>2</sub>Cl<sub>2</sub>):  $\delta$  (ppm) -1.23. MALDI<sup>+</sup>:  $m/z$  calcd for C<sub>31</sub>H<sub>48</sub>AuNP<sup>+</sup> [M-BF<sub>4</sub>]<sup>+</sup>: 662.3184, found: 662.3180. Anal. calcd for C<sub>63</sub>H<sub>60</sub>AuBF<sub>24</sub>NP: C, 49.68; H, 6.46; N, 1.87; found: C, 48.89; H, 6.20; N, 1.64.

**(Acetonitrile)[(2',4',6'-triisopropyl-1,1'-biphenyl-2-yl)di-tert-butylphosphine]gold(I) hexafluorophosphate (A4)**

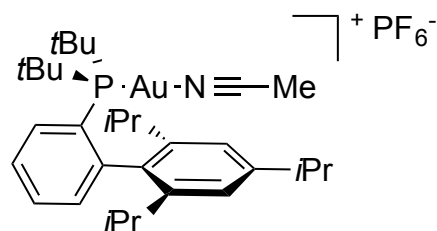

Chloro[(2',4',6'-triisopropyl-1,1'-biphenyl-2-yl)di-tert-butylphosphine]gold(I) (350.0 mg, 0.533 mmol) and acetonitrile (33.0  $\mu$ l, 0.639 mmol) were dissolved in CH<sub>2</sub>Cl<sub>2</sub> (23 ml). Then, silver hexafluorophosphate (135.0 mg, 0.533 mmol) was added and the reaction mixture was stirred at room temperature for 20 min. The crude was filtered through Celite and concentrated. Finally, it was filtered through Teflon 0.22 and washed with CH<sub>2</sub>Cl<sub>2</sub>. The solvent was removed to afford a white powder (221.0 mg, 0.274 mmol, 51%).

<sup>1</sup>H NMR (400 MHz, CD<sub>2</sub>Cl<sub>2</sub>):  $\delta$  (ppm) 7.90 (ddd,  $J$  = 9.0, 7.1, 2.2 Hz, 1H), 7.60 (dq,  $J$  = 7.1, 2.0 Hz, 2H), 7.33 (td,  $J$  = 6.6, 5.7, 3.2 Hz, 1H), 7.17 (s, 1H), 2.95 (hept,  $J$  = 6.9 Hz, 1H), 2.38 – 2.27 (m, 4H), 1.43 (d,  $J$  = 16.3 Hz, 18H), 1.33 (d,  $J$  = 6.9 Hz, 6H), 1.27 (d,  $J$  = 6.7 Hz, 6H), 0.93 (d,  $J$  = 6.6 Hz, 6H). <sup>13</sup>C NMR (101 MHz, CD<sub>2</sub>Cl<sub>2</sub>):  $\delta$  (ppm) 149.9, 147.8, 136.6 (d,  $J$  (<sup>13</sup>C-<sup>31</sup>P) = 7.1 Hz), 135.3 (d,  $J$  (<sup>13</sup>C-<sup>31</sup>P) = 9.3 Hz), 134.8 (d,  $J$  (<sup>13</sup>C-<sup>31</sup>P) = 4.2 Hz), 132.0, 128.0 (d,  $J$  (<sup>13</sup>C-<sup>31</sup>P) = 7.2 Hz), 122.4, 117.9, 39.2 (d,  $J$  (<sup>13</sup>C-<sup>31</sup>P) = 29.2 Hz), 34.55, 31.56 (d,  $J$  = 5.6 Hz), 26.35, 24.47, 23.39, 3.23. Two signals are missing due to overlapping. <sup>31</sup>P {<sup>1</sup>H} NMR (162 MHz, CD<sub>2</sub>Cl<sub>2</sub>):  $\delta$  (ppm) 58.53, -139.23 (hept,  $J$  (<sup>31</sup>P-<sup>19</sup>F) = 715.0 Hz). <sup>19</sup>F {<sup>1</sup>H} NMR (376 MHz, CD<sub>2</sub>Cl<sub>2</sub>):  $\delta$  (ppm) -73.46 (d,  $J$  (<sup>19</sup>F-<sup>31</sup>P) = 710.3 Hz). ESI<sup>+</sup>:  $m/z$  calcd for C<sub>31</sub>H<sub>48</sub>AuNP<sup>+</sup> [M-PF<sub>6</sub>]<sup>+</sup>: 662.3184, found: 662.3176.



**[(2',4',6'-Triisopropyl-1,1'-biphenyl-2-yl)di-*tert*-butylphosphine](2-phenylethynyl)gold(I) (16)**

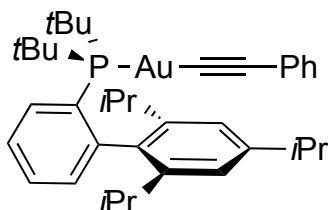

Lithium bis(trimethylsilyl)amide (53.5 mg, 0.320 mmol) was dissolved in THF (4.0 ml) and cooled to 0 °C. Ethynylbenzene (35.1  $\mu$ l, 0.320 mmol) was added and the solution was stirred for 30 min. Afterwards, chloro[(2',4',6'-triisopropyl-1,1'-biphenyl-2-yl)di-*tert*-butylphosphine]gold(I) (200.0 mg, 0.304 mmol) dissolved in THF (3.0 ml) was added and the solution was stirred overnight at room temperature. The crude was concentrated, dissolved in CH<sub>2</sub>Cl<sub>2</sub> and filtered through Teflon 0.22. The solvent was removed to afford a white powder (219.0 mg, 0.303 mmol, 99%).

<sup>1</sup>H NMR (500 MHz, CD<sub>2</sub>Cl<sub>2</sub>):  $\delta$  (ppm) 7.92 (td,  $J = 7.4, 1.8$  Hz, 1H), 7.53 – 7.46 (m, 2H), 7.30 – 7.28 (m, 3H), 7.21 – 7.18 (m, 2H), 7.15 – 7.12 (m, 3H), 2.93 (p,  $J = 6.9$  Hz, 1H), 2.40 (p,  $J = 6.7$  Hz, 2H), 1.43 (d,  $J = 14.8$  Hz, 18H), 1.36 (d,  $J = 6.8$  Hz, 6H), 1.27 (d,  $J = 6.9$  Hz, 6H), 0.92 (d,  $J = 6.7$  Hz, 6H). <sup>13</sup>C NMR (126 MHz, CD<sub>2</sub>Cl<sub>2</sub>):  $\delta$  (ppm) 150.0, 148.7 (d,  $J(^{13}\text{C}-^{31}\text{P}) = 15.6$  Hz), 146.4, 137.3 (d,  $J(^{13}\text{C}-^{31}\text{P}) = 133.1$  Hz), 136.6 (d,  $J(^{13}\text{C}-^{31}\text{P}) = 5.1$  Hz), 136.1 (d,  $J(^{13}\text{C}-^{31}\text{P}) = 1.6$  Hz), 135.2 (d,  $J(^{13}\text{C}-^{31}\text{P}) = 7.9$  Hz), 132.2, 130.4 (d,  $J(^{13}\text{C}-^{31}\text{P}) = 2.2$  Hz), 129.9 (d,  $J(^{13}\text{C}-^{31}\text{P}) = 37.0$  Hz), 128.3, 127.4 (d,  $J(^{13}\text{C}-^{31}\text{P}) = 2.7$  Hz), 126.9 (d,  $J(^{13}\text{C}-^{31}\text{P}) = 6.0$  Hz), 126.0, 122.3, 101.5 (d,  $J(^{13}\text{C}-^{31}\text{P}) = 23.9$  Hz), 38.5 (d,  $J(^{13}\text{C}-^{31}\text{P}) = 23.2$  Hz), 34.5, 31.7 (d,  $J(^{13}\text{C}-^{31}\text{P}) = 6.8$  Hz), 31.4, 26.5, 24.4, 23.2. <sup>31</sup>P {<sup>1</sup>H} NMR (202 MHz, CD<sub>2</sub>Cl<sub>2</sub>):  $\delta$  (ppm) 66.89. MALDI<sup>+</sup>:  $m/z$  calcd for C<sub>37</sub>H<sub>50</sub>AuPNa<sup>+</sup> [M+Na]<sup>+</sup>: 745.3208, found: 745.3216. Structure confirmed by X-ray crystallography: CCDC 953709.

**( $\alpha$ -Methylstyrene)[(2',4',6'-triisopropyl-1,1'-biphenyl-2-yl)di-*tert*-butylphosphine]gold(I) tetrakis[3,5-bis(trifluoromethyl)phenyl] borate (15b)**

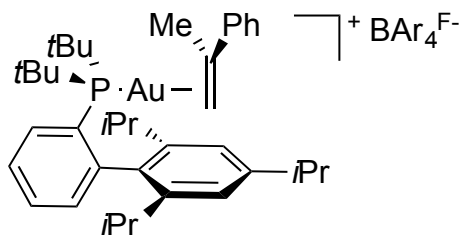

Chloro[(2',4',6'-triisopropyl-1,1'-biphenyl-2-yl)di-*tert*-butylphosphine]gold(I) (100.0 mg, 0.152 mmol) and  $\alpha$ -methylstyrene (30.0  $\mu$ l, 0.228 mmol) were dissolved in  $\text{CH}_2\text{Cl}_2$  (10.0 ml). Then, sodium tetrakis[3,5-bis(trifluoromethyl)phenyl] borate (135.0 mg, 0.152 mmol) was added and the reaction mixture was stirred at room temperature for 30 min. The crude was filtered through Celite and concentrated. Finally, it was filtered through Teflon 0.22 and washed with  $\text{CH}_2\text{Cl}_2$ . The solvent was removed to afford a white powder (210.4 mg, 0.131 mmol, 86%).

$^1\text{H}$  NMR (400 MHz,  $\text{CD}_2\text{Cl}_2$ , 298 K):  $\delta$  (ppm) 7.82 (td,  $J = 7.8, 1.6$  Hz, 1H), 7.76 – 7.70 (m, 8H), 7.63 – 7.53 (m, 6H), 7.50 – 7.39 (m, 5H), 7.29 (s, 2H), 7.21 (ddd,  $J = 7.3, 3.7, 1.7$  Hz, 1H), 4.27 (dd,  $J = 4.5, 0.8$  Hz, 1H), 3.95 (d,  $J = 4.5$  Hz, 1H), 3.12 (p,  $J = 6.9$  Hz, 1H), 2.50 (s, 3H), 2.42 – 2.19 (m, 2H), 1.43 (d,  $J = 6.9$  Hz, 6H), 1.39 – 1.03 (m, 24H), 0.92 (d,  $J = 6.6$  Hz, 6H).  $^{13}\text{C}$  NMR (101 MHz,  $\text{CD}_2\text{Cl}_2$ , 213 K): it was not possible to properly assign all the signals due to the broadening of some peaks because of the weak coordination of the metal to the alkene combined with the complexity of the heterocouplings with  $^{31}\text{P}$ ,  $^{19}\text{F}$  and  $^{11}\text{B}$   $\delta$  (ppm) 162.95, 162.55, 162.16, 161.76, 155.99, 151.76, 149.09, 147.08, 146.97, 135.95, 135.75, 135.47, 135.32, 135.04, 133.40, 132.93, 132.61, 132.26, 130.29, 129.79, 129.61, 129.36, 129.07, 128.44, 127.14, 126.67, 126.27, 124.11, 123.63, 123.12, 121.94, 118.55, 118.21, 117.88, 117.55, 89.01, 88.68, 38.61, 38.41, 34.76, 31.64, 31.42, 31.11, 26.27, 26.04, 25.90, 25.02, 24.82, 24.64, 24.45, 23.82.  $^{31}\text{P}$   $\{^1\text{H}\}$  NMR (162 MHz,  $\text{CD}_2\text{Cl}_2$ , 298 K):  $\delta$  (ppm) 69.34.  $^{19}\text{F}$   $\{^1\text{H}\}$  NMR (376 MHz,  $\text{CD}_2\text{Cl}_2$ , 298 K):  $\delta$  (ppm) -62.83.  $^{11}\text{B}$   $\{^1\text{H}\}$  NMR (128 MHz,  $\text{CD}_2\text{Cl}_2$ , 298 K):  $\delta$  (ppm) -6.67.  $\text{ESI}^+$ :  $m/z$  calcd for  $\text{C}_{29}\text{H}_{45}\text{AuP}^+ [\text{M}-\text{C}_{31}\text{H}_{22}\text{BF}_{24}]^+$ : 621.2919, found: 621.2916. Structure confirmed by X-ray crystallography: CCDC 953708.

**{Phenylethynyl}[(2',4',6'-triisopropyl-1,1'-biphenyl-2-yl)di-tert-butylphosphine]gold(I)**

**[(2',4',6'-triisopropyl-1,1'-biphenyl-2-yl)di-tert-butylphosphine]gold(I)  
tetrakis[3,5-bis(trifluoromethyl)phenyl] borate (9b)**

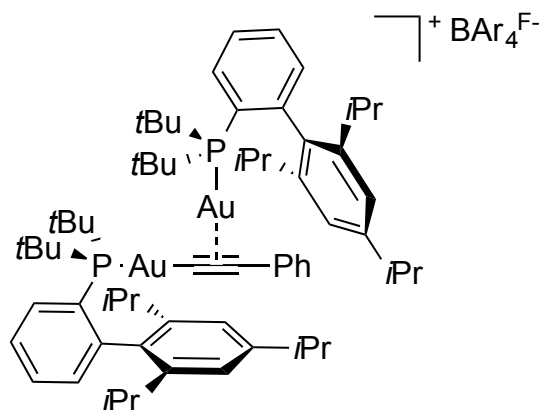

Chloro[(2',4',6'-triisopropyl-1,1'-biphenyl-2-yl)di-tert-butylphosphine]gold(I) (68.2 mg, 0.104 mmol) and [(2',4',6'-triisopropyl-1,1'-biphenyl-2-yl)di-tert-butylphosphine](2-phenylethynyl)gold(I) (75 mg, 0.104 mmol) were dissolved in  $\text{CH}_2\text{Cl}_2$  (9.4 ml). Then, sodium tetrakis[3,5-bis(trifluoromethyl)phenyl] borate (92 mg, 0.104 mmol) was added and the reaction mixture was stirred at room temperature for 30 min. The crude was filtered through Celite and concentrated. Finally, it was filtered through Teflon 0.22 and washed with  $\text{CH}_2\text{Cl}_2$ . The solvent was removed to afford a white powder (223.0 mg, 0.101 mmol, 97%).

$^1\text{H}$  NMR (400 MHz,  $\text{CD}_2\text{Cl}_2$ ):  $\delta$  (ppm) 7.95 – 7.87 (m, 2H), 7.73 (dd,  $J = 4.2, 2.0$  Hz, 8H), 7.57 (broad s, 4H), 7.56 – 7.49 (m, 4H), 7.48 – 7.42 (m, 1H), 7.42 – 7.37 (m, 2H), 7.34 – 7.30 (m, 2H), 7.26 – 7.22 (m, 2H), 6.84 (s, 4H), 2.39 – 2.29 (m, 6H), 1.42 (d,  $J = 15.6$  Hz, 36H), 1.14 (d,  $J = 6.8$  Hz, 12H), 1.09 (d,  $J = 6.9$  Hz, 12H), 0.85 (d,  $J = 6.6$  Hz, 12H).  $^{13}\text{C}$  NMR (101 MHz,  $\text{CD}_2\text{Cl}_2$ ):  $\delta$  (ppm) 162.3 (q,  $J(^{13}\text{C}-^{11}\text{B}) = 50.0$  Hz), 150.0, 148.1 (d,  $J(^{13}\text{C}-^{31}\text{P}) = 14.3$  Hz), 147.1, 136.2 (d,  $J(^{13}\text{C}-^{31}\text{P}) = 5.6$  Hz), 135.5, 135.4, 135.0 (d,  $J(^{13}\text{C}-^{31}\text{P}) = 1.2$  Hz), 133.1, 131.4, 130.6, 130.0 – 129.0 (m), 129.0, 127.7 (d,  $J(^{13}\text{C}-^{31}\text{P}) = 42.5$  Hz), 127.6, 127.5, 125.2 (q,  $J(^{13}\text{C}-^{19}\text{F}) = 272.6$  Hz), 122.2, 121.3, 118.2 – 118.0 (m), 39.3 (d,  $J(^{13}\text{C}-^{31}\text{P}) = 24.6$  Hz), 34.0, 31.9 (d,  $J(^{13}\text{C}-^{31}\text{P}) = 6.8$  Hz), 31.4, 26.4, 24.3, 23.6 and one signal missing because of overlapping.  $^{31}\text{P}$   $\{^1\text{H}\}$  NMR (162 MHz,  $\text{CD}_2\text{Cl}_2$ ):  $\delta$  (ppm) 65.09.  $^{19}\text{F}$   $\{^1\text{H}\}$  NMR (376 MHz,  $\text{CD}_2\text{Cl}_2$ ):  $\delta$  (ppm) -62.95.  $^{11}\text{B}$   $\{^1\text{H}\}$  NMR (128 MHz,  $\text{CD}_2\text{Cl}_2$ ):  $\delta$  (ppm) -6.67.

MALDI<sup>+</sup>: *m/z* calcd for C<sub>66</sub>H<sub>95</sub>Au<sub>2</sub>P<sub>2</sub><sup>+</sup> [M-C<sub>32</sub>H<sub>12</sub>BF<sub>24</sub>]<sup>+</sup>: 1343.6235, found: 1343.5751. Structure confirmed by X-ray crystallography: CCDC 953710.

### 3. General Procedure for the Preparation of Cyclobutenes

Alkyne and alkene (2 equiv) were dissolved in dichloromethane (0.48 M) and the cationic gold (I) catalyst (3 mol%) was added. The reaction mixture was stirred at room temperature until no alkyne was observed by TLC. The reaction was quenched by adding a drop of a solution of Et<sub>3</sub>N in cyclohexane (1M) and the solvent was removed. Preparative TLC was used to purify the resulting cyclobutenes.

#### 1-Methoxy-3-(3-methyl-3-phenylcyclobut-1-en-1-yl)benzene (**3g**)

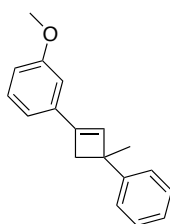

Cyclobutene **3g** was synthesized following the general procedure starting from 1-ethynyl-3-methoxybenzene (**1g**) (21  $\mu$ l, 0.169 mmol) and  $\alpha$ -methylstyrene (**2a**) (44  $\mu$ l, 0.338 mmol) with catalyst **A2** (7.7 mg, 0.05 mmol). The reaction time was 8 h and a mixture of pentane and diethyl ether (9:1) was used as eluent in the separation to obtain 33 mg (0.132 mmol) of **3g** as a colorless oil in 78% yield.

<sup>1</sup>H NMR (500 MHz, CDCl<sub>3</sub>)  $\delta$  7.47 – 7.43 (m, 2H), 7.40 – 7.35 (m, 2H), 7.33 – 7.28 (m, 1H), 7.25 (td,  $J$  = 7.2, 1.4 Hz, 1H), 7.05 (dt,  $J$  = 7.7, 1.2 Hz, 1H), 7.00 – 6.95 (m, 1H), 6.87 (dd,  $J$  = 7.8, 3.2 Hz, 1H), 6.78 (s, 1H), 3.87 (s, 3H), 3.02 (d,  $J$  = 12.7 Hz, 1H), 2.95 (d,  $J$  = 12.5 Hz, 1H), 1.68 (s, 3H). <sup>13</sup>C NMR (126 MHz, CDCl<sub>3</sub>)  $\delta$  159.83, 147.74, 143.86, 136.25, 134.28, 129.51, 128.26, 125.98, 125.83, 117.37, 113.77, 109.98, 55.37, 46.08, 44.46, 27.68. HRMS-APCI  $m/z$  calculated for C<sub>18</sub>H<sub>18</sub>O [M+H]<sup>+</sup> 251.1430, found 251.1434.

#### 1-Fluoro-3-(3-methyl-3-phenylcyclobut-1-en-1-yl)benzene (**3j**)

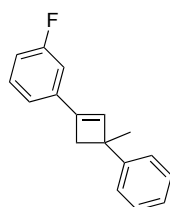

Cyclobutene **3j** was synthesized following the general procedure starting from 1-ethynyl-3-fluorobenzene (**1j**) (21  $\mu$ l, 0.169 mmol) and  $\alpha$ -methylstyrene (**2a**) (44  $\mu$ l,

0.338 mmol) with catalyst **A2** (7.7 mg, 0.05 mmol). The reaction time was 24 h and a mixture of pentane and diethyl ether (90:1) was used as eluent in the separation to obtain 31 mg (0.130 mmol) of **3j** as a yellowish oil in 77% yield.

$^1\text{H}$  NMR (500 MHz,  $\text{CDCl}_3$ )  $\delta$  7.40 – 7.35 (m, 2H), 7.34 – 7.29 (m, 2H), 7.29 – 7.24 (m, 1H), 7.21 – 7.17 (m, 1H), 7.14 (dt,  $J = 7.7, 1.2$  Hz, 1H), 7.05 (ddd,  $J = 9.8, 2.6, 1.5$  Hz, 1H), 6.94 (tdd,  $J = 8.3, 2.6, 1.0$  Hz, 1H), 6.75 (s, 1H), 2.95 (d,  $J = 12.6$  Hz, 1H), 2.88 (d,  $J = 12.5$  Hz, 1H), 1.62 (s, 1H).  $^{13}\text{C}$  NMR (126 MHz,  $\text{CDCl}_3$ )  $\delta$  163.17 (d,  $J = 245.8$  Hz), 147.45, 142.97 (d,  $J = 2.5$  Hz), 137.09 (d,  $J = 7.6$  Hz), 135.39, 129.99 (d,  $J = 8.3$  Hz), 128.32, 125.96, 125.94, 120.48 (d,  $J = 2.8$  Hz), 114.77 (d,  $J = 21.4$  Hz), 111.51 (d,  $J = 21.4$  Hz), 46.29, 44.34, 27.68. HRMS-APCI  $m/z$  calculated for  $\text{C}_{17}\text{H}_{15}\text{F}$   $[\text{M}+\text{H}]^+$  239.1234, found 239.1231.

### 1-Chloro-3-(3-methyl-3-phenylcyclobut-1-en-1-yl)benzene (**3k**)

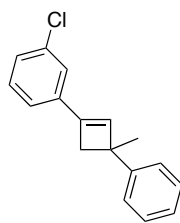

Cyclobutene **3k** was synthesized following the general procedure starting from 1-ethynyl-3-chlorobenzene (**1k**) (21  $\mu\text{l}$ , 0.169 mmol) and  $\alpha$ -methylstyrene (**2a**) (44  $\mu\text{l}$ , 0.338 mmol) with catalyst **A2** (7.7 mg, 0.05 mmol). The reaction time was 24 h and a mixture of pentane and diethyl ether (90:1) was used as eluent in the separation to obtain 36 mg (0.141 mmol) of **3k** as a yellowish oil in 83% yield.

$^1\text{H}$  NMR (500 MHz,  $\text{CDCl}_3$ )  $\delta$  7.40 – 7.35 (m, 3H), 7.35 – 7.30 (m, 2H), 7.27 – 7.17 (m, 4H), 6.77 (s, 1H), 2.96 (d,  $J = 12.5$  Hz, 1H), 2.89 (d,  $J = 12.5$  Hz, 1H), 1.63 (s, 3H).  $^{13}\text{C}$  NMR (126 MHz,  $\text{CDCl}_3$ )  $\delta$  147.39, 142.74, 136.61, 135.57, 134.55, 129.74, 128.32, 127.87, 125.94, 124.90, 122.86, 46.35, 44.31, 27.66. HRMS-APCI  $m/z$  calculated for  $\text{C}_{17}\text{H}_{15}\text{Cl}$   $[\text{M}+\text{H}]^+$  255.0935, found 255.0935.

### 1-Methoxy-3-(3-methyl-3-phenylcyclobut-1-en-1-yl)benzene (**3l**)

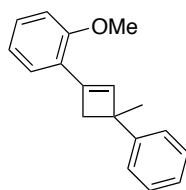

Cyclobutene **3l** was synthesized following the general procedure starting from 1-ethynyl-2-methoxybenzene (**1l**) (22  $\mu$ l, 0.169 mmol) and  $\alpha$ -methylstyrene (**2a**) (44  $\mu$ l, 0.338 mmol) with catalyst **A2** (7.7 mg, 0.05 mmol). The reaction time was 48 h and a mixture of pentane and diethyl ether (9:1) was used as eluent in the separation to obtain 11 mg (0.044 mmol) of **3l** as a colorless oil in 24% yield.

$^1\text{H}$  NMR (300 MHz,  $\text{CDCl}_3$ )  $\delta$  7.47 – 7.39 (m, 2H), 7.36 – 7.28 (m, 2H), 7.25 – 7.14 (m, 3H), 6.98 – 6.86 (m, 2H), 6.80 (s, 1H), 3.92 (s, 3H), 3.03 (d,  $J = 12.4$  Hz, 1H), 2.95 (d,  $J = 12.3$  Hz, 1H), 1.65 (s, 3H).  $^{13}\text{C}$  NMR (75 MHz,  $\text{CDCl}_3$ )  $\delta$  158.63, 148.22, 140.29, 138.70, 128.91, 128.19, 127.15, 126.04, 125.65, 123.58, 120.34, 110.50, 55.29, 46.88, 45.40, 27.86. HRMS-APCI  $m/z$  calculated for  $\text{C}_{18}\text{H}_{18}\text{O}$   $[\text{M}+\text{H}]^+$  251.1430, found 251.1433.

### 3-(3-Methyl-3-phenylcyclobut-1-en-1-yl)thiophene (**3m**)

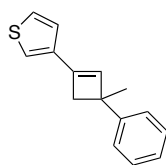

Cyclobutene **3m** was synthesized following the general procedure starting from 3-ethynylthiophene (**1m**) (17  $\mu$ l, 0.169 mmol) and  $\alpha$ -methylstyrene (**2a**) (44  $\mu$ l, 0.338 mmol) with catalyst **A2** (7.7 mg, 0.05 mmol). The reaction time was 24 h and a mixture of pentane and diethyl ether (90:1) was used as eluent in the separation to obtain 33 mg (0.146 mmol) of **3m** as a brownish oil in 86% yield.

$^1\text{H}$  NMR (500 MHz,  $\text{CDCl}_3$ )  $\delta$  7.43 – 7.39 (m, 2H), 7.36 – 7.31 (m, 2H), 7.30 (dd,  $J = 5.0, 2.9$  Hz, 1H), 7.23 – 7.19 (m, 2H), 7.17 (dd,  $J = 3.0, 1.2$  Hz, 1H), 6.51 (s, 1H), 2.97 (d,  $J = 12.5$  Hz, 1H), 2.91 (d,  $J = 12.4$  Hz, 1H), 1.65 (s, 3H).  $^{13}\text{C}$  NMR (126 MHz,  $\text{CDCl}_3$ )  $\delta$  147.83, 139.38, 137.87, 132.74, 128.25, 126.04, 125.95, 125.82, 125.13, 121.14, 47.17, 45.20, 27.75z. HRMS-APCI  $m/z$  calculated for  $\text{C}_{15}\text{H}_{14}\text{S}$   $[\text{M}+\text{H}]^+$  239.0889, found 239.0896.

### Triisopropyl((1-methyl-3-phenylcyclobut-2-en-1-yl)methyl)silane (**3q**)

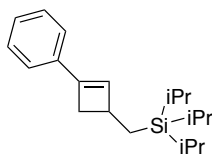

Cyclobutene **3q** was synthesized following the general procedure starting from phenylacetylene (**1a**) (19  $\mu$ l, 0.169 mmol) and allyltriisopropylsilane (**2d**) (81  $\mu$ l, 0.338 mmol) with catalyst **A2** (7.7 mg, 0.05 mmol). The reaction time was 72 h and a mixture of pentane 100% was used as eluent in the separation. **3q** was isolated as a colorless oil.

$^1\text{H}$  NMR (400 MHz, Chloroform-*d*)  $\delta$  7.38 – 7.28 (m, 4H), 7.25 – 7.20 (m, 1H), 6.39 (d,  $J$  = 1.1 Hz, 1H), 3.07 – 2.94 (m, 2H), 2.31 (dd,  $J$  = 12.4, 1.4 Hz, 1H), 1.08 (s, 23H).  $^{13}\text{C}$  NMR (101 MHz, Chloroform-*d*)  $\delta$  143.85, 135.24, 133.78, 128.41, 127.54, 124.48, 38.60, 35.50, 19.04, 15.31, 11.41. HRMS-APCI  $m/z$  calculated for  $\text{C}_{20}\text{H}_{32}\text{Si}$   $[\text{M}+\text{H}]^+$  301.2346, found 301.2352.

### (3-Methyl-3-(phenoxy)methyl)cyclobut-1-en-1-yl)benzene (**3r**)

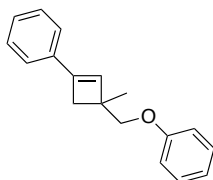

Cyclobutene **3r** was synthesized following the general procedure starting from phenylacetylene (**1a**) (19  $\mu$ l, 0.169 mmol) and ((2-methylallyl)oxy)benzene (**2e**) (52  $\mu$ l, 0.338 mmol) with catalyst **A2** (7.7 mg, 0.05 mmol). The reaction time was 72 h and a mixture of pentane and diethyl ether (20:1) was used as eluent in the separation in a preparative TLC in Alumina oxide. **3r** was isolated as a colorless oil.

$^1\text{H}$  NMR (500 MHz, Chloroform-*d*)  $\delta$  7.39 – 7.36 (m, 2H), 7.36 – 7.31 (m, 2H), 7.30 – 7.26 (m, 2H), 6.96 – 6.91 (m, 3H), 6.47 (s, 1H), 3.98 (d,  $J$  = 8.7 Hz, 1H), 3.95 (d,  $J$  = 8.7 Hz, 1H), 2.74 (d,  $J$  = 12.8 Hz, 1H), 2.56 (d,  $J$  = 12.8 Hz, 1H), 1.42 (s, 3H).  $^{13}\text{C}$  NMR (126 MHz, Chloroform-*d*)  $\delta$  159.62, 144.31, 134.84, 132.96, 129.52, 128.47, 128.00, 124.70, 120.66, 114.79, 75.46, 42.91, 38.91, 21.79. HRMS-APCI  $m/z$  calculated for  $\text{C}_{18}\text{H}_{18}\text{O}$   $[\text{M}+\text{H}]^+$  251.1426, found 251.1430.

### ((1-methyl-3-phenylcyclobut-2-en-1-yl)methoxy)triphenylsilane (**3s**)

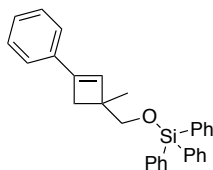



Cyclobutene **3s** was synthesized following the general procedure starting from phenylacetylene (**1a**) (19  $\mu$ l, 0.169 mmol) and ((2-methylallyl)oxy)triphenylsilane (**2f**) (112 mg, 0.338 mmol) with catalyst **A2** (7.7 mg, 0.05 mmol). The reaction time was 72 h and a mixture of pentane and diethyl ether (20:1) was used as eluent in the separation in a preparative TLC in Alumina oxide. **3s** was isolated as a colorless oil.

$^1\text{H}$  NMR (300 MHz, Chloroform-*d*)  $\delta$  7.68 – 7.57 (m, 7H), 7.46 – 7.28 (m, 14H), 6.29 (s, 1H), 3.80 (s, 2H), 2.61 (d,  $J = 12.7$  Hz, 1H), 2.40 (d,  $J = 12.7$  Hz, 1H), 1.30 (s, 3H).  $^{13}\text{C}$  NMR (75 MHz, Chloroform-*d*)  $\delta$  143.92, 135.60, 135.07, 134.60, 133.51, 130.07, 128.39, 127.94, 127.73, 124.62, 71.07, 44.64, 38.30, 21.51. HRMS-APCI  $m/z$  calculated for  $\text{C}_{30}\text{H}_{28}\text{OSi}$   $[\text{M}+\text{H}]^+$  433.1982, found 433.1984.

#### **4. Procedure for the Macrocyclization Reaction**

To a solution of the 1,n-enyne (0.263 mmol) in CH<sub>2</sub>Cl<sub>2</sub> (0.007 M) gold(I) complex (0.00789 mmol) was added. The reaction mixture was stirred at room temperature for 12 h. The reaction was quenched with 0.05 ml of triethylamine and the solvent was removed under reduced pressure. The crude product was purified by preparative TLC.

#### **5. General Procedure for the Preparation of [3.2.1]Oxabicycles**

Alkyne (3.5 equiv) and oxoalkene were dissolved in 1,2-dichloroethane (0.50 M) and the cationic gold (I) catalyst (5 mol%) was added. The reaction mixture was stirred at 50 °C until no oxoalkene was observed by TLC. Then, the mixture was quenched by adding a drop of Et<sub>3</sub>N and the solvent was removed. Preparative TLC was used to purify the [3.2.1]oxabicyclic product.

## 6. Mechanistic Study

### Order of reagents

Figure S1.  $^1\text{H}$  NMR monitoring of the intermolecular gold(I)-catalyzed [2+2] cycloaddition of  $\alpha$ -methylstyrene (0.50 mmol) and changing quantities of phenylacetylene with catalyst **A2** (7.2  $\mu\text{mol}$ ) in  $\text{CD}_2\text{Cl}_2$  (0.56 ml) at room temperature and using diphenylmethane as internal standard.

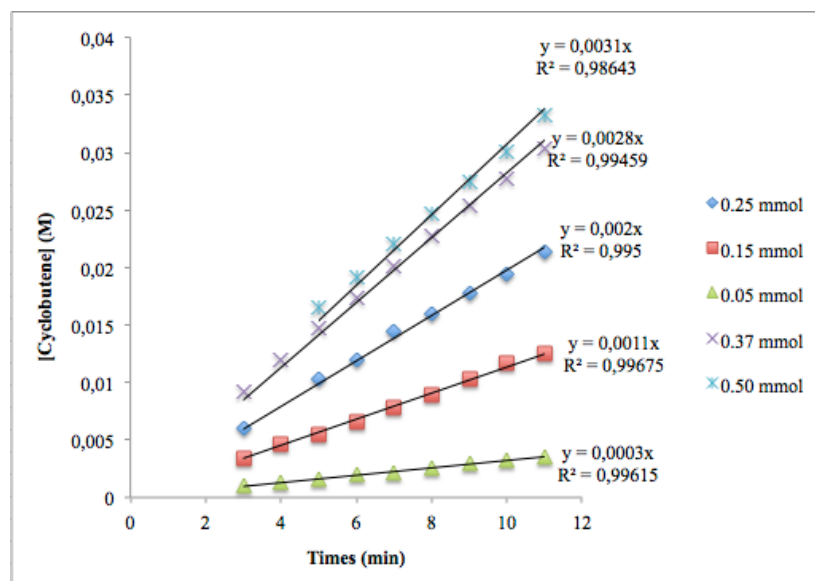

Figure S2.  $^1\text{H}$  NMR monitoring of the intermolecular gold(I)-catalyzed [2+2] cycloaddition of phenylacetylene (0.25 mmol) and changing quantities of  $\alpha$ -methylstyrene with catalyst **A2** (7.2  $\mu\text{mol}$ ) in  $\text{CD}_2\text{Cl}_2$  (0.56 mL) at room temperature and using diphenylmethane as internal standard.

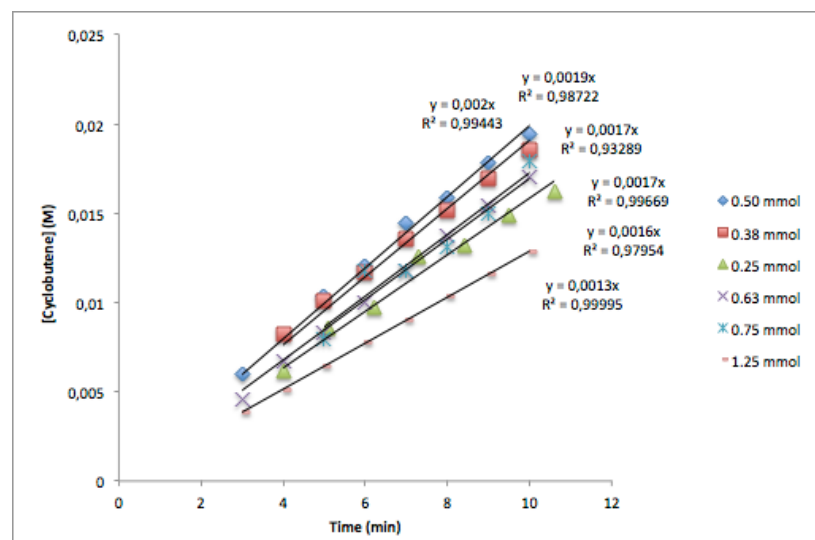

Figure S3.  $^1\text{H}$  NMR monitoring of the intermolecular gold(I)-catalyzed [2+2] cycloaddition of phenylacetylene (0.25 mmol) and  $\alpha$ -methylstyrene (0.50 mmol) with changing quantities of catalyst **A2** in  $\text{CD}_2\text{Cl}_2$  (0.56 ml) at room temperature and using diphenylmethane as internal standard.

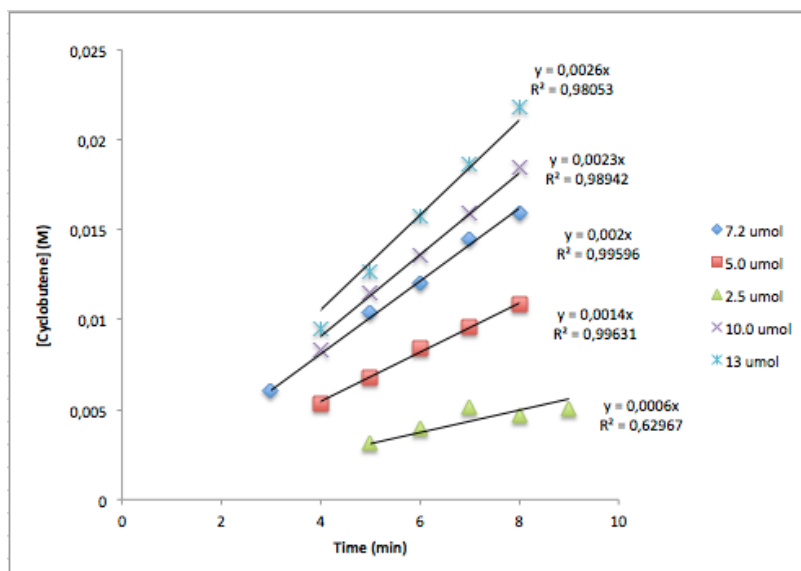

Figure S4. According to the method of the initial rates, it is possible to determine the order of the reagents by the logarithmic graph of the initial formation of the product and the concentration of the varying reagent.

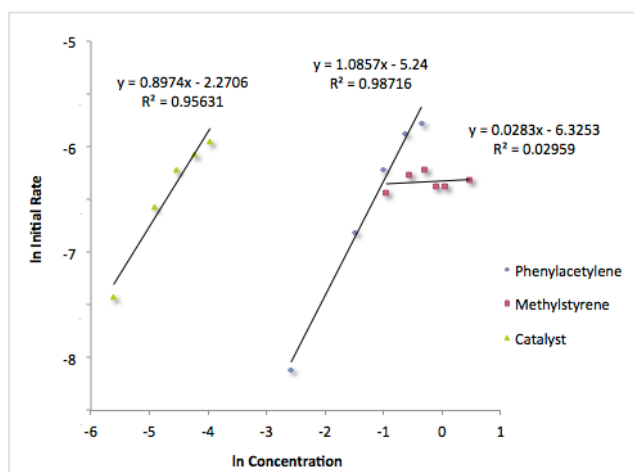

## Kinetics

Figure S5.  $^1\text{H}$  NMR monitoring of the intermolecular gold(I)-catalyzed [2+2] cycloaddition of phenylacetylene (0.25 mmol) and  $\alpha$ -methylstyrene (2 equivalents) with  $[\text{LAuNCMe}]\text{X}$  (3 mol%,  $\text{L} = t\text{BuXPhos}$ ) in  $\text{CD}_2\text{Cl}_2$  (0.55 ml) at room temperature and using diphenylmethane as internal standard (0.5 equivalents). Spectra recorded every 10 min during 10 h and then at 15 h.

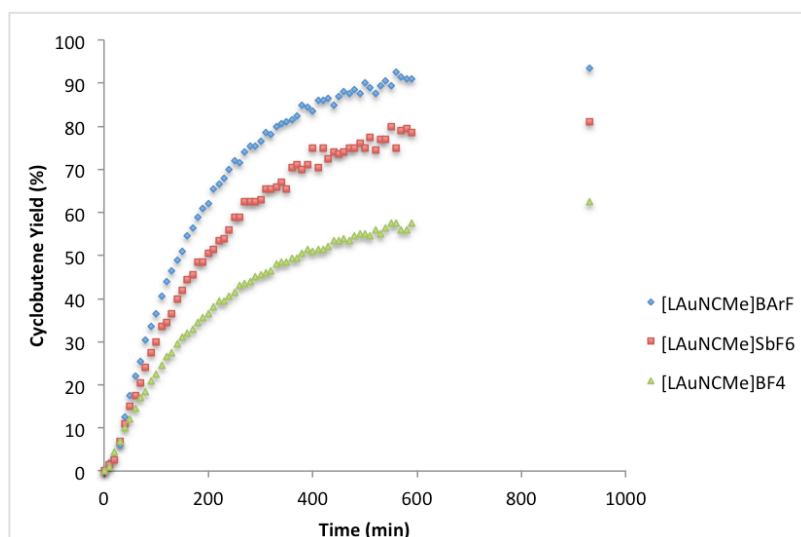

Figure S6. Initial  $^{31}\text{P}$  NMR spectrum of the intermolecular gold(I)-catalyzed [2+2] cycloaddition of phenylacetylene and  $\alpha$ -methylstyrene with **A2** (3 mol%) in  $\text{CD}_2\text{Cl}_2$  and at room temperature shown in Figure S5.

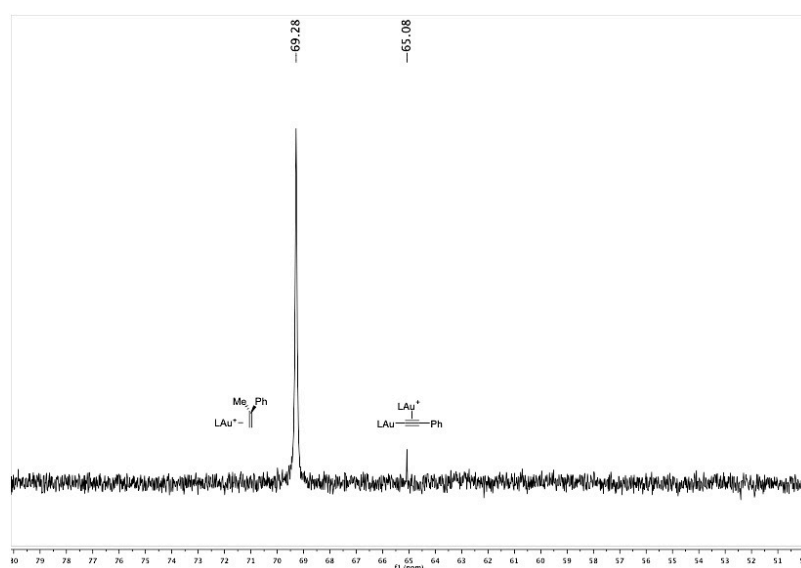

## Equilibrium Constants

The equilibrium constants between catalysts **A1** and **A2** and their related digold and alkene complexes were determined using the van't Hoff equation. Therefore, several samples (substrate:sample 0.5 M = 1:2, 1:1, 2:1, 3.5:1 and 5:1) in CD<sub>2</sub>Cl<sub>2</sub> (0.5 ml) were analysed immediately from 263 to 278, to 293 and to 308K by <sup>1</sup>H and <sup>31</sup>P NMR.

Figure S7. Correlation between the equilibrium constant of **A1** and the digold complex with the temperature was already reported ( $\Delta H^\ddagger > 0$ ).<sup>5</sup>

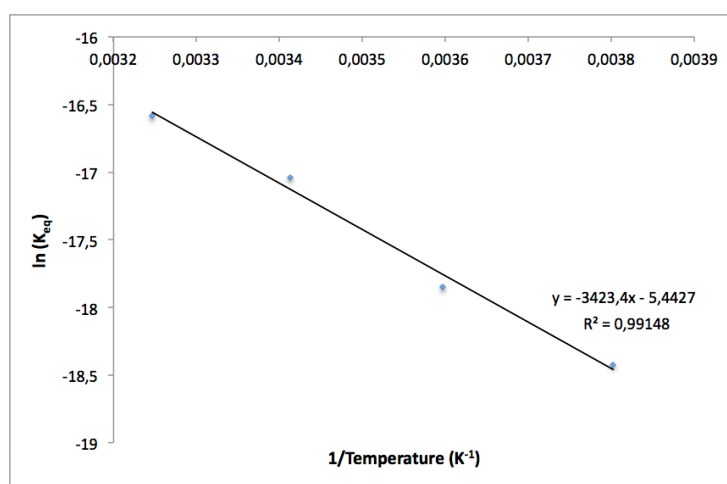

Figure S8. Correlation between the equilibrium constant of **A1** and the alkene complex with the temperature ( $\Delta H^\ddagger < 0$ ).

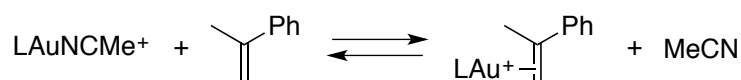

$$K_{eq} = \frac{[\mathbf{15}] \cdot [\text{MeCN}]}{[\mathbf{A}] \cdot [\text{Alkene}]} = \frac{[\mathbf{15}]^2}{([\mathbf{A}]_0 - [\mathbf{15}]) \cdot ([\text{Alkene}]_0 - [\mathbf{15}])}$$

$$\text{Integrals ratio} = \frac{[\mathbf{15}]}{([\mathbf{A}]_0 - [\mathbf{15}])}$$

| Substrate:sample | 263 K | 278 K | 293 K | 308 K |
|------------------|-------|-------|-------|-------|
| 1:2              | 5.93  | 5.96  | 6.41  | 6.90  |
| 1:1              | 4.01  | -     | 4.77  | 5.91  |
| 2:1              | 2.76  | 2.78  | 2.77  | 3.63  |

|       |      |      |      |      |
|-------|------|------|------|------|
| 3.5:1 | 1.78 | 1.96 | 2.00 | 1.97 |
| 5:1   | 1.49 | 1.57 | 1.70 | 1.75 |

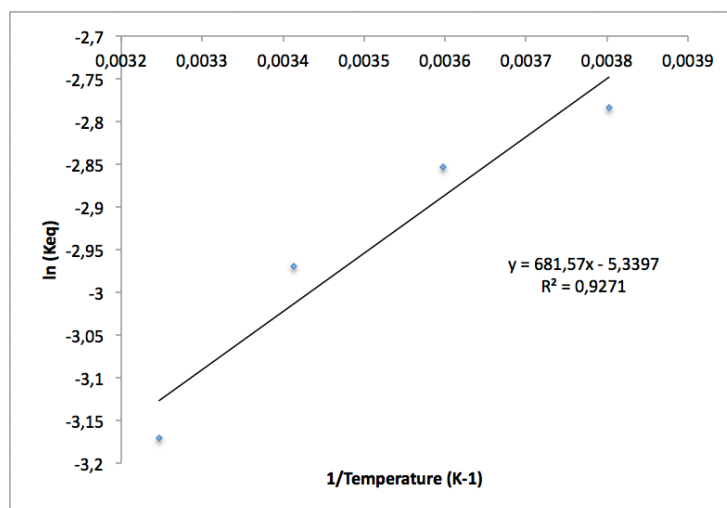

Figure S9. Correlation between the equilibrium constant of **A2** and the digold complex with the temperature ( $\Delta H^\ddagger > 0$ ).

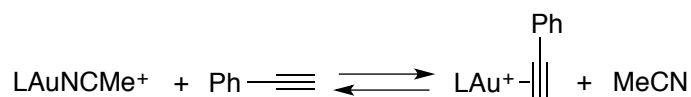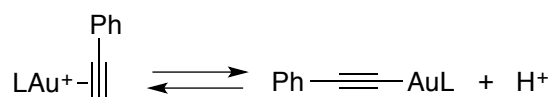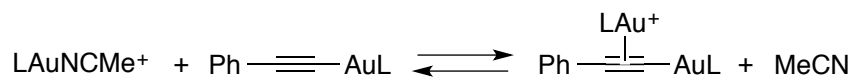

$$K_{eq} = \frac{[\mathbf{9}] \cdot [\text{H}^+] \cdot [\text{MeCN}]^2}{[\mathbf{A}]^2 \cdot [\text{Alkyne}]} = \frac{4 \cdot [\mathbf{9}]^4}{([\mathbf{A}]_0 - 2 \cdot [\mathbf{9}])^2 \cdot ([\text{Alkyne}] - [\mathbf{9}])}$$

$$\text{Integrals ratio} = \frac{[\mathbf{9}]}{([\mathbf{A}]_0 - 2 \cdot [\mathbf{9}])}$$

| Substrate:sample | 263 K  | 278 K  | 293 K | 308 K |
|------------------|--------|--------|-------|-------|
| 1:2              | 160.29 | 103.04 | 86.90 | 56.60 |

|       |        |       |       |       |
|-------|--------|-------|-------|-------|
| 1:1   | 155.16 | 97.66 | 78.90 | 59.71 |
| 2:1   | 113.30 | 79.36 | 49.29 | 46.04 |
| 3.5:1 | 107.32 | 65.03 | 46.26 | 39.33 |
| 5:1   | 82.45  | 52.90 | 42.26 | 35.38 |

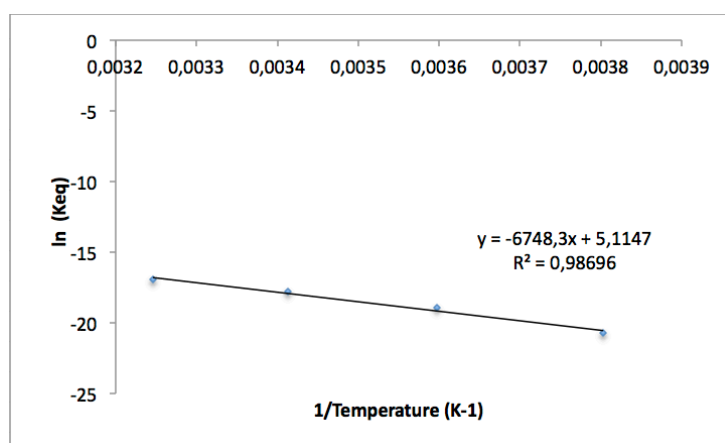

Figure S10. Correlation between the equilibrium constant of **A1** and the alkene complex with the temperature ( $\Delta H^\ddagger < 0$ ).

| Substrate:sample | 263 K | 278 K | 293 K | 308 K |
|------------------|-------|-------|-------|-------|
| 1:2              | 4.84  | 4.90  | 4.97  | 5.05  |
| 1:1              | 3.01  | 3.03  | 3.32  | 3.53  |
| 2:1              | 1.85  | 1.98  | 2.04  | 2.19  |
| 3.5:1            | 1.32  | 1.36  | 1.46  | 1.57  |
| 5:1              | 0.98  | 1.06  | 1.12  | 1.32  |



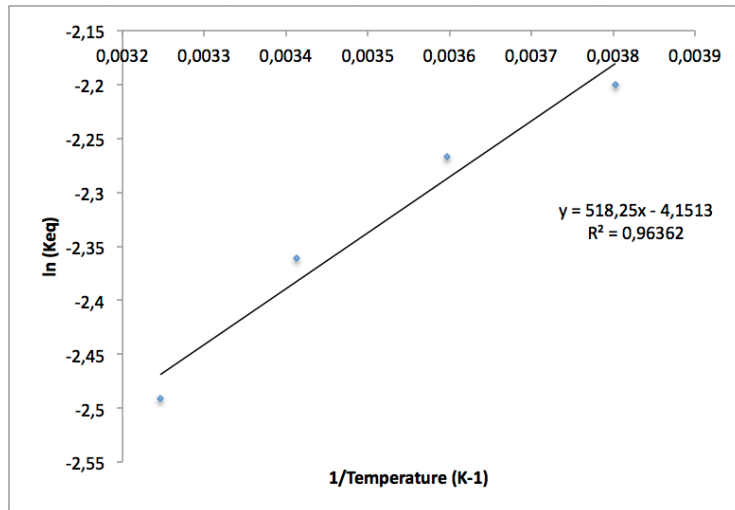

Low temperature NMR experiments

Figure S11.  $^{31}\text{P}$  NMR spectrum of a mixture of phenylacetylene and complex **A1** (10:1) in  $\text{CD}_2\text{Cl}_2$  from 213 – 298 K already reported.<sup>5</sup>

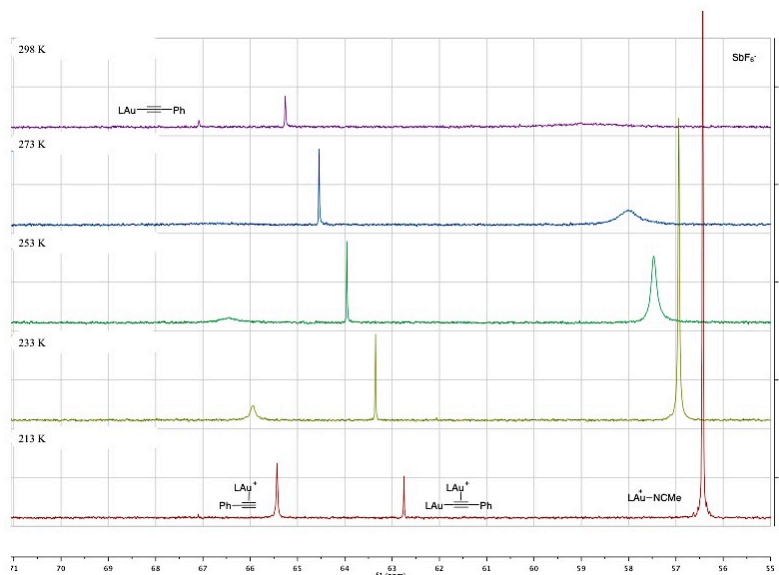

Figure S12.  $^{31}\text{P}$  NMR spectrum of a mixture of phenylacetylene and 25 mg of complex **A2** (10:1) in  $\text{CD}_2\text{Cl}_2$  (0.5 ml) from 213 – 298 K.

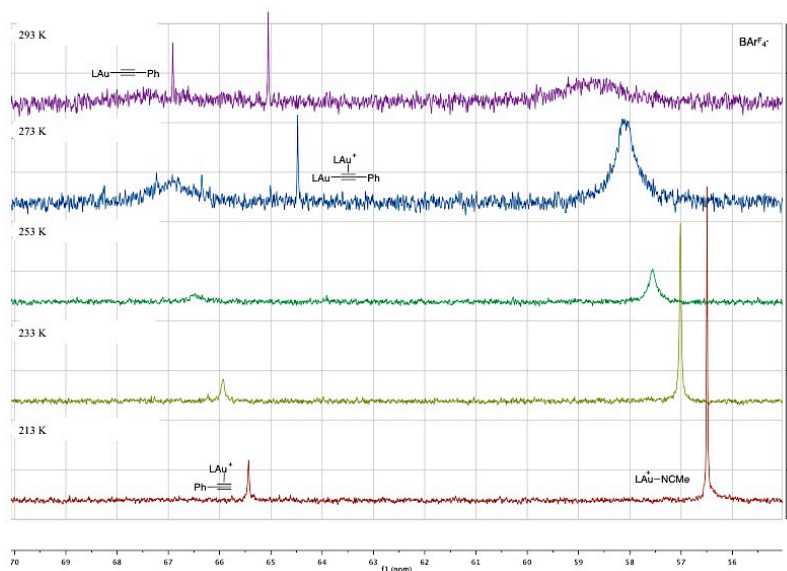

*Electron Density Surfaces*

Total SCF density mapped with ESP ( $r = 0.03 \text{ e}/\text{\AA}^3$ ). Structures calculated with Gaussian 09 using M06 with 6-31G(d) (C, H, P, B, F) and SDD (Au, Sb) in  $\text{CH}_2\text{Cl}_2$ .

*Figure S13.* (*t*BuXPhosAu( $\eta^2$ -phenylacetylene)SbF<sub>6</sub> (**8a**).

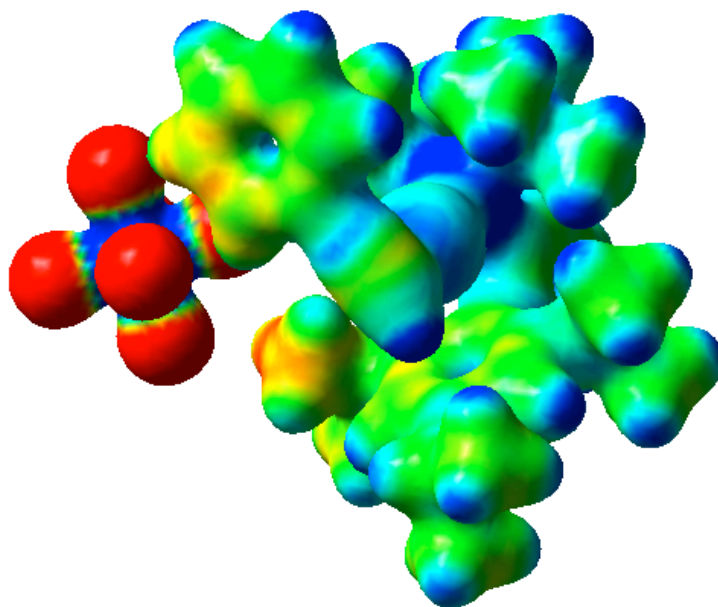

*Figure S14.* (*t*BuXPhosAu( $\eta^2$ -phenylacetylene)BAr<sub>4</sub><sup>F-</sup> (**8b**).

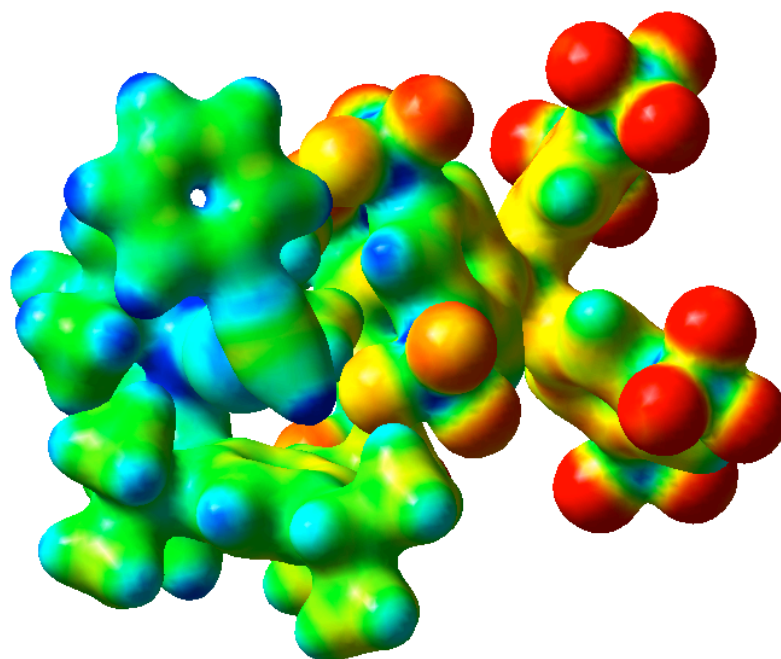

Figure S15. (*t*BuXPhosAu( $\eta^2$ -phenylacetylene)SbF<sub>6</sub> (**8c**).

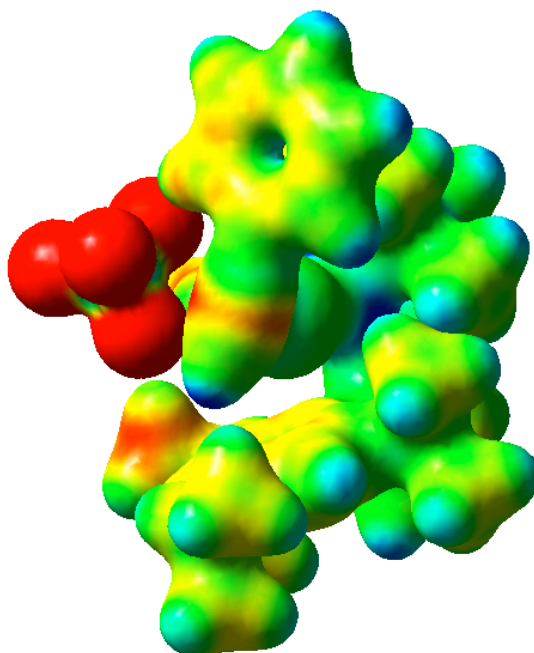

#### Additional Experiments

We also performed some additional catalytic tests to exclude any other mechanistic pathways. We started reacting the isolable intermediates stoichiometrically with  $\alpha$ -methylstyrene and none of them reacted at all.

*Scheme S1.* Stoichiometric reaction between **16** or **9b** and  $\alpha$ -methylstyrene under the optimized conditions (L = *t*BuXPhos).

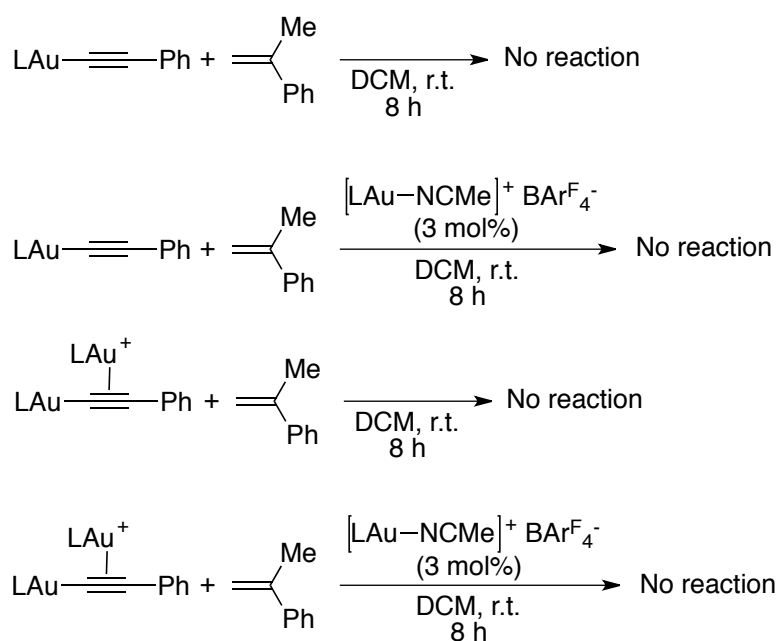

*Scheme S2.* Intermolecular gold(I)-catalyzed reaction between phenylacetylene and  $\alpha$ -methylstyrene with **16** or **9b** under the optimized conditions (L = *t*BuXPhos).

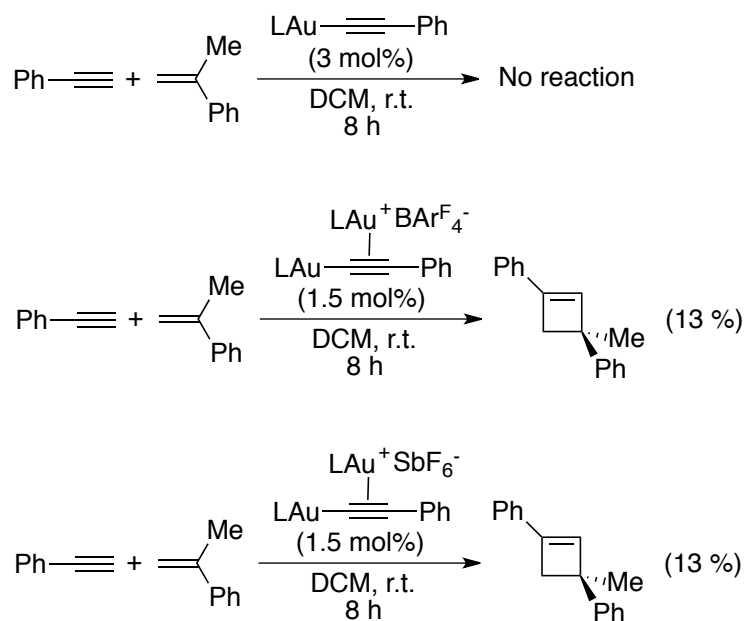

*Scheme S3.* Intermolecular gold(I)-catalyzed reaction between phenylacetylene and  $\alpha$ -methylstyrene with **16** or **9a** and substoichiometric amounts of  $\text{HSbF}_6 \cdot 6\text{H}_2\text{O}$  under the optimized conditions (L = *t*BuXPhos). The activity increases as a result of the reestablishment of the equilibrium to the monogold complex **8a**.

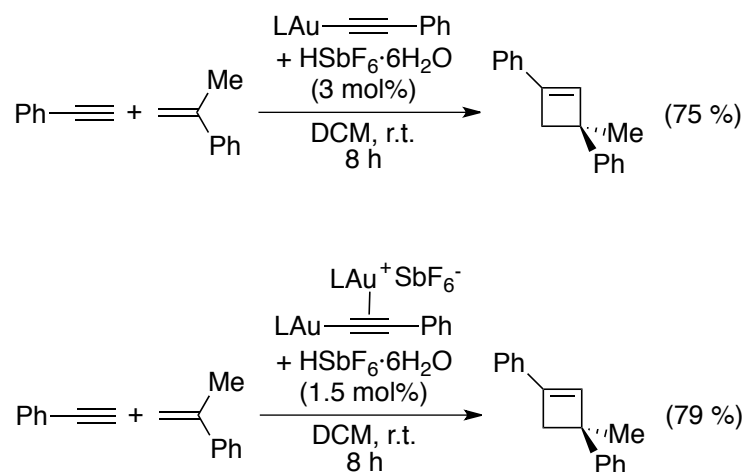

*Scheme S4.* Intermolecular gold(I)-catalyzed reaction between **15b** and **16** or phenylacetylene under the optimized conditions (L = tBuXPhos). We also tried to add other carbonucleophiles, for example, allyltrimethylsilane, indole, 1,3,5-trimethoxybenzene or 1,3-diphenylpropane-1,3-dione to the alkene using **A2**.

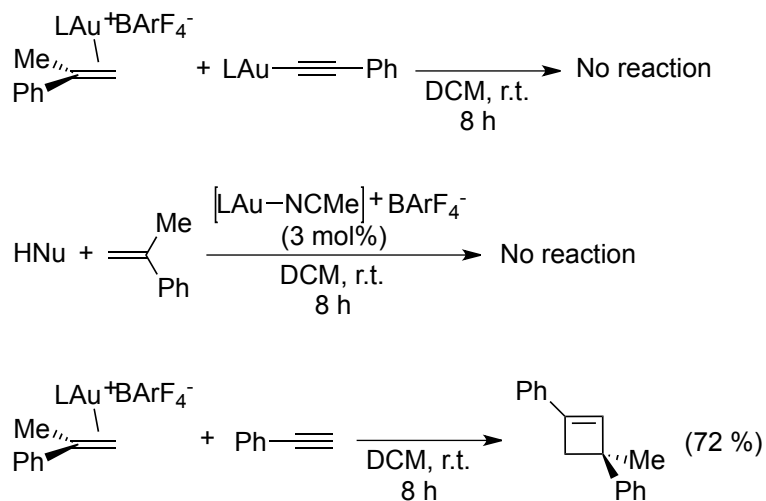

## 7. X-Ray Crystallographic Data

### [(2',4',6'-triisopropyl-1,1'-biphenyl-2-yl)di-*tert*-butylphosphine](2-phenylethynyl)gold(I) (16)

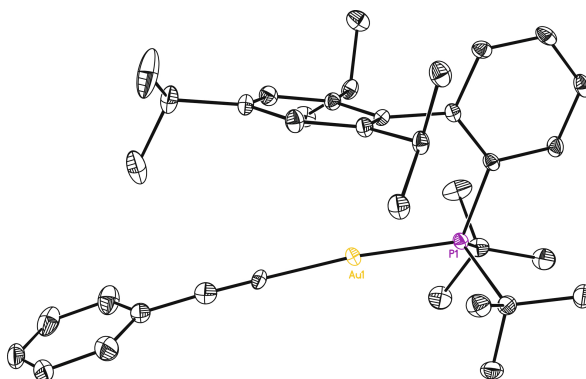

Table S1. Crystal data and structure refinement for CCDC 953709.

|                                 |                                                           |                                                         |
|---------------------------------|-----------------------------------------------------------|---------------------------------------------------------|
| Empirical formula               | C <sub>36</sub> H <sub>50</sub> Au N P                    |                                                         |
| Formula weight                  | 724.71                                                    |                                                         |
| Temperature                     | 100(2) K                                                  |                                                         |
| Wavelength                      | 0.71073 Å                                                 |                                                         |
| Crystal system                  | Triclinic                                                 |                                                         |
| Space group                     | P-1                                                       |                                                         |
| Unit cell dimensions            | a = 10.8245(8) Å<br>b = 12.6401(9) Å<br>c = 13.3697(10) Å | a = 101.506(2) °<br>b = 95.285(2) °<br>g = 112.126(2) ° |
| Volume                          | 1632.1(2) Å <sup>3</sup>                                  |                                                         |
| Z                               | 2                                                         |                                                         |
| Density (calculated)            | 1.475 Mg/m <sup>3</sup>                                   |                                                         |
| Absorption coefficient          | 4.580 mm <sup>-1</sup>                                    |                                                         |
| F(000)                          | 734                                                       |                                                         |
| Crystal size                    | 0.25 x 0.12 x 0.10 mm <sup>3</sup>                        |                                                         |
| Theta range for data collection | 1.80 to 30.39 °                                           |                                                         |
| Index ranges                    | -14 ≤ h ≤ 13, -14 ≤ k ≤ 17, -17 ≤ l ≤ 17                  |                                                         |
| Reflections collected           | 26200                                                     |                                                         |
| Independent reflections         | 8605 [R(int) = 0.0279]                                    |                                                         |
| Completeness to theta = 30.39 ° | 87.1%                                                     |                                                         |
| Absorption correction           | Empirical                                                 |                                                         |
| Max. and min. transmission      | 0.6573 and 0.3939                                         |                                                         |
| Refinement method               | Full-matrix least-squares on F <sup>2</sup>               |                                                         |
| Data / restraints / parameters  | 8605 / 0 / 364                                            |                                                         |

|                                      |                                      |
|--------------------------------------|--------------------------------------|
| Goodness-of-fit on $F^2$             | 1.039                                |
| Final R indices [ $I > 2\sigma(I)$ ] | $R1 = 0.0196$ , $wR2 = 0.0483$       |
| R indices (all data)                 | $R1 = 0.0213$ , $wR2 = 0.0490$       |
| Largest diff. peak and hole          | 1.618 and -1.437 $e.\text{\AA}^{-3}$ |

**( $\alpha$ -Methylstyrene)[(2',4',6'-triisopropyl-1,1'-biphenyl-2-yl)di-*tert*-butylphosphine]gold(I) tetrakis[3,5-bis(trifluoromethyl)phenyl] borate (15b)**

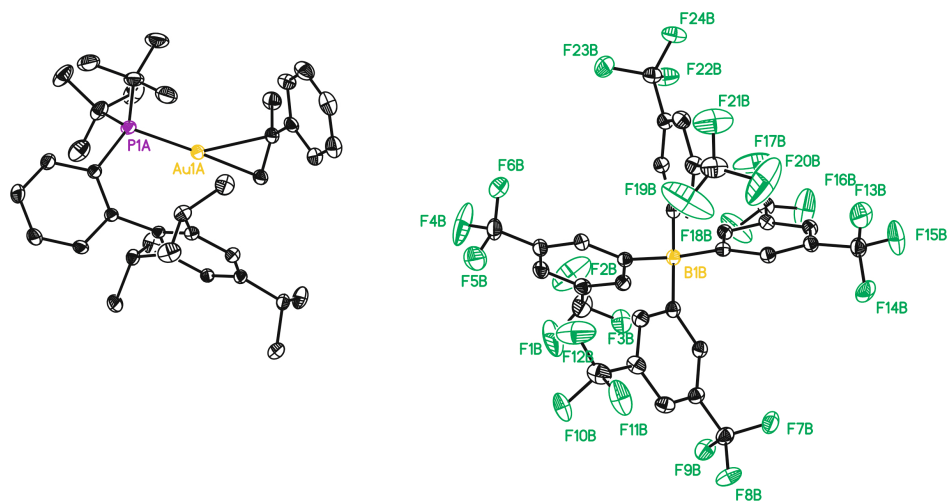

Table 2. Crystal data and structure refinement for CCDC 953708.

|                                 |                                                                |                        |
|---------------------------------|----------------------------------------------------------------|------------------------|
| Empirical formula               | C70 H67 Au B F24 P                                             |                        |
| Formula weight                  | 1602.98                                                        |                        |
| Temperature                     | 100(2) K                                                       |                        |
| Wavelength                      | 0.71073 $\text{\AA}$                                           |                        |
| Crystal system                  | Monoclinic                                                     |                        |
| Space group                     | P2(1)/n                                                        |                        |
| Unit cell dimensions            | $a = 12.876(11) \text{\AA}$                                    | $a = 90.00^\circ$ .    |
|                                 | $b = 14.771(3) \text{\AA}$                                     | $b = 90.39(2)^\circ$ . |
|                                 | $c = 36.339(8) \text{\AA}$                                     | $g = 90.00^\circ$ .    |
| Volume                          | $6911(6) \text{\AA}^3$                                         |                        |
| Z                               | 4                                                              |                        |
| Density (calculated)            | $1.541 \text{ Mg/m}^3$                                         |                        |
| Absorption coefficient          | $2.257 \text{ mm}^{-1}$                                        |                        |
| F(000)                          | 3208                                                           |                        |
| Crystal size                    | $0.20 \times 0.20 \times 0.20 \text{ mm}^3$                    |                        |
| Theta range for data collection | 2.37 to $36.40^\circ$ .                                        |                        |
| Index ranges                    | $-20 \leq h \leq 21$ , $0 \leq k \leq 24$ , $0 \leq l \leq 59$ |                        |



|                                   |                                             |
|-----------------------------------|---------------------------------------------|
| Reflections collected             | 31125                                       |
| Independent reflections           | 31125 [R(int) = 0.0000 ]                    |
| Completeness to theta =36.40 °    | 92.299995%                                  |
| Absorption correction             | Empirical                                   |
| Max. and min. transmission        | 0.6610 and 0.6610                           |
| Refinement method                 | Full-matrix least-squares on F <sup>2</sup> |
| Data / restraints / parameters    | 31125 / 790 / 1353                          |
| Goodness-of-fit on F <sup>2</sup> | 1.035                                       |
| Final R indices [I>2sigma(I)]     | R1 = 0.0347 , wR2 = 0.0866                  |
| R indices (all data)              | R1 = 0.0506 , wR2 = 0.0902                  |
| Largest diff. peak and hole       | 2.035 and -0.829 e.Å <sup>-3</sup>          |

**{Phenylethynyl[(2',4',6'-triisopropyl-1,1'-biphenyl-2-yl)di-tert-butylphosphine]gold(I)}**

**[(2',4',6'-triisopropyl-1,1'-biphenyl-2-yl)di-tert-butylphosphine]gold(I) tetrakis[3,5-bis(trifluoromethyl)phenyl] borate (9b)**

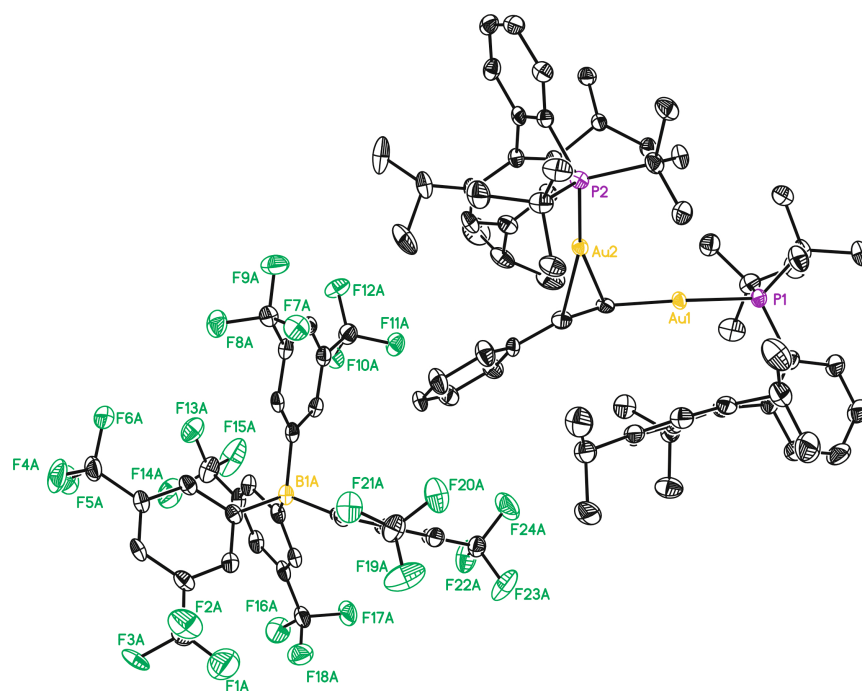

Table S3. Crystal data and structure refinement for CCDC 953710.

|                   |                                    |
|-------------------|------------------------------------|
| Empirical formula | C98.25 H108.50 Au2 B Cl0.50 F24 P2 |
| Formula weight    | 2229.76                            |
| Temperature       | 100(2) K                           |
| Wavelength        | 0.71073 Å                          |

|                                   |                                             |                   |
|-----------------------------------|---------------------------------------------|-------------------|
| Crystal system                    | Triclinic                                   |                   |
| Space group                       | P-1                                         |                   |
| Unit cell dimensions              | a = 12.7748(13) Å                           | a = 107.801(3) °. |
|                                   | b = 17.3827(17) Å                           | b = 95.994(4) °.  |
|                                   | c = 22.973(2) Å                             | g = 93.979(3) °.  |
| Volume                            | 4802.8(8) Å <sup>3</sup>                    |                   |
| Z                                 | 2                                           |                   |
| Density (calculated)              | 1.542 Mg/m <sup>3</sup>                     |                   |
| Absorption coefficient            | 3.190 mm <sup>-1</sup>                      |                   |
| F(000)                            | 2231                                        |                   |
| Crystal size                      | 0.20 x 0.12 x 0.02 mm <sup>3</sup>          |                   |
| Theta range for data collection   | 0.94 to 26.48 °.                            |                   |
| Index ranges                      | -15 <=h<=16 , -21 <=k<=21 , -28 <=l<=28     |                   |
| Reflections collected             | 138270                                      |                   |
| Independent reflections           | 19731 [R(int) = 0.0485 ]                    |                   |
| Completeness to theta =26.48 °    | 99.4%                                       |                   |
| Absorption correction             | Empirical                                   |                   |
| Max. and min. transmission        | 0.9390 and 0.5679                           |                   |
| Refinement method                 | Full-matrix least-squares on F <sup>2</sup> |                   |
| Data / restraints / parameters    | 19731 / 108 / 1263                          |                   |
| Goodness-of-fit on F <sup>2</sup> | 1.046                                       |                   |
| Final R indices [I>2sigma(I)]     | R1 = 0.0275 , wR2 = 0.0615                  |                   |
| R indices (all data)              | R1 = 0.0397 , wR2 = 0.0670                  |                   |
| Largest diff. peak and hole       | 1.871 and -0.734 e.Å <sup>-3</sup>          |                   |

## 8. NMR Spectra

(Acetonitrile)[(2',4',6'-triisopropyl-1,1'-biphenyl-2-yl)di-*tert*-butylphosphine]gold(I) tetrakis[3,5-bis(trifluoromethyl)phenyl] borate (A2)

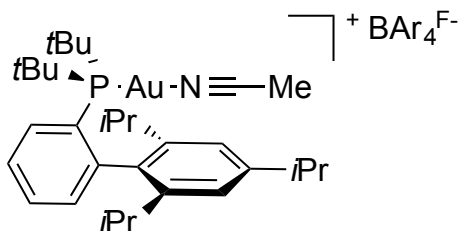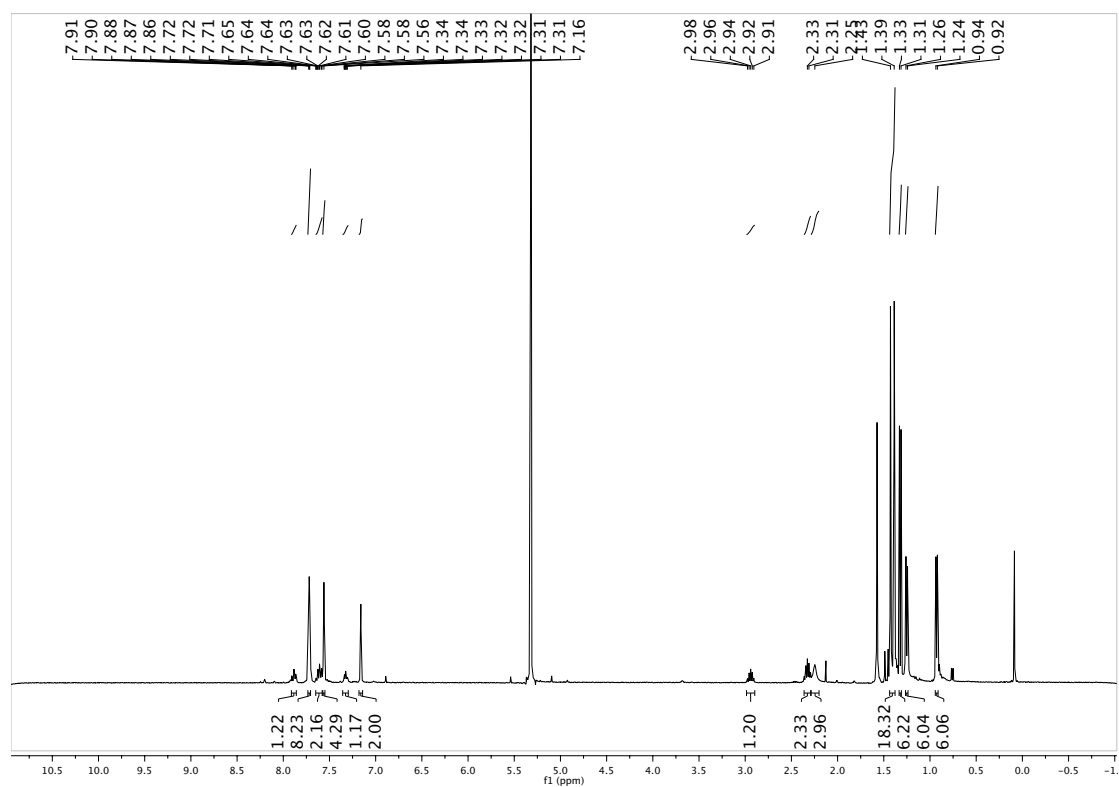

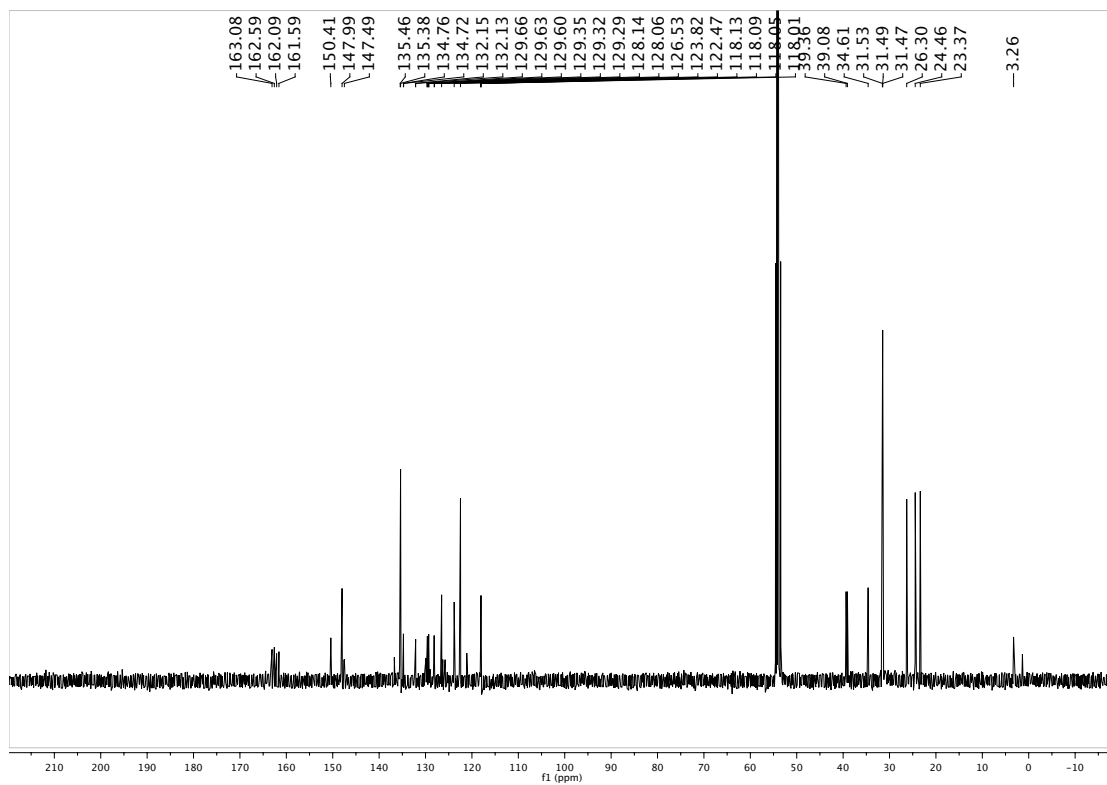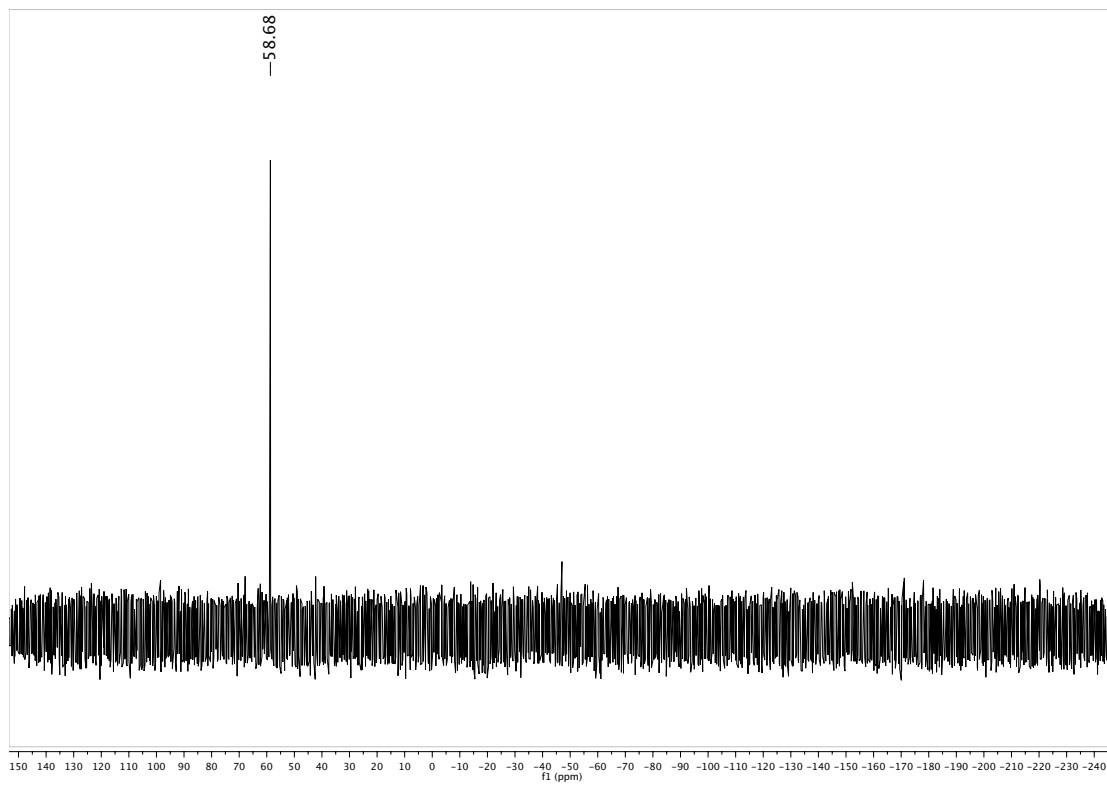

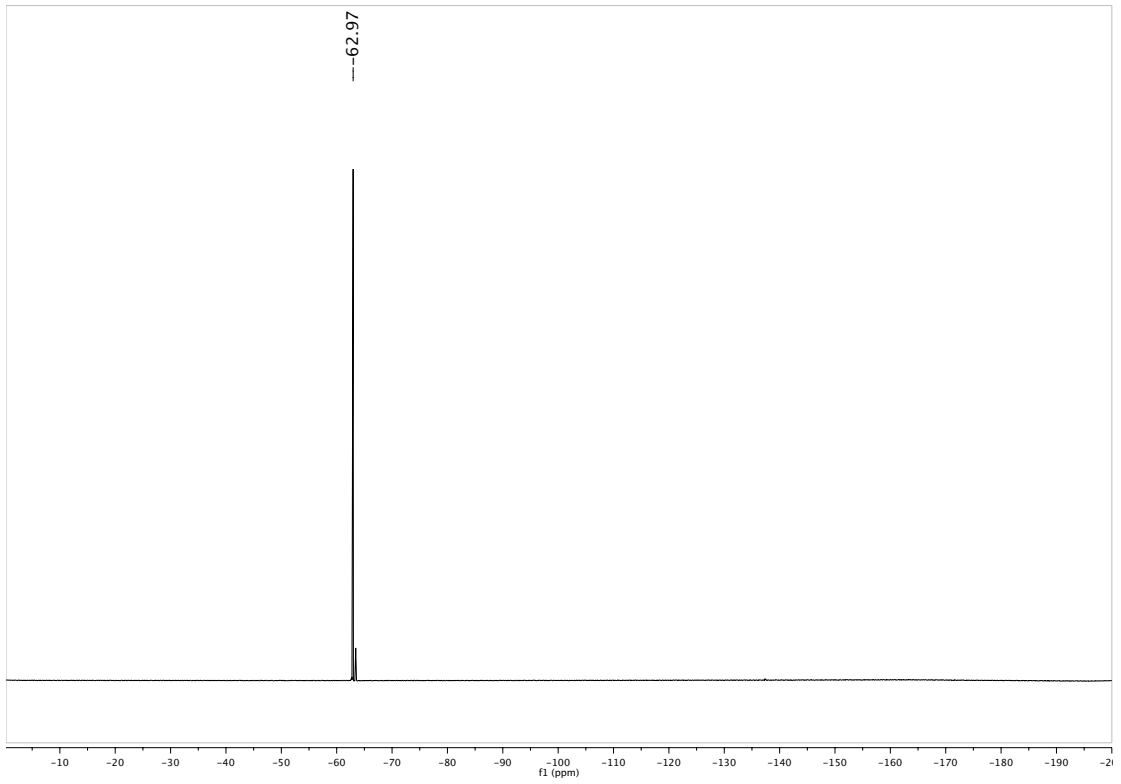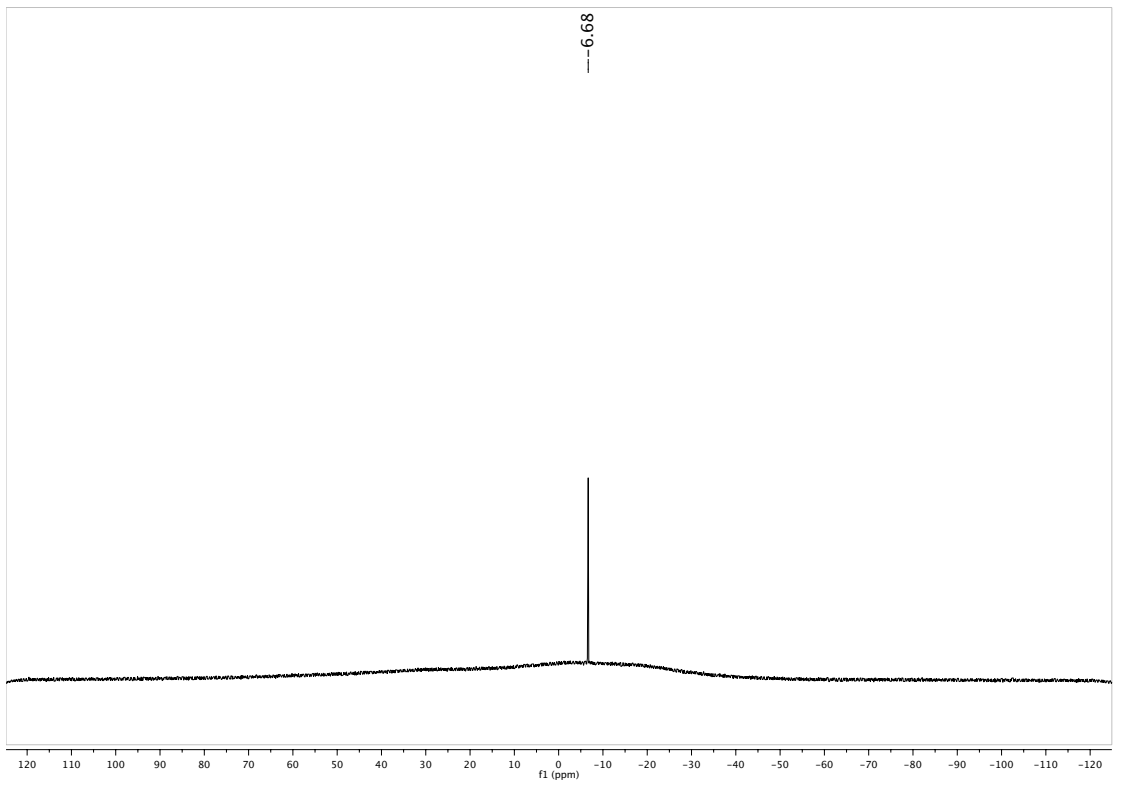

**(Acetonitrile)[(2',4',6'-triisopropyl-1,1'-biphenyl-2-yl)di-tert-butylphosphine]gold(I) tetrafluoroborate (A3)**

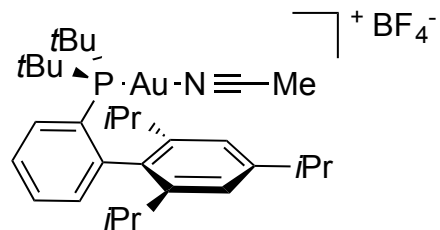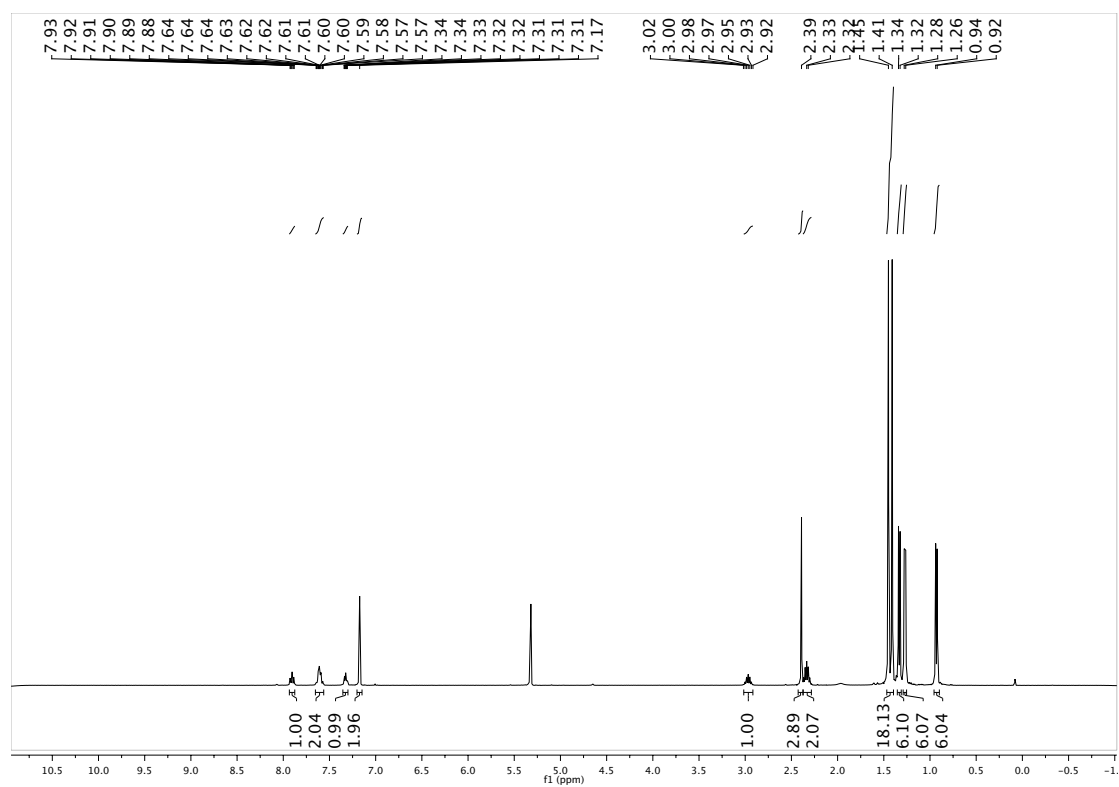

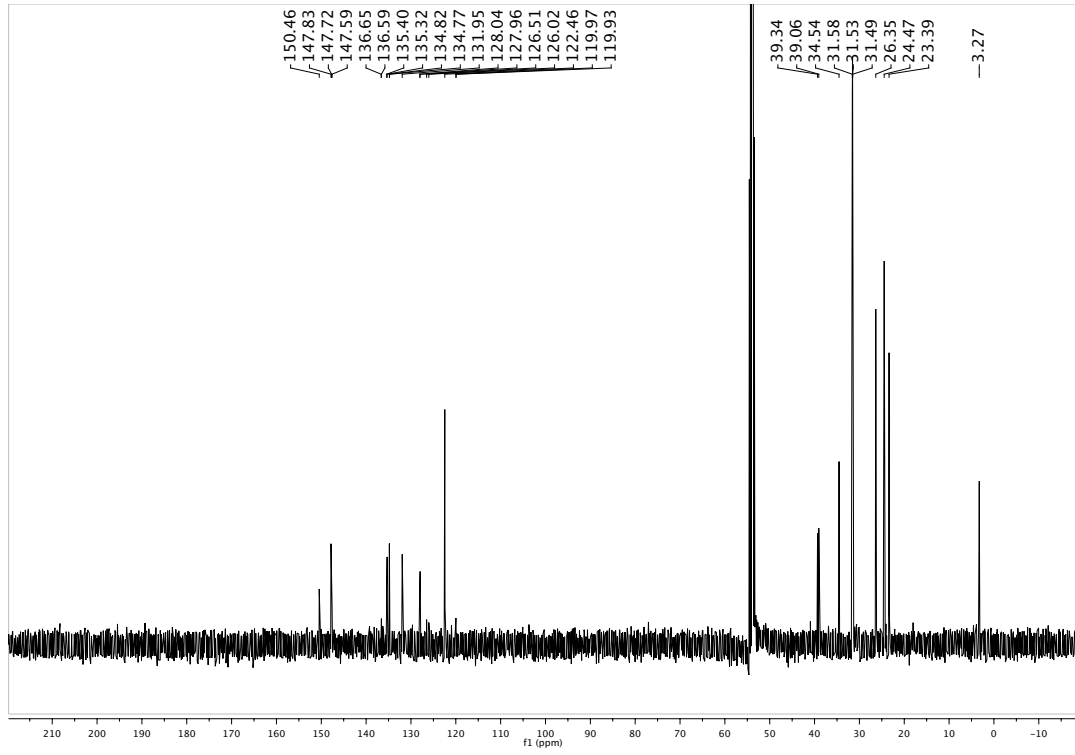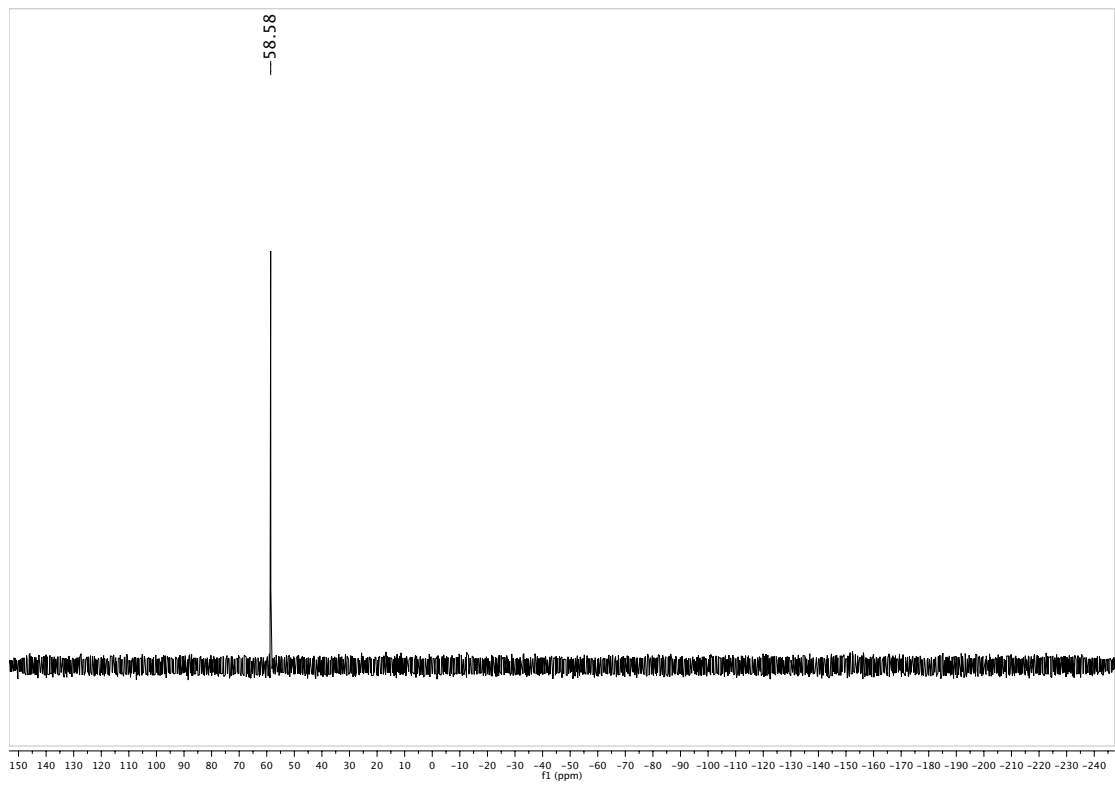

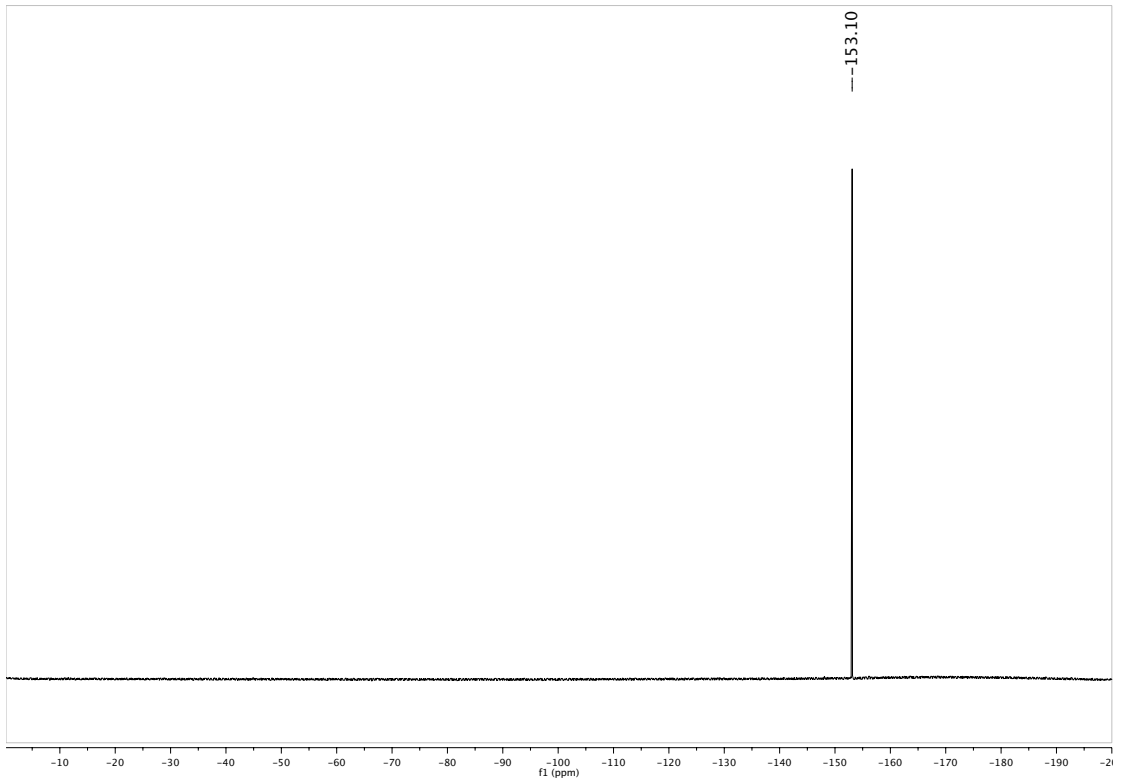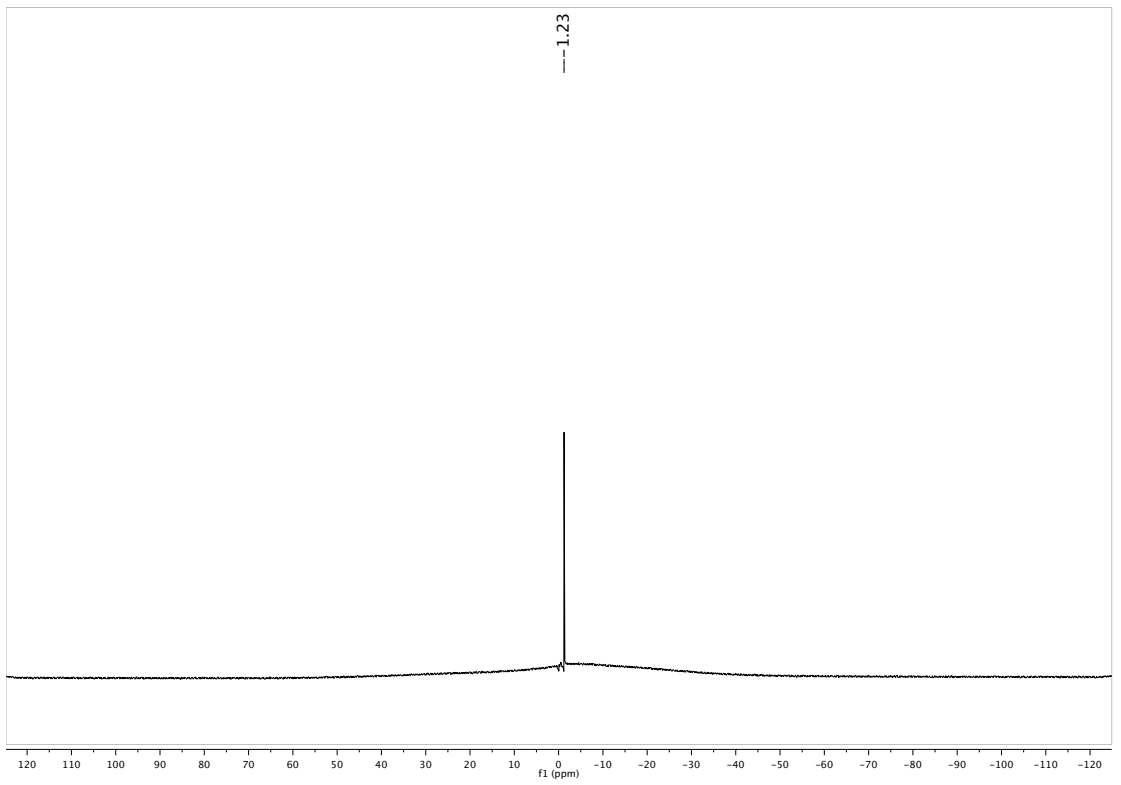



(Acetonitrile)[(2',4',6'-triisopropyl-1,1'-biphenyl-2-yl)di-tert-butylphosphine]gold(I) hexafluorophosphate (A4)

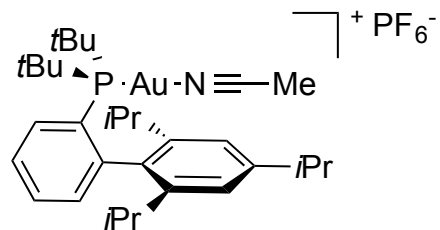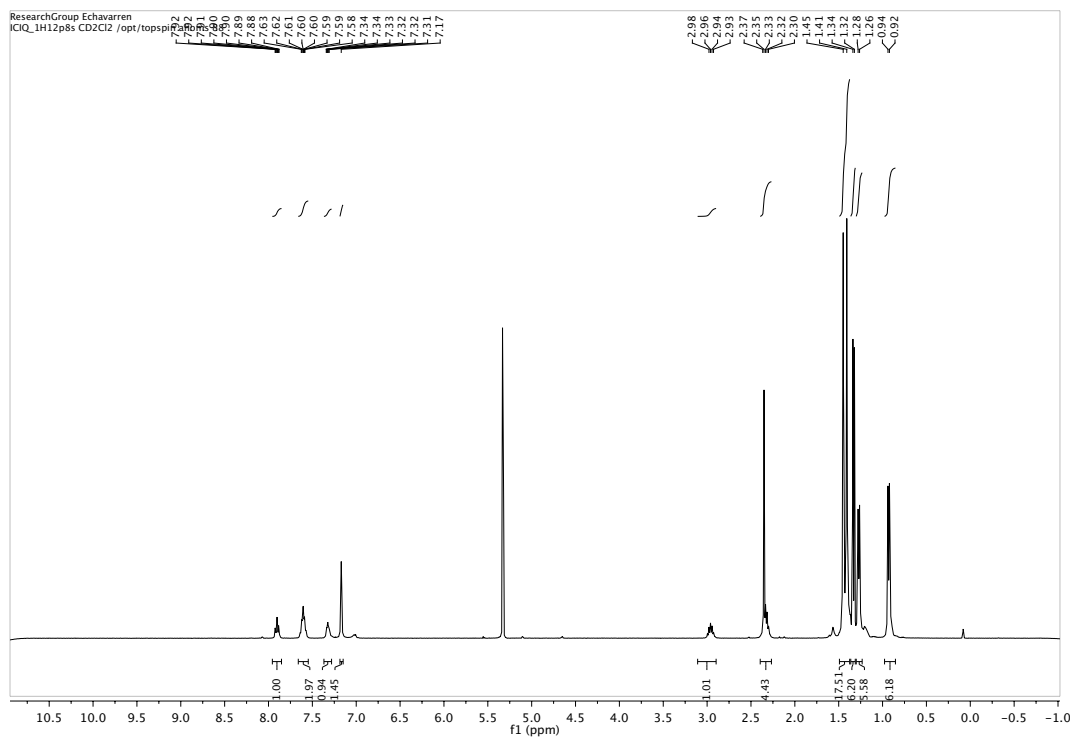

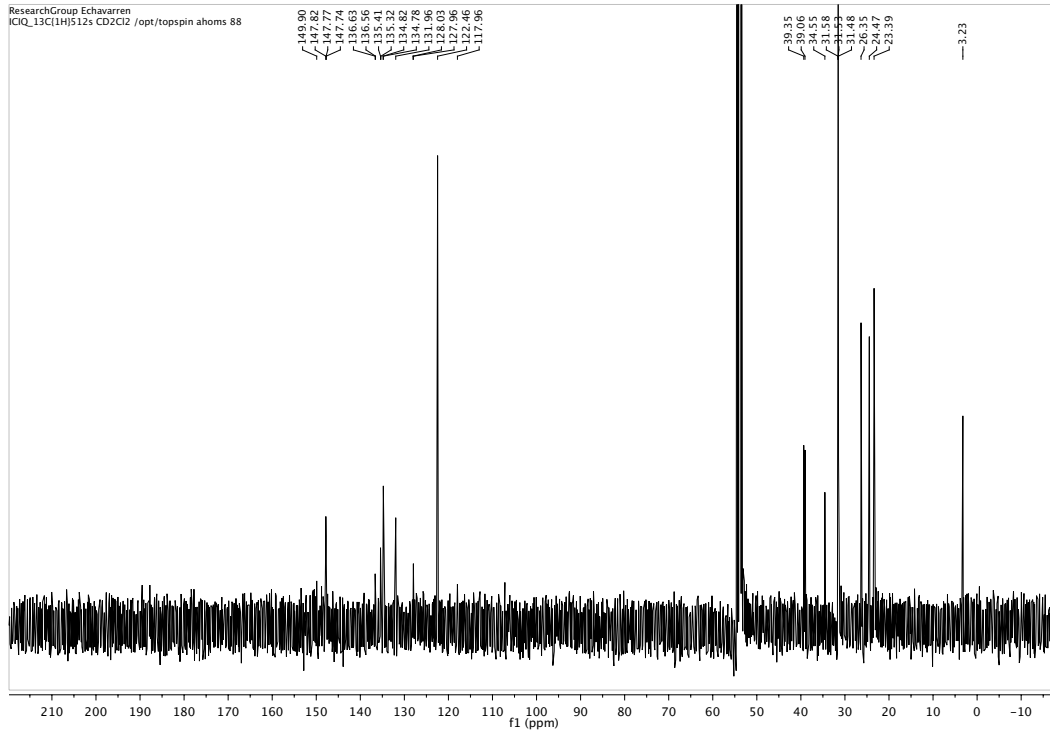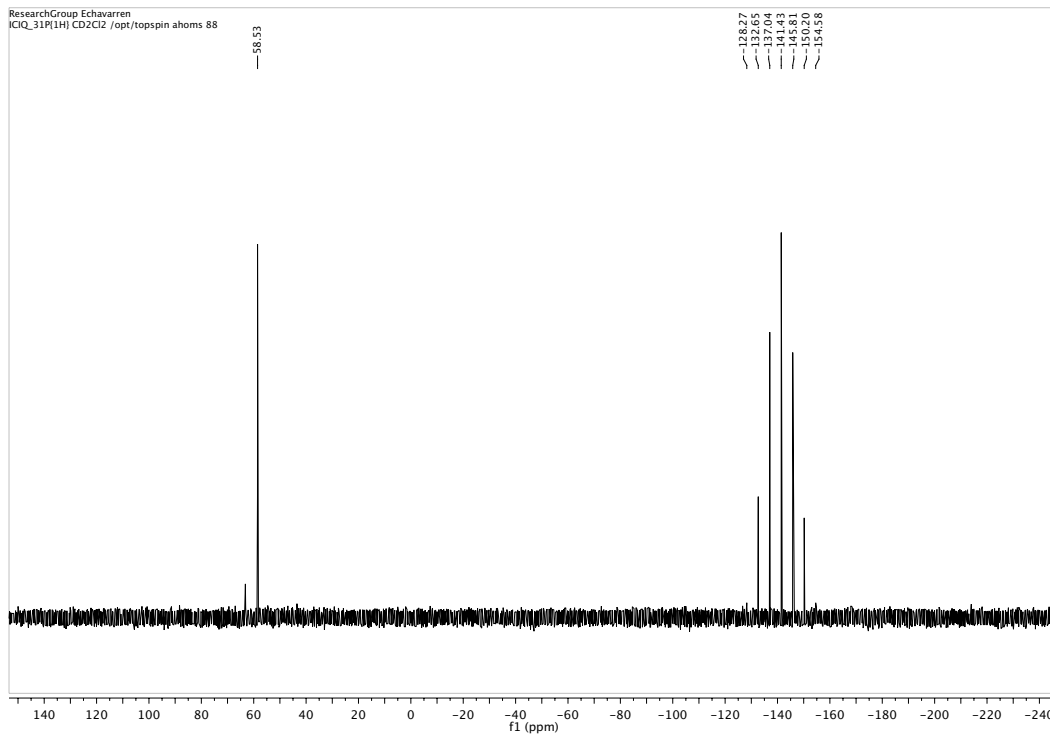

ResearchGroup Echavarren  
f1q\_19f[1H] CD2Cl2 /opt/topspin ahoms 88

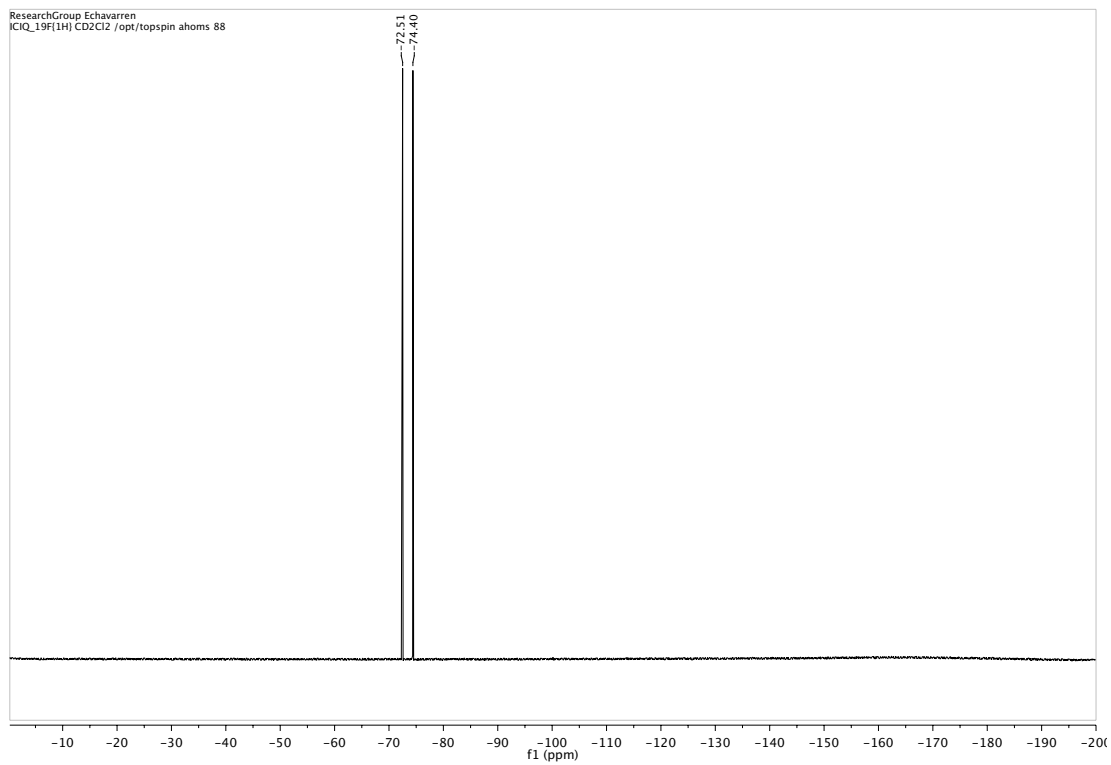

**[(2',4',6'-triisopropyl-1,1'-biphenyl-2-yl)di-*tert*-butylphosphine](2-phenylethynyl)gold(I) (16)**

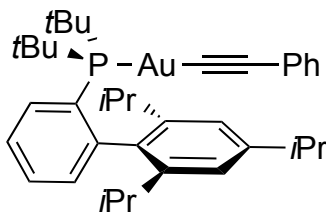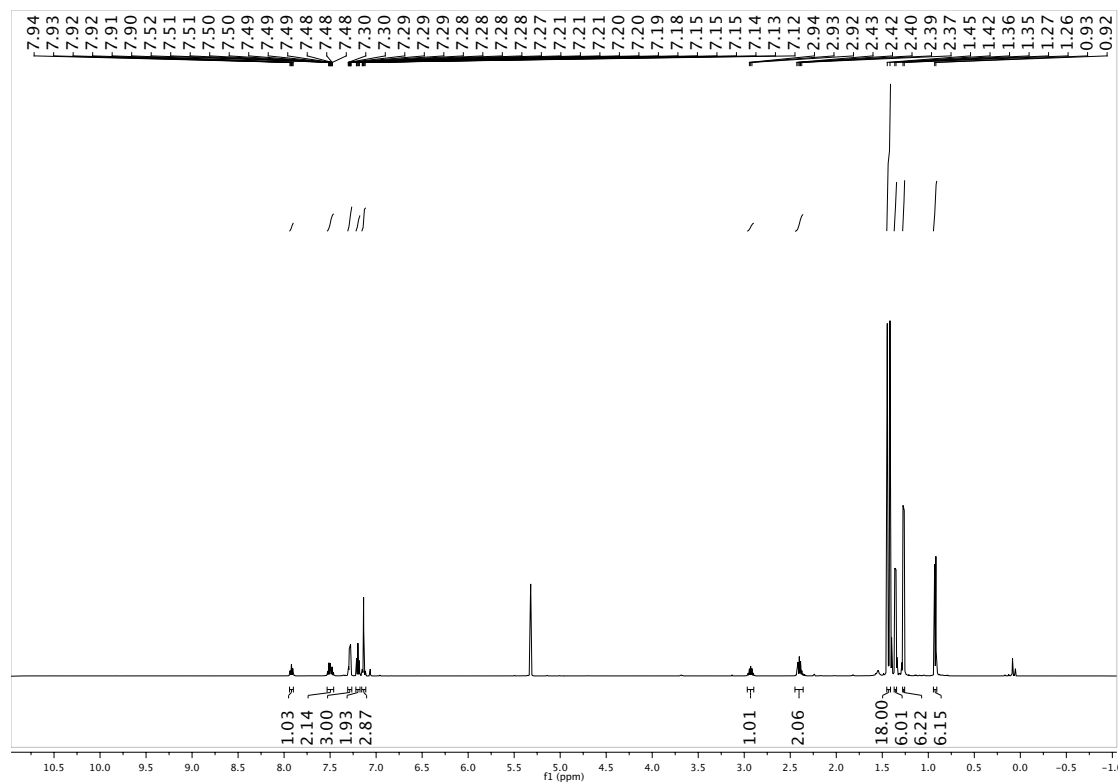

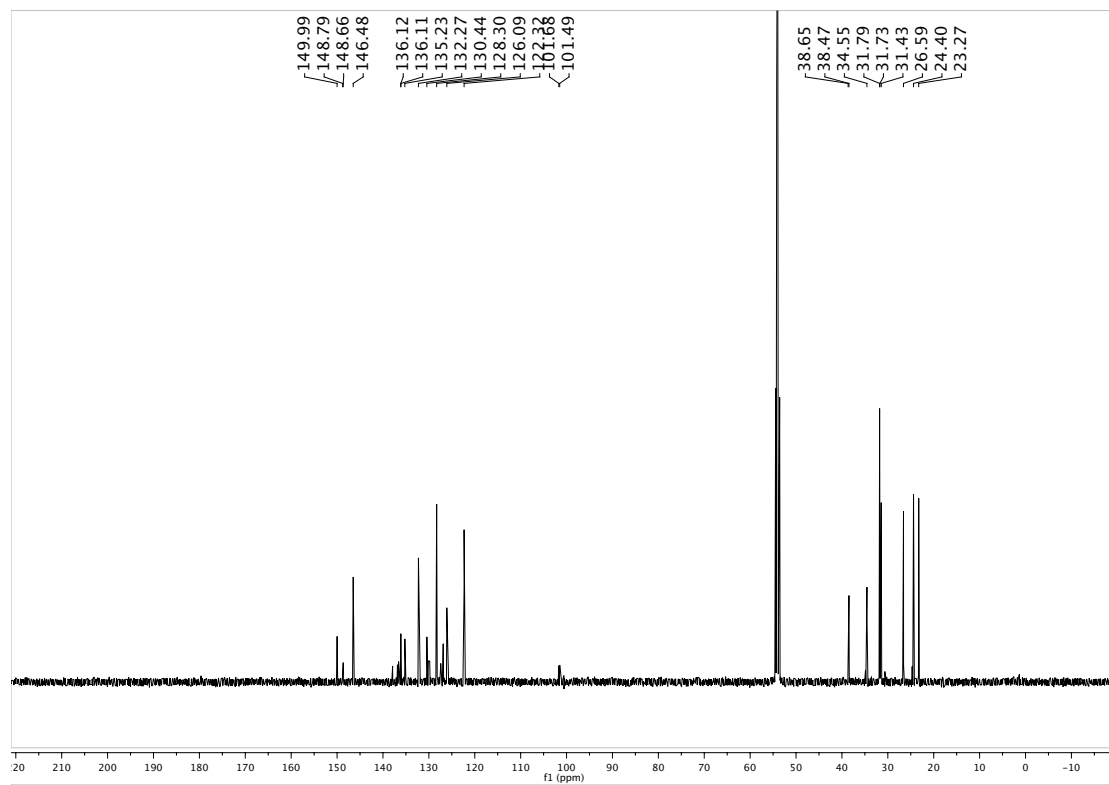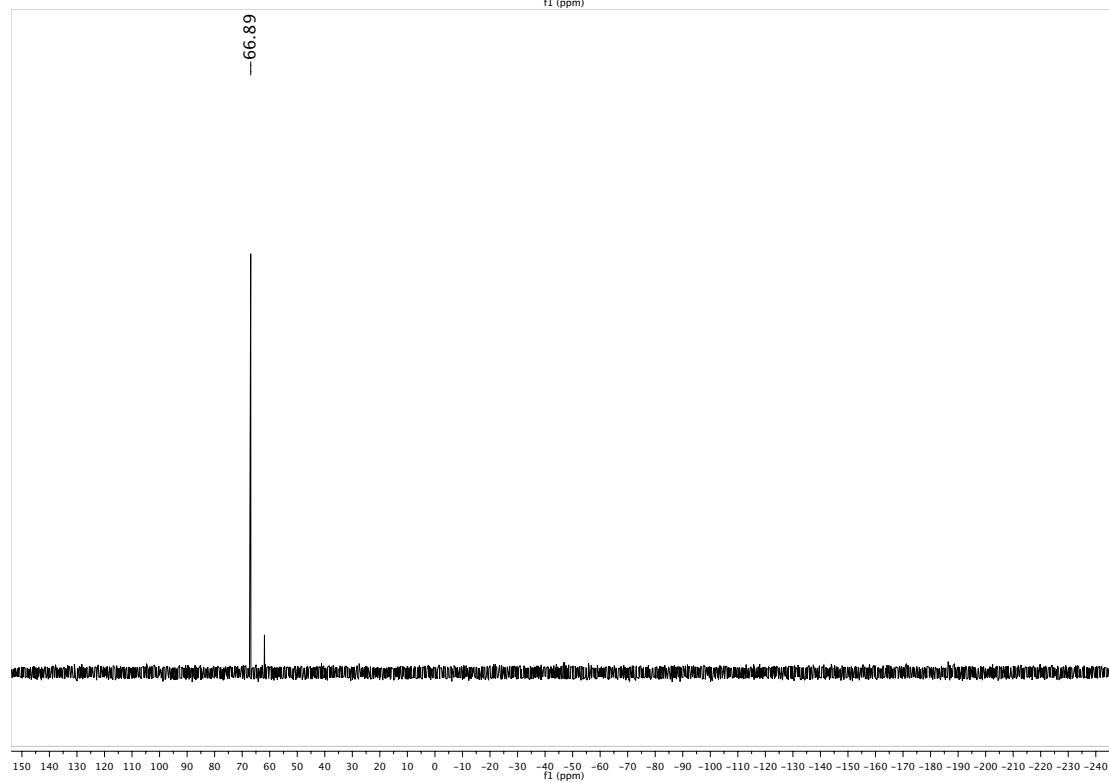

**( $\alpha$ -Methylstyrene)[(2',4',6'-triisopropyl-1,1'-biphenyl-2-yl)di-*tert*-butylphosphine]gold(I) tetrakis[3,5-bis(trifluoromethyl)phenyl] borate (15b)**

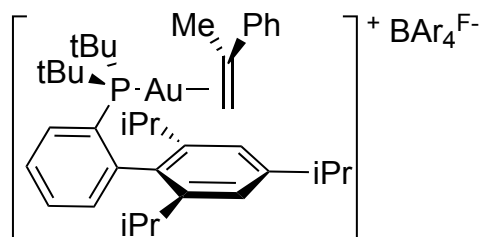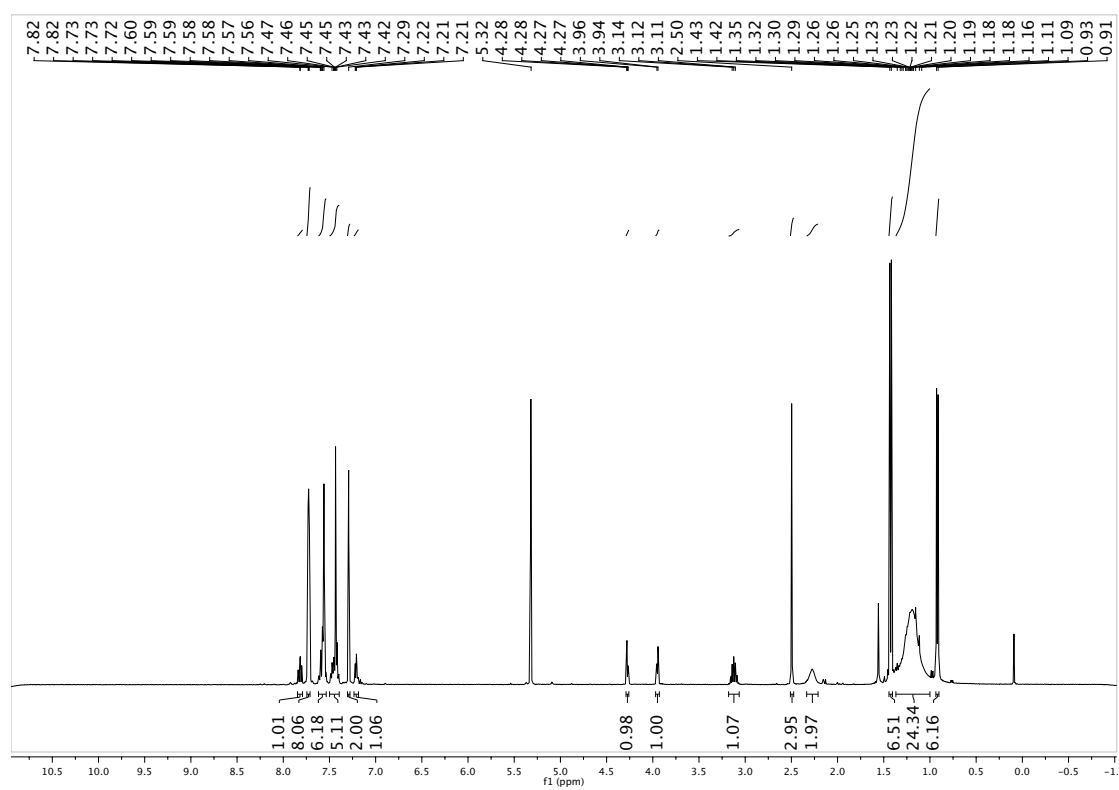

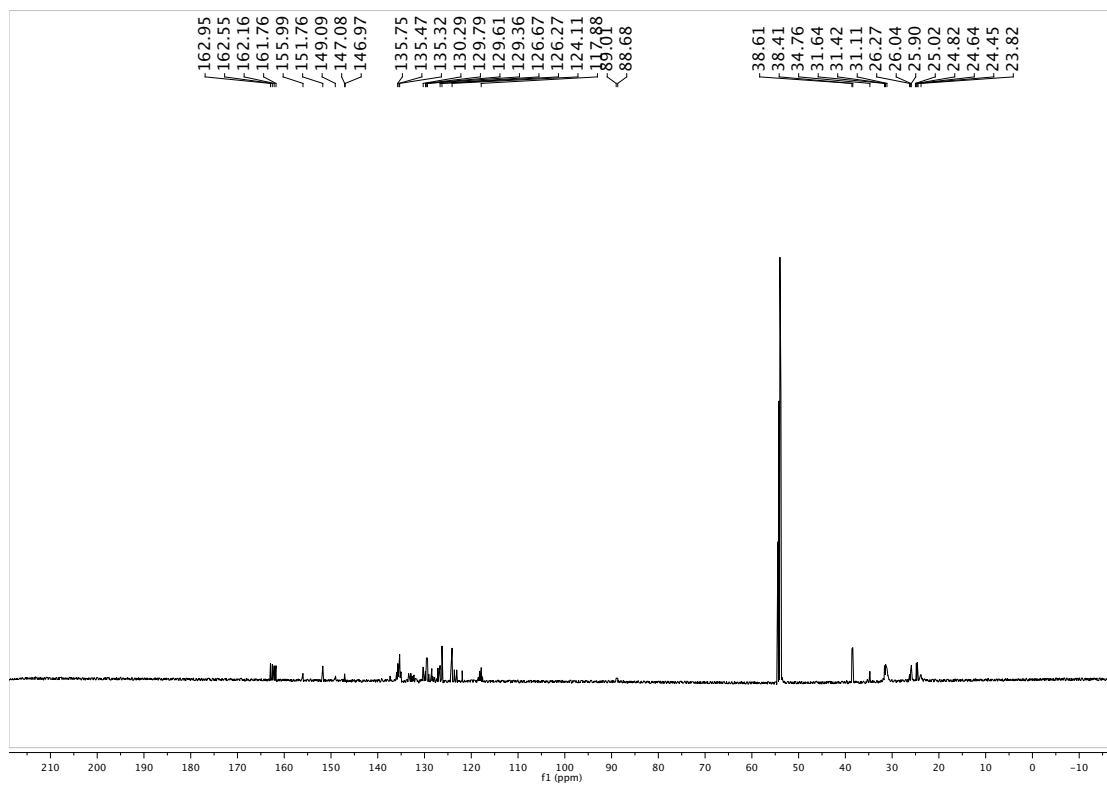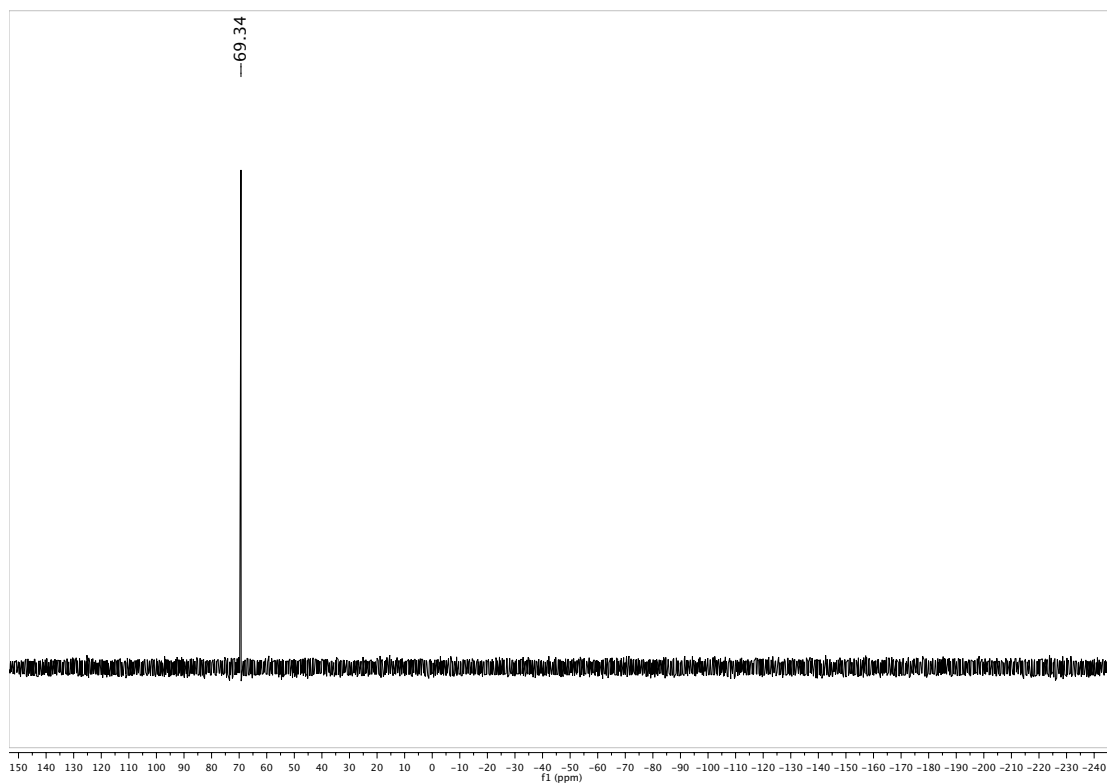

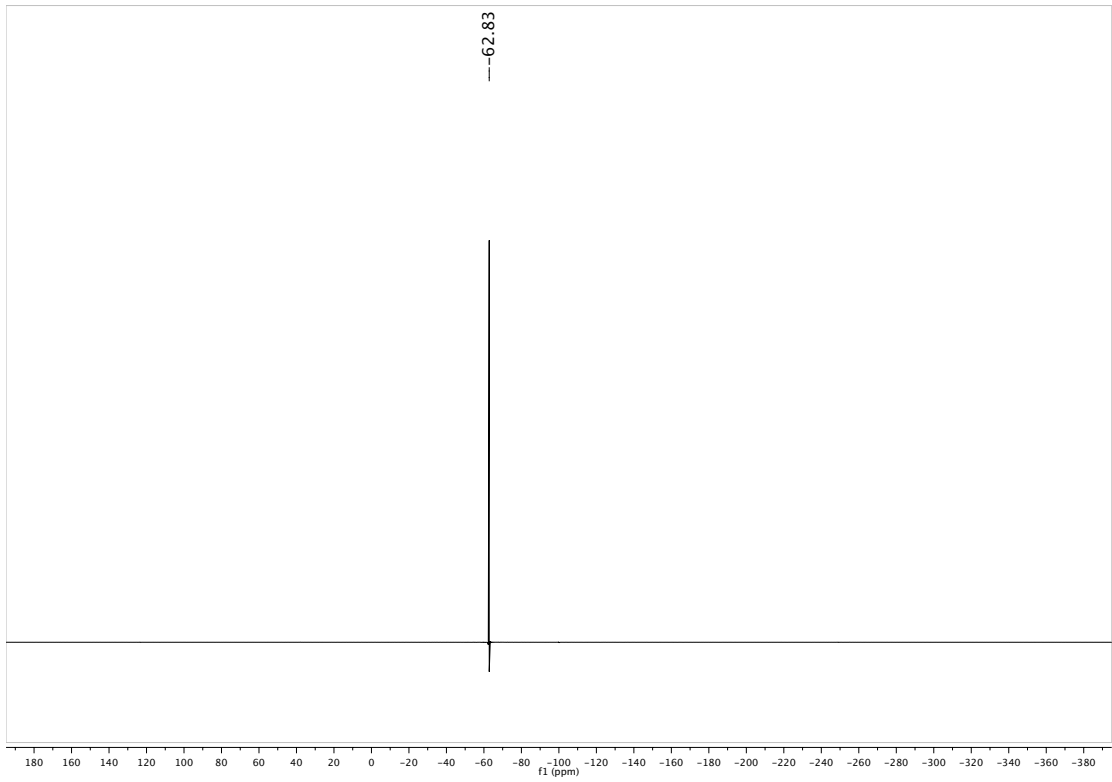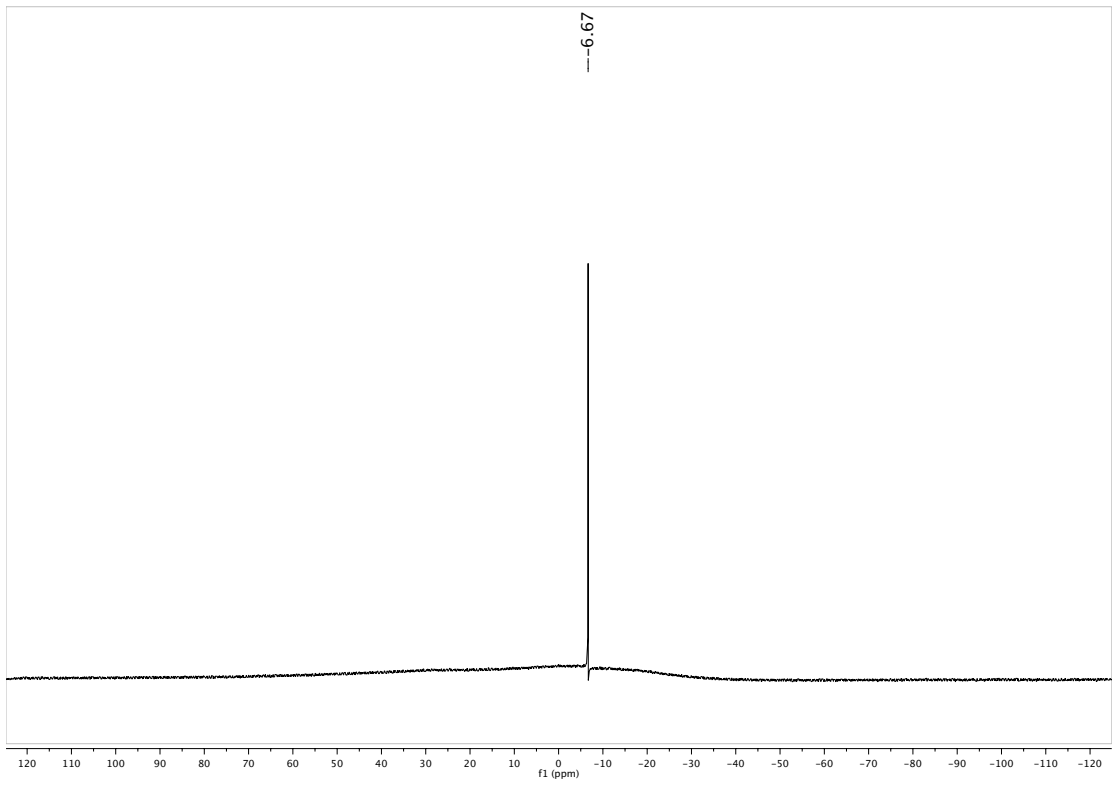



{Phenylethynyl[(2',4',6'-triisopropyl-1,1'-biphenyl-2-yl)di-tert-butylphosphine]gold(I)}

[(2',4',6'-triisopropyl-1,1'-biphenyl-2-yl)di-tert-butylphosphine]gold(I)

tetrakis[3,5-bis(trifluoromethyl)phenyl] borate (9b)

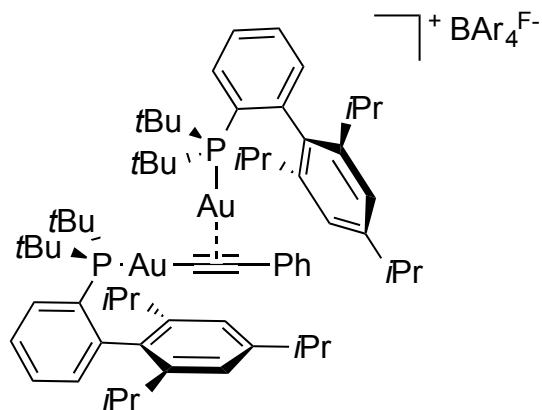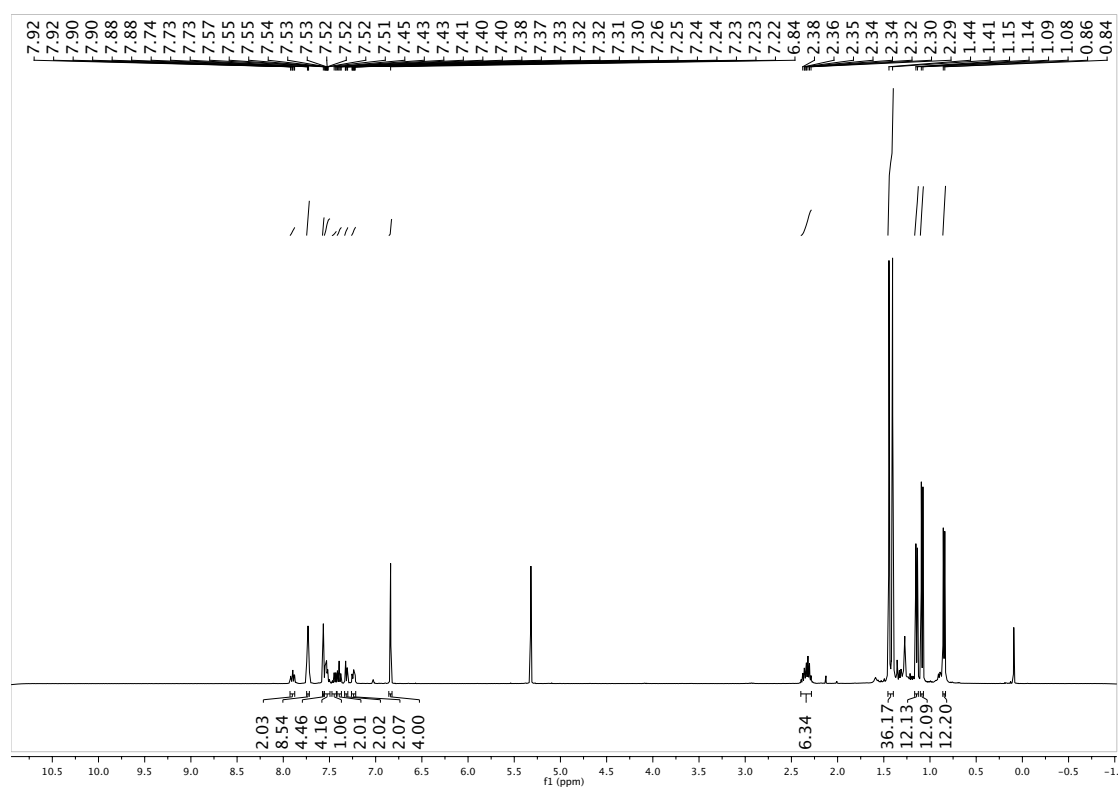

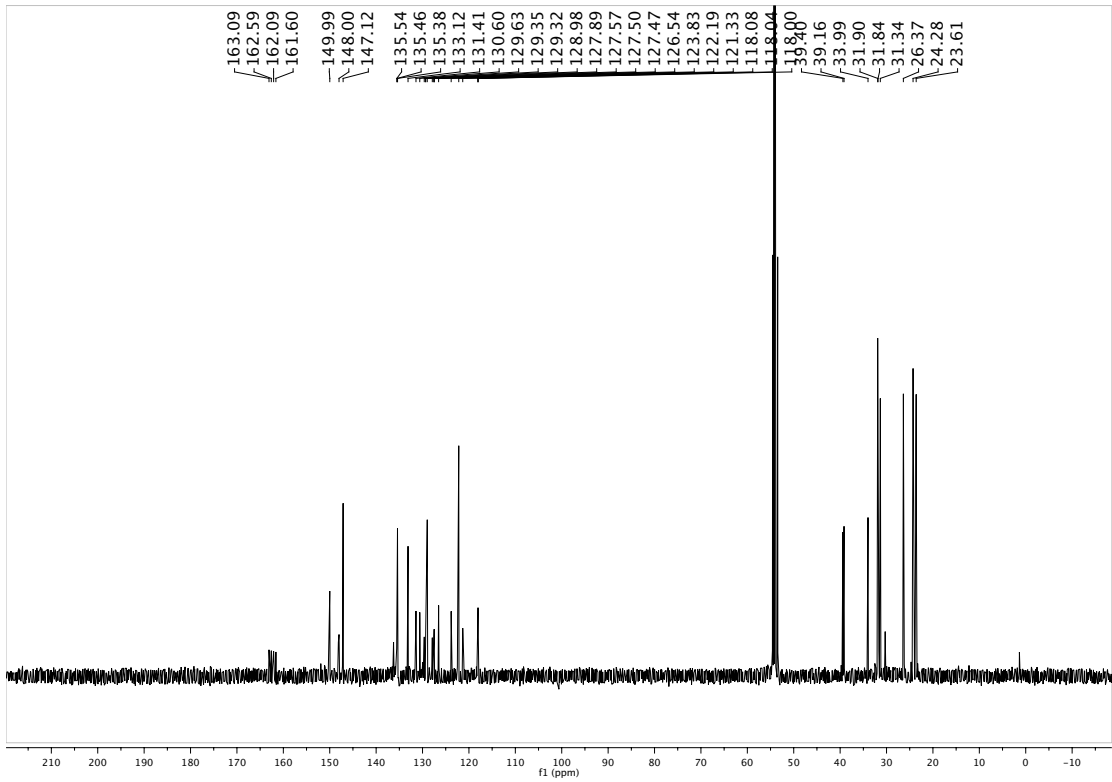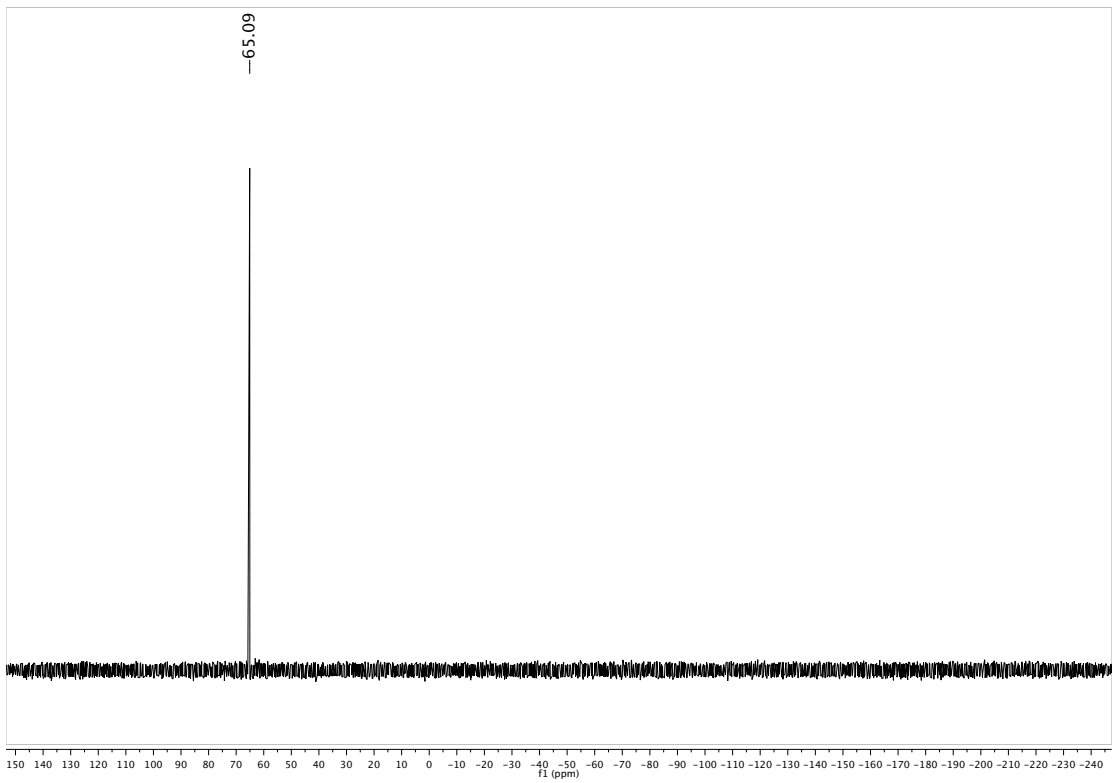

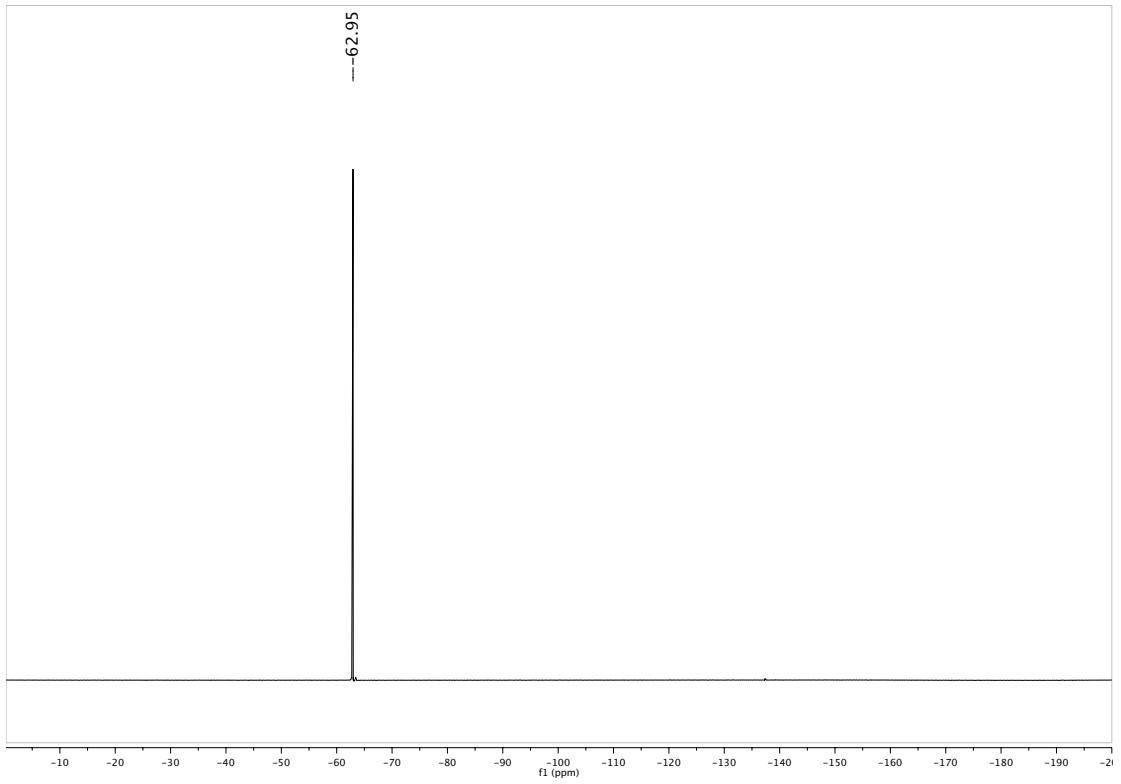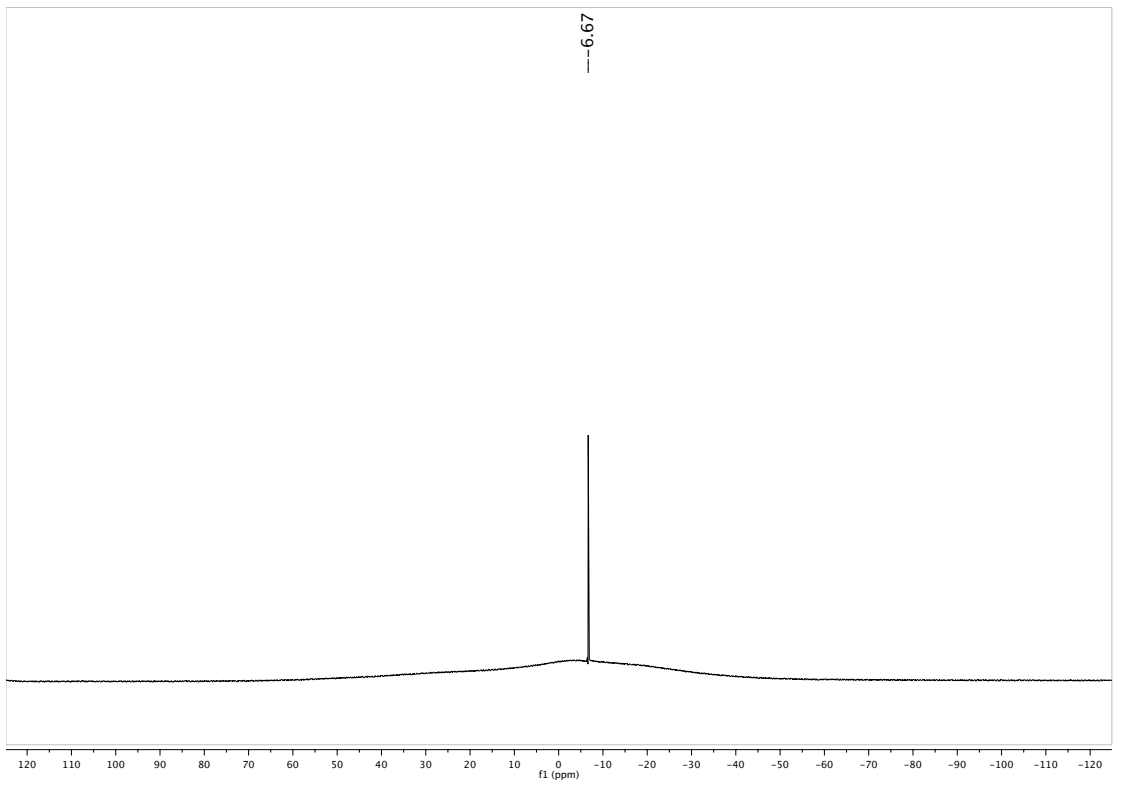

# Methoxy-3-(3-methyl-3-phenylcyclobut-1-en-1-yl)benzene (3g)

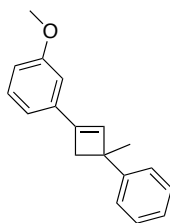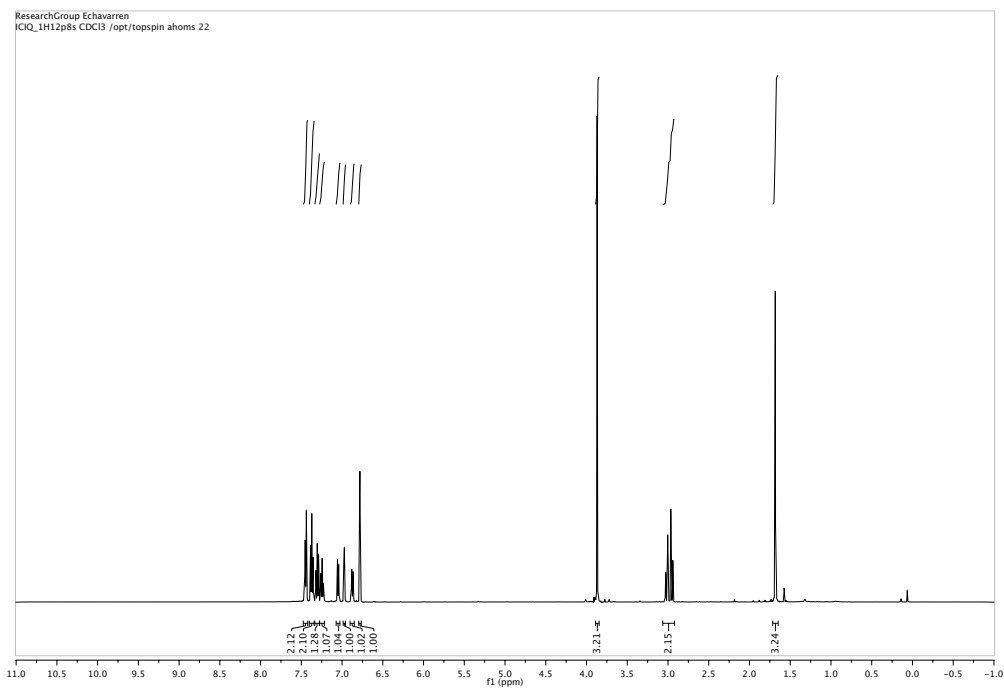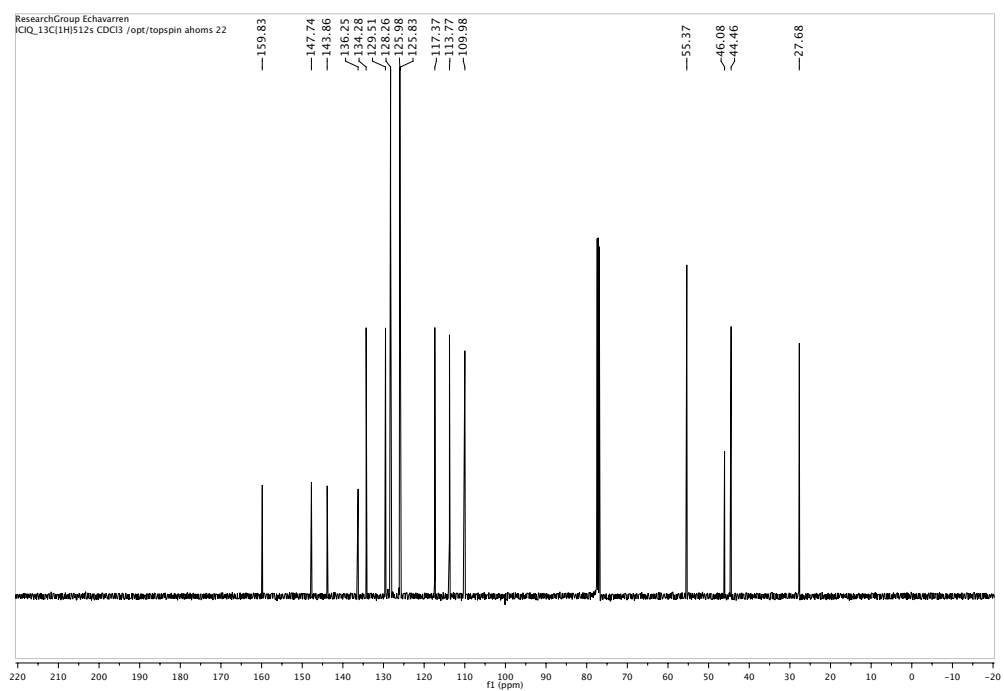

# 1-Fluoro-3-(3-methyl-3-phenylcyclobut-1-en-1-yl)benzene (3j)

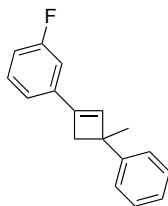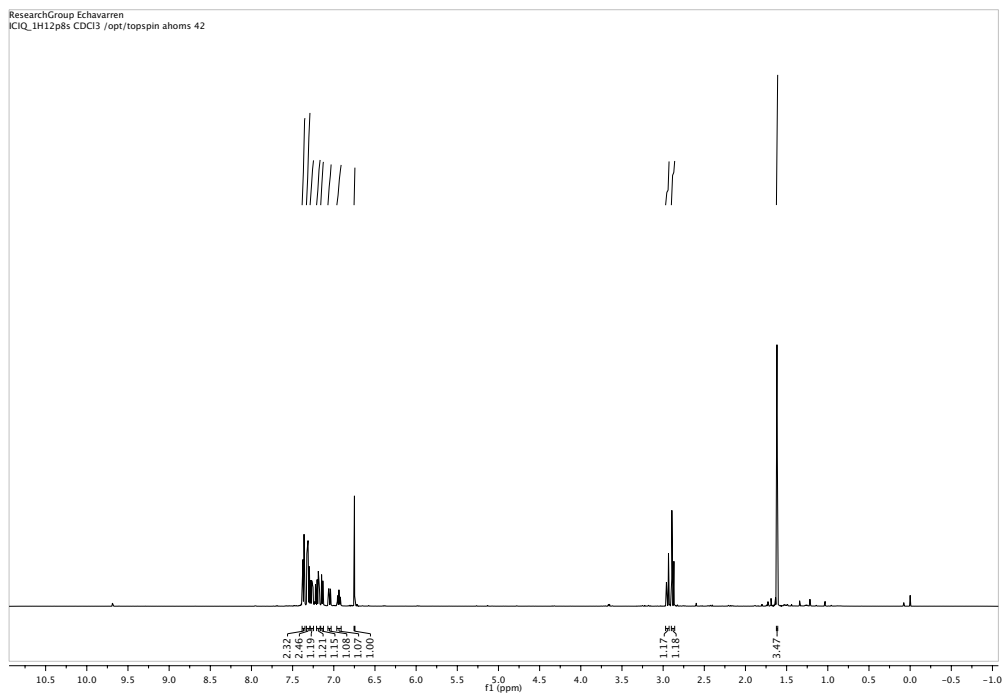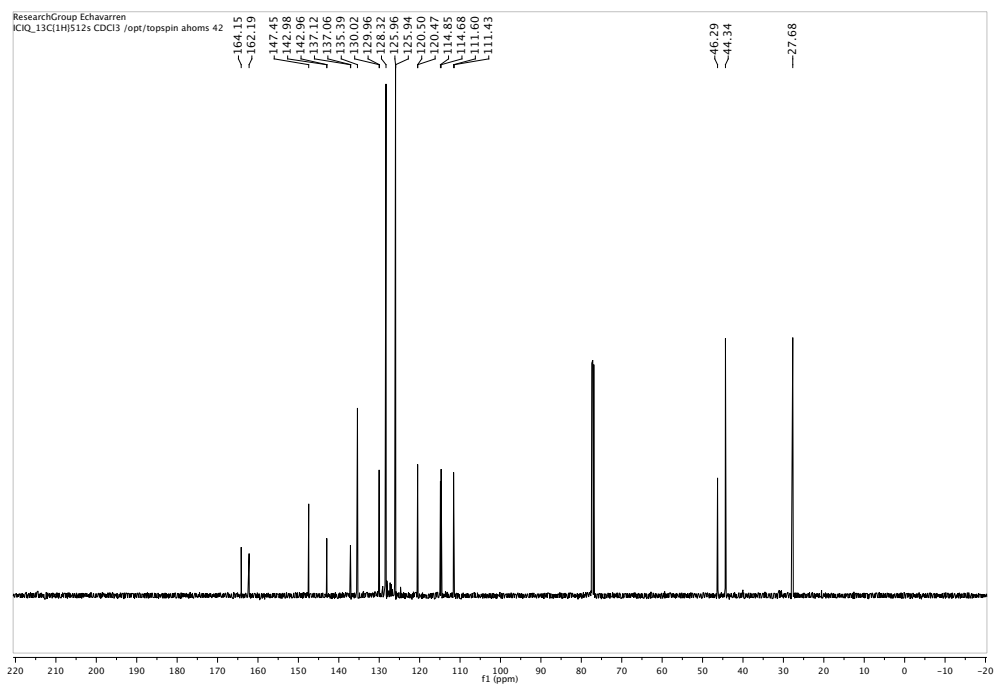

# 1-Chloro-3-(3-methyl-3-phenylcyclobut-1-en-1-yl)benzene (3k)

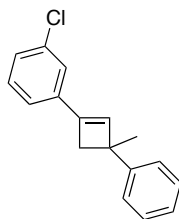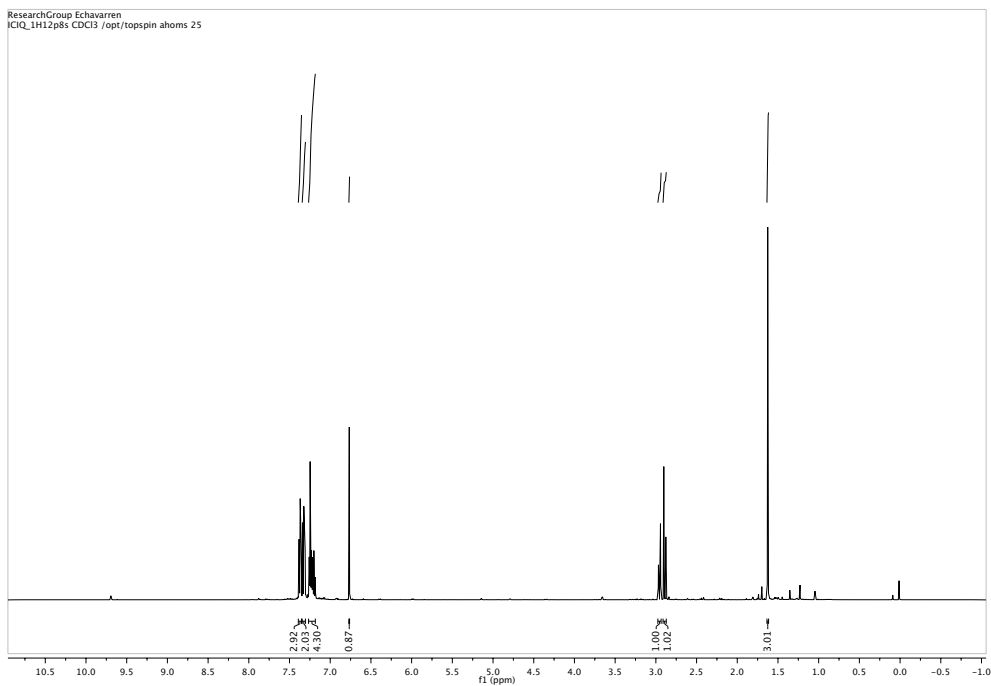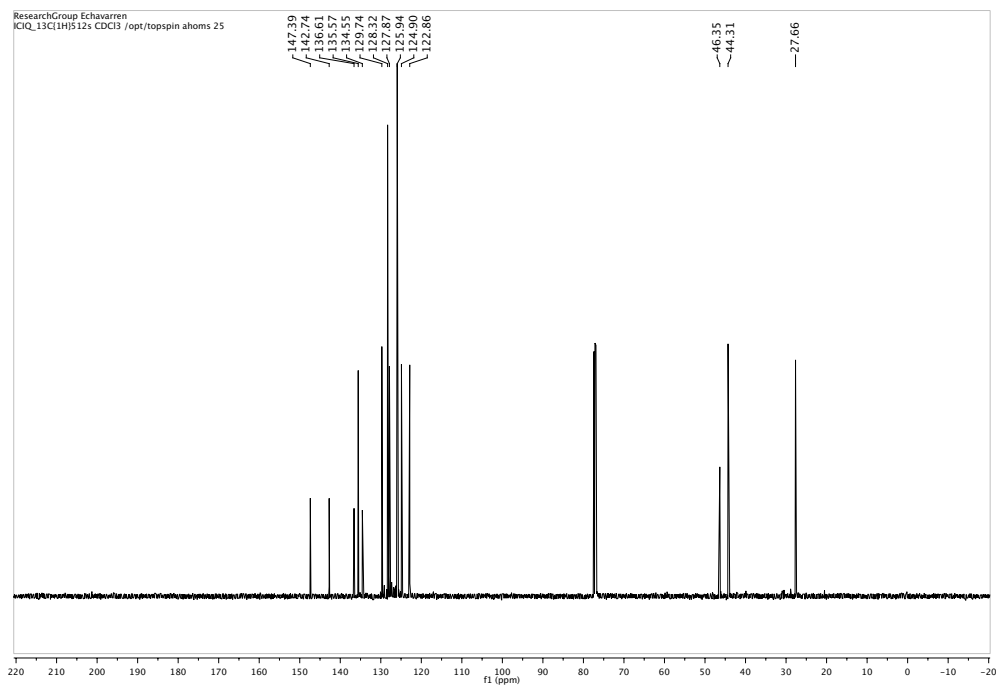

# 1-Methoxy-3-(3-methyl-3-phenylcyclobut-1-en-1-yl)benzene (3l)

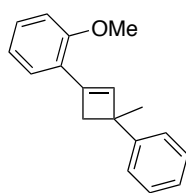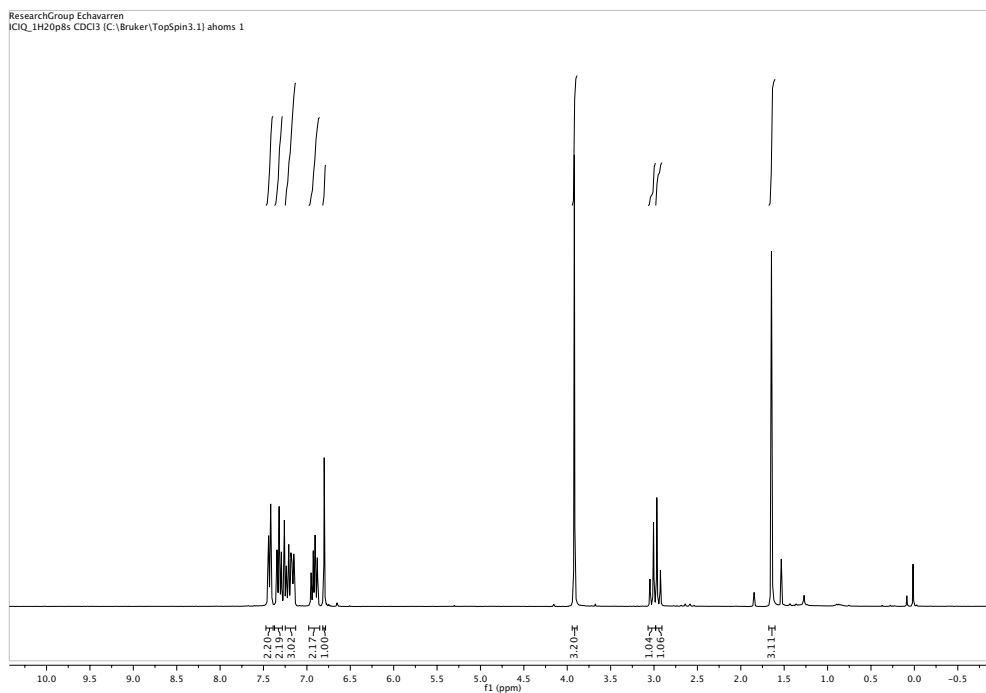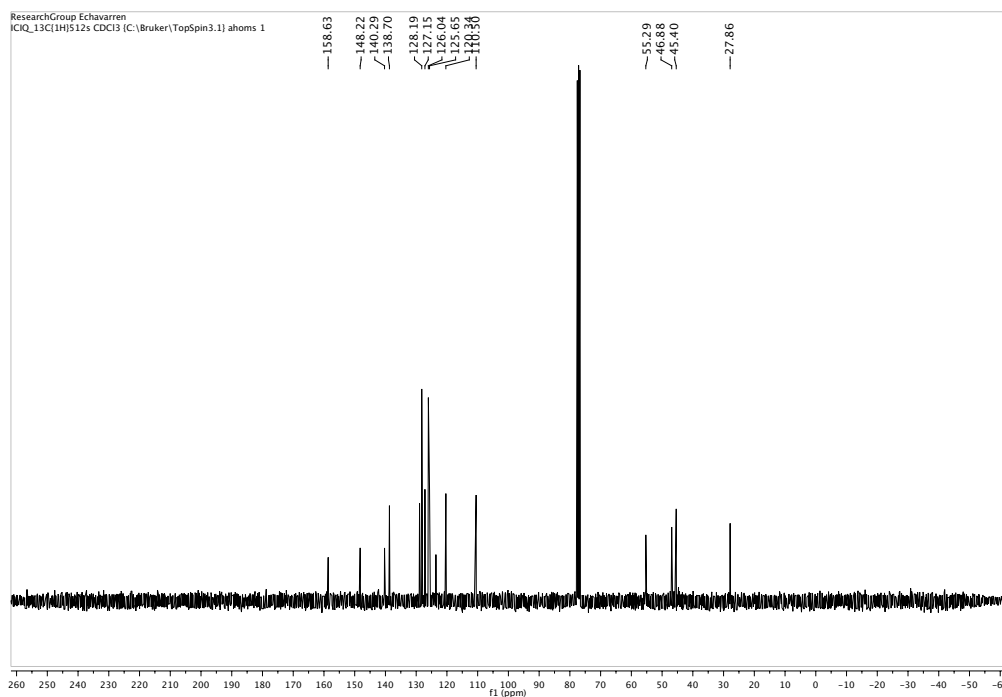

### 3-(3-Methyl-3-phenylcyclobut-1-en-1-yl)thiophene (3m)

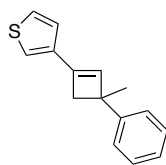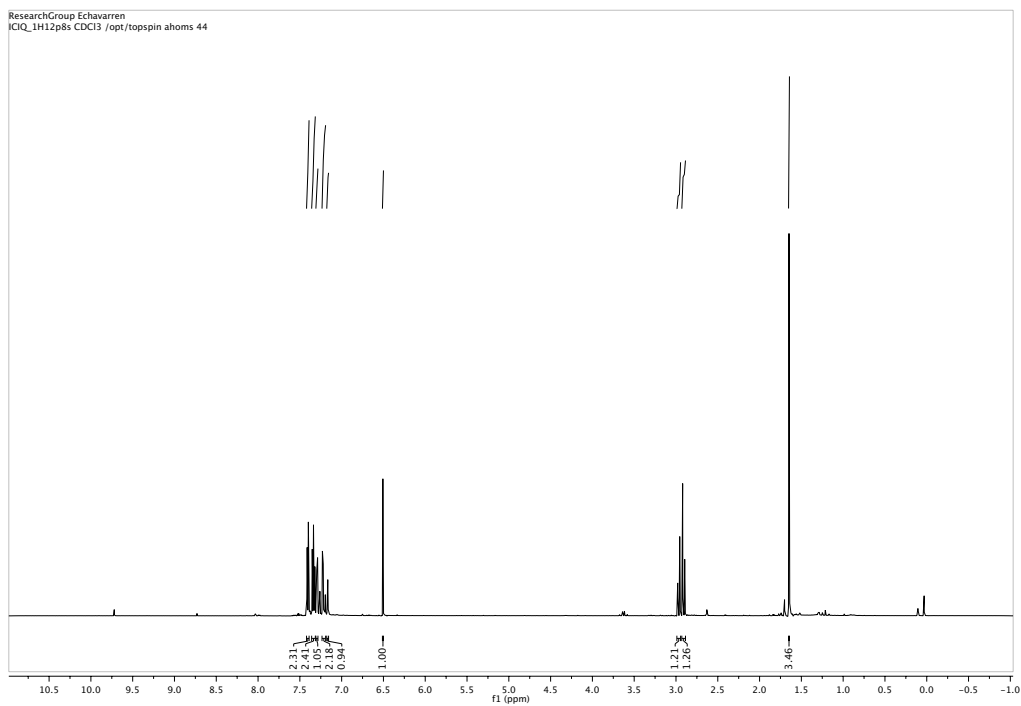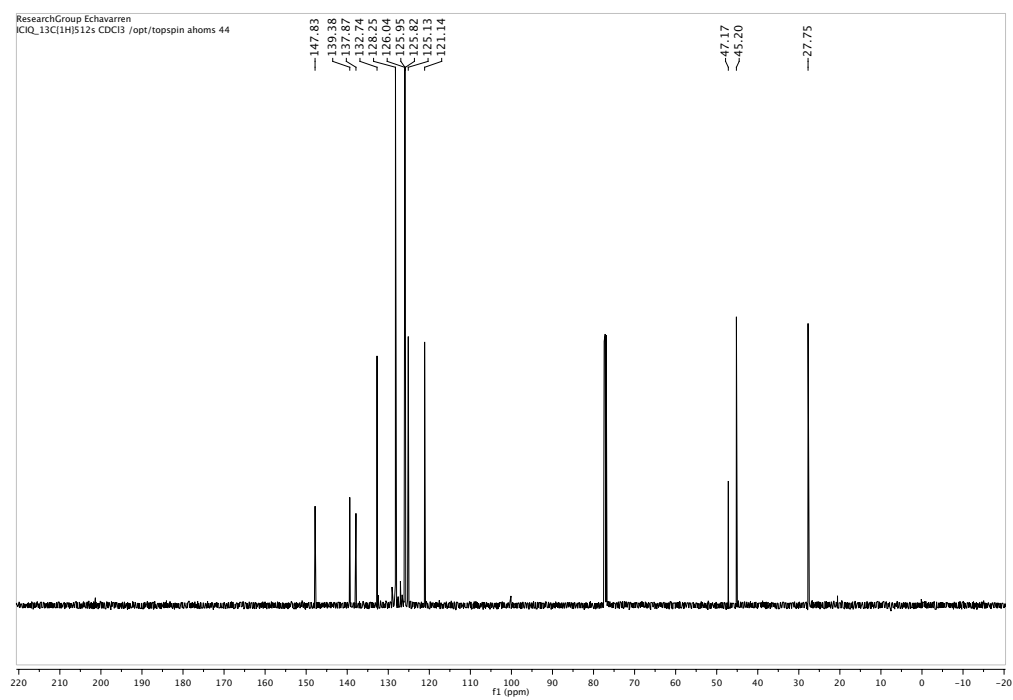



# Triisopropyl((1-methyl-3-phenylcyclobut-2-en-1-yl)methyl)silane (3q)

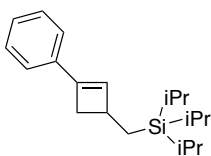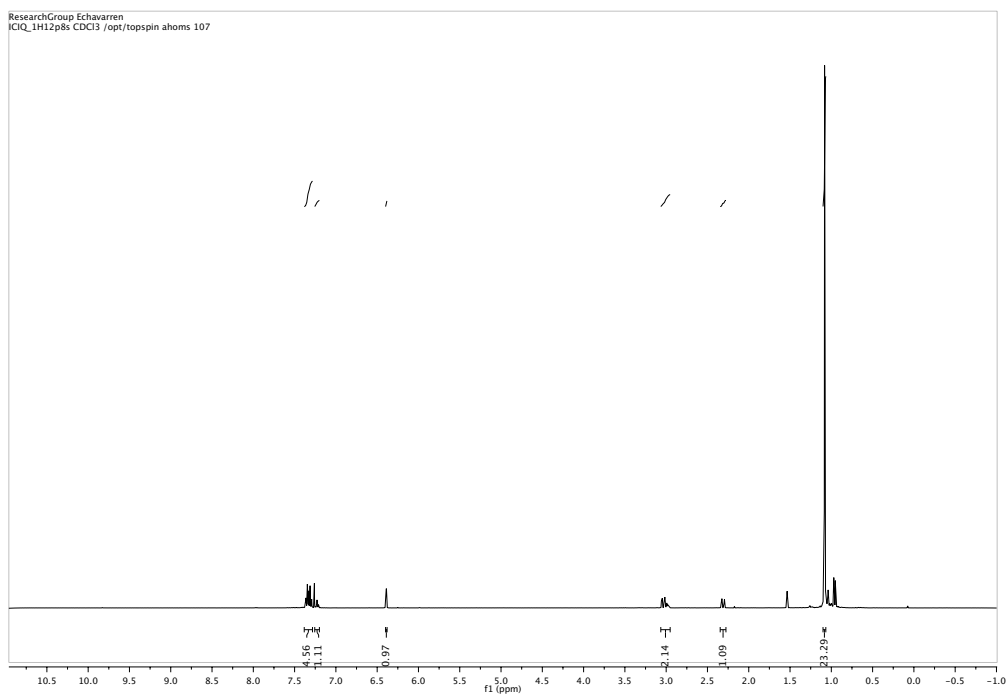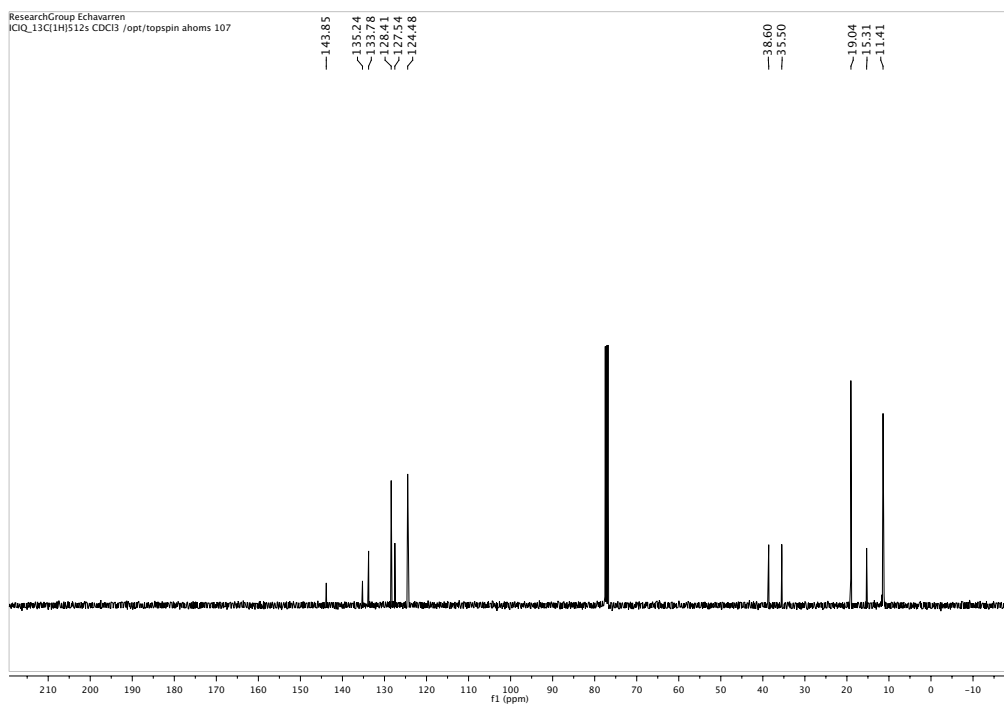

### (3-Methyl-3-(phenoxymethyl)cyclobut-1-en-1-yl)benzene (3r)

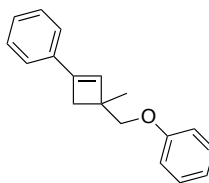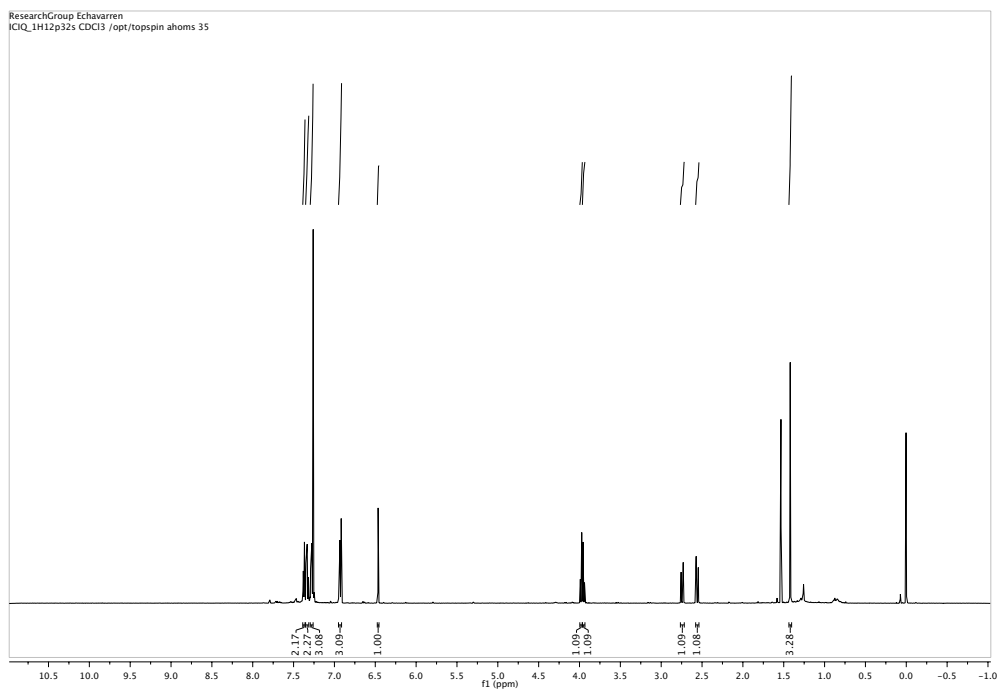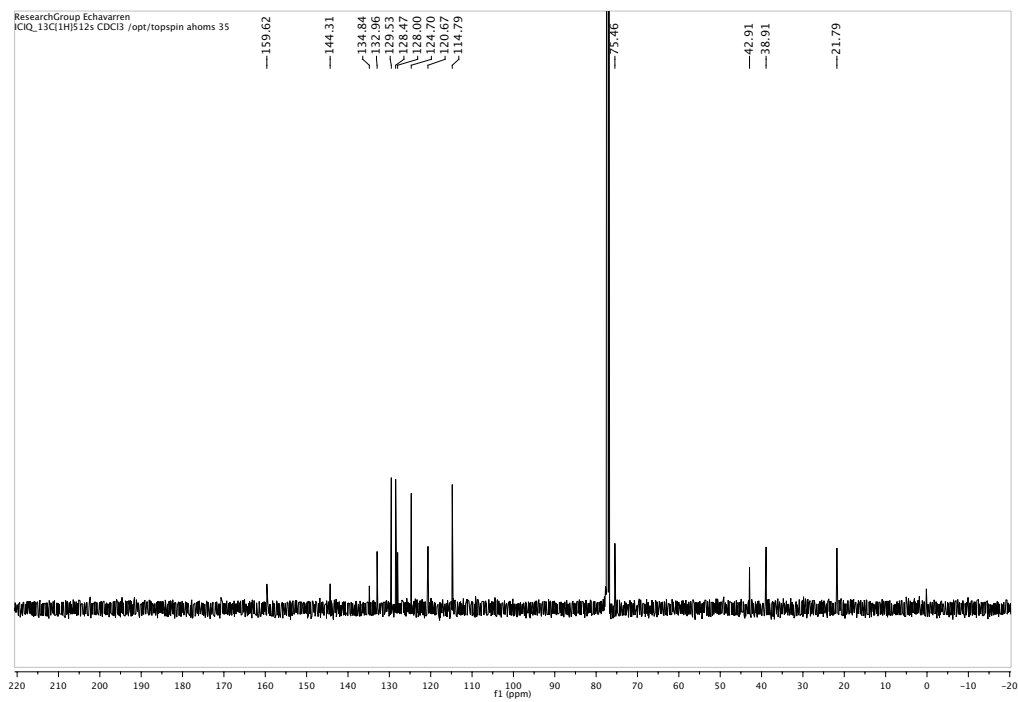

# ((1-methyl-3-phenylcyclobut-2-en-1-yl)methoxy)triphenylsilane (3s)

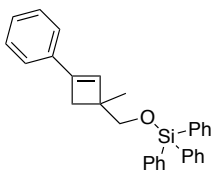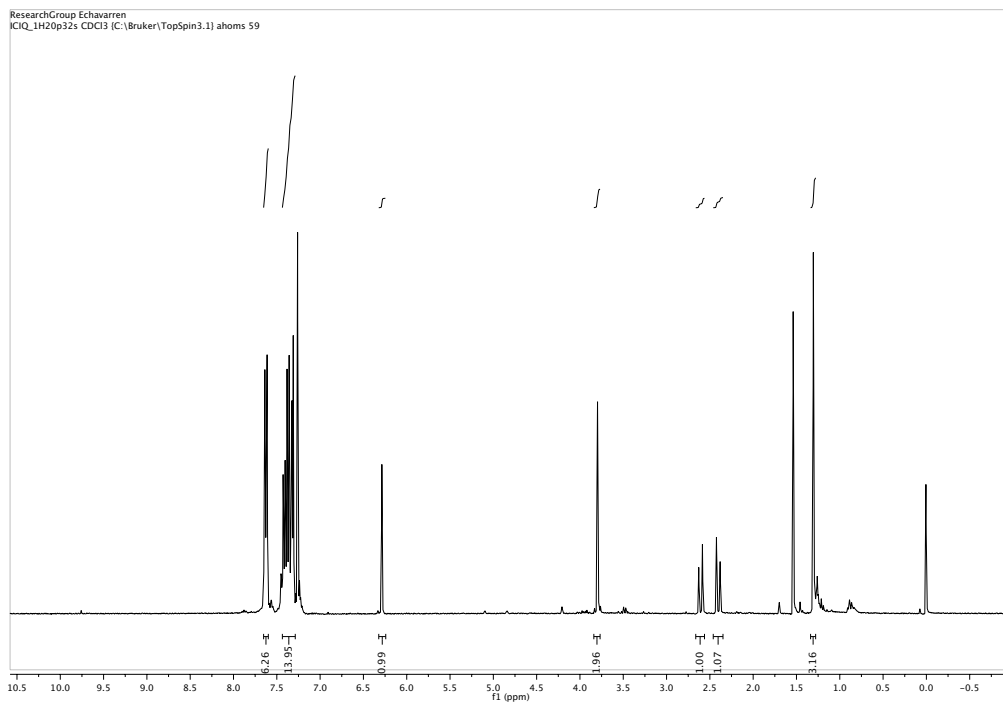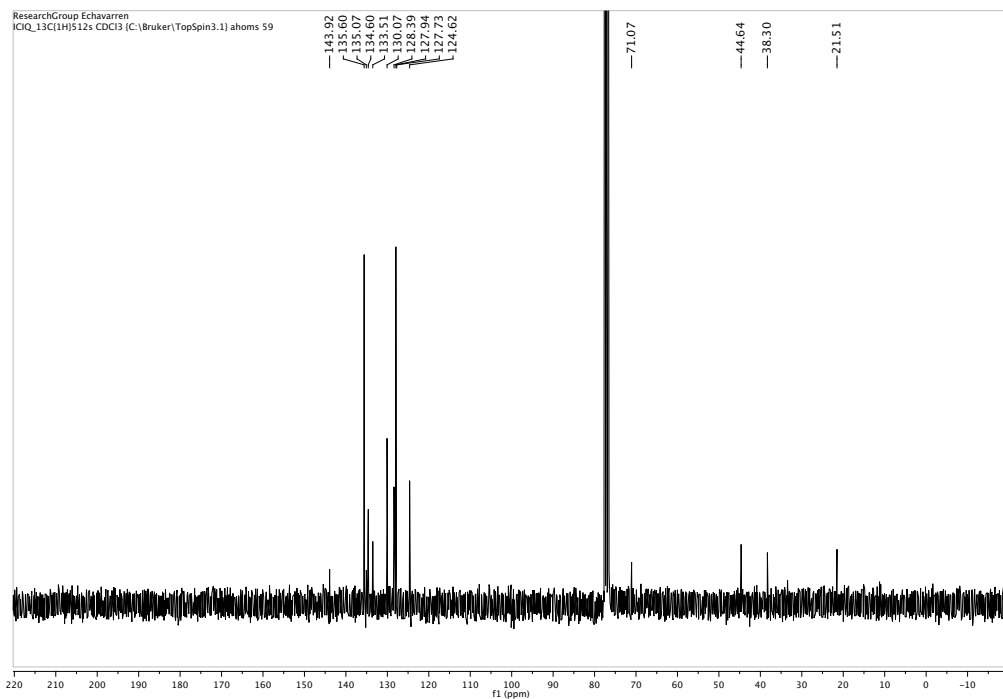

## 9. DFT's Data

Calculations were carried out with DFT using the M06 functional<sup>6</sup> as implemented in Gaussian 09.<sup>7</sup> The 6-31G(d) basis set<sup>8</sup> was used for all atoms except gold and antimony, which were treated with SDD and the associated effective core potential.<sup>9</sup> Frequency calculations were performed to characterize the stationary points as minima. The solvent effect was taken into account by single-point calculations using the polarizable continuum model (PCM),<sup>10, 11, 12, 13</sup> in particular IEF-PCM as implemented in Gaussian 09. Default options were used, except that individual spheres were placed on all hydrogen atoms to get a more accurate cavity. The calculations were performed using CH<sub>2</sub>Cl<sub>2</sub> ( $\epsilon = 8.93$ ) as solvent. The standard Gibbs energies in dichloromethane ( $\Delta G_{\text{DCM}}$ ) were obtained by adding the solvation energies to the gas phase Gibbs energies computed at 298 K. The same procedure was employed to calculate zero-point corrected energies in CH<sub>2</sub>Cl<sub>2</sub>.

- 
- [6] (a) A. D. J. Becke, *Chem. Phys.* **1993**, *98*, 5648–5652; (b) C. T. Lee, W. T. Yang, R. G. Parr, *Phys. Rev. B* **1988**, *37*, 785–789; (c) P. J. Stephens, F. J. Devlin, C. F. Chabalowski, M. J. Frisch, *J. Phys. Chem.* **1994**, *98*, 11623–1627.
- [7] M. J. Frisch, G. W. Trucks, H. B. Schlegel, G. E. Scuseria, M. A. Robb, J. R. Cheeseman, G. Scalmani, V. Barone, B. Mennucci, G. A. Petersson, H. Nakatsuji, M. Caricato, X. Li, H. P. Hratchian, A. F. Izmaylov, J. Bloino, G. Zheng, J. L. Sonnenberg, M. Hada, M. Ehara, K. Toyota, R. Fukuda, J. Hasegawa, M. Ishida, T. Nakajima, Y. Honda, O. Kitao, H. Nakai, T. Vreven, J. A. Montgomery, Jr., J. E. Peralta, F. Ogliaro, M. Bearpark, J. J. Heyd, E. Brothers, K. N. Kudin, K. N. Staroverov, R. Kobayashi, J. Normand, K. Raghavachari, A. Rendell, J. C. Burant, S. S. Iyengar, J. Tomasi, M. Cossi, N. Rega, N. J. Millam, M. Klene, J. E. Knox, J. B. Cross, V. Bakken, C. Adamo, J. Jaramillo, R. Gomperts, R. E. Stratmann, O. Yazyev, A. J. Austin, R. Cammi, C. Pomelli, J. W. Ochterski, R. L. Martin, K. Morokuma, V. G. Zakrzewski, G. A. Voth, P. Salvador, J. J. Dannenberg, S. Dapprich, A. D. Daniels, O. Farkas, J. B. Foresman, J. V. Ortiz, J. Cioslowski, D. J. Fox, Gaussian 09, revision 02; Gaussian, Inc.: Wallingford, CT, **2009**.
- [8] (a) M. M. Francl, W. J. Pietro, W. J. Hehre, J. S. Binkley, M. S. Gordon, D. J. Defrees, J. A. Pople, *J. Chem. Phys.* **1982**, *77*, 3654–3665. (b) W. J. Hehre, R. Ditchfield, J. A. Pople, *J. Chem. Phys.* **1972**, *56*, 2257–2261.
- [9] D. Andrae, U. Haussermann, M. Dolg, H. Stoll and H. Preuss, *Theor. Chim. Acta* **1990**, *77*, 123–141.
- [10] E. Cancès, B. Mennucci and J. J. Tomasi, *Chem. Phys.* **1997**, *107*, 3032–3041.
- [11] M. Cossi, V. Barone, B. Mennucci and J. Tomasi, *Chem. Phys. Lett.* **1998**, *286*, 253–260.
- [12] B. Mennucci and J. J. Tomasi, *Chem. Phys.* **1997**, *106*, 5151–5158.
- [13] S. Miertus and J. Tomasi, *J. Chem. Phys.* **1982**, *65*, 239–245.

Table S4. *t*BuXPhosAu( $\eta^2$ -phenylacetylene)SbF<sub>6</sub> complex **8a**.

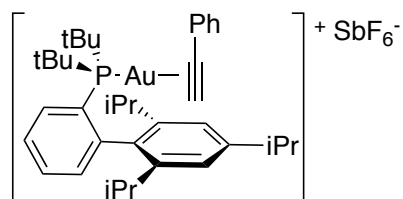

| Center Number | Atomic Number | Cartesian Coordinates (Angstroms) |           |           |
|---------------|---------------|-----------------------------------|-----------|-----------|
|               |               | X                                 | Y         | Z         |
| 1             | 15            | -1.422089                         | -2.087430 | -0.406163 |
| 2             | 6             | 0.178809                          | -2.717519 | -1.210447 |
| 3             | 6             | -2.315312                         | -3.445661 | 0.587625  |
| 4             | 79            | -0.943476                         | -0.292388 | 1.039915  |
| 5             | 6             | 1.395771                          | -1.236041 | 4.094960  |
| 6             | 6             | 2.476061                          | -2.083819 | 4.289297  |
| 7             | 6             | 3.632799                          | -1.930782 | 3.521641  |
| 8             | 6             | 3.722800                          | -0.923044 | 2.564055  |
| 9             | 6             | 2.653997                          | -0.059505 | 2.371179  |
| 10            | 6             | 1.487414                          | -0.218565 | 3.131894  |
| 11            | 1             | 0.478428                          | -1.352080 | 4.670298  |
| 12            | 1             | 2.415871                          | -2.873741 | 5.034892  |
| 13            | 1             | 4.468896                          | -2.611566 | 3.670334  |
| 14            | 1             | 4.606758                          | -0.815782 | 1.938790  |
| 15            | 1             | 2.713905                          | 0.719084  | 1.614445  |
| 16            | 6             | 0.372543                          | 0.619682  | 2.843818  |
| 17            | 6             | -0.578118                         | 1.336872  | 2.511143  |
| 18            | 1             | -1.250210                         | 2.179512  | 2.482791  |
| 19            | 6             | -2.521079                         | -1.508618 | -1.757237 |
| 20            | 6             | -2.942910                         | -2.458642 | -2.701747 |
| 21            | 6             | -2.929185                         | -0.160041 | -1.913783 |
| 22            | 6             | -3.710865                         | -2.111878 | -3.804066 |
| 23            | 1             | -2.670454                         | -3.504659 | -2.572889 |
| 24            | 6             | -3.686360                         | 0.165755  | -3.048736 |
| 25            | 6             | -4.069048                         | -0.782332 | -3.987926 |
| 26            | 1             | -4.021493                         | -2.876278 | -4.512846 |
| 27            | 1             | -3.995633                         | 1.203495  | -3.177013 |
| 28            | 1             | -4.659754                         | -0.483181 | -4.851463 |
| 29            | 6             | -2.207064                         | -4.857154 | 0.012100  |
| 30            | 1             | -2.837262                         | -5.519614 | 0.623347  |
| 31            | 1             | -2.569657                         | -4.934737 | -1.020190 |
| 32            | 1             | -1.186320                         | -5.255319 | 0.060004  |
| 33            | 6             | -1.731936                         | -3.455204 | 2.006044  |
| 34            | 1             | -0.648582                         | -3.630968 | 2.021887  |
| 35            | 1             | -1.929286                         | -2.511627 | 2.534066  |
| 36            | 1             | -2.209893                         | -4.265366 | 2.576326  |
| 37            | 6             | -3.790507                         | -3.061358 | 0.676080  |

|    |   |           |           |           |
|----|---|-----------|-----------|-----------|
| 38 | 1 | -4.296538 | -3.764915 | 1.352881  |
| 39 | 1 | -3.924961 | -2.053866 | 1.089104  |
| 40 | 1 | -4.294554 | -3.109209 | -0.298016 |
| 41 | 6 | 0.012396  | -3.843504 | -2.231236 |
| 42 | 1 | 1.013628  | -4.103974 | -2.603638 |
| 43 | 1 | -0.427729 | -4.756061 | -1.819504 |
| 44 | 1 | -0.577633 | -3.525609 | -3.099561 |
| 45 | 6 | 1.121940  | -3.164539 | -0.091453 |
| 46 | 1 | 2.108412  | -3.373523 | -0.529670 |
| 47 | 1 | 1.263171  | -2.384428 | 0.671898  |
| 48 | 1 | 0.782432  | -4.084595 | 0.402380  |
| 49 | 6 | 0.800560  | -1.530728 | -1.941707 |
| 50 | 1 | 0.996365  | -0.682804 | -1.276899 |
| 51 | 1 | 1.772654  | -1.841260 | -2.350582 |
| 52 | 1 | 0.175829  | -1.200321 | -2.782974 |
| 53 | 6 | -2.732826 | 0.990198  | -0.961387 |
| 54 | 6 | -3.752055 | 1.274863  | -0.022731 |
| 55 | 6 | -1.683198 | 1.922320  | -1.142118 |
| 56 | 6 | -3.688261 | 2.454369  | 0.722956  |
| 57 | 6 | -1.667842 | 3.084627  | -0.371356 |
| 58 | 6 | -2.657280 | 3.376182  | 0.565478  |
| 59 | 1 | -4.484595 | 2.661317  | 1.438467  |
| 60 | 1 | -0.855194 | 3.801743  | -0.509693 |
| 61 | 6 | -0.590425 | 1.722098  | -2.169257 |
| 62 | 1 | -0.655685 | 0.687509  | -2.532601 |
| 63 | 6 | -2.613568 | 4.688707  | 1.318162  |
| 64 | 1 | -1.550090 | 4.927528  | 1.490957  |
| 65 | 6 | -3.315862 | 4.651396  | 2.669455  |
| 66 | 1 | -2.957929 | 3.829624  | 3.305337  |
| 67 | 1 | -3.147305 | 5.592218  | 3.208310  |
| 68 | 1 | -4.402896 | 4.535367  | 2.553696  |
| 69 | 6 | -3.205963 | 5.798210  | 0.447231  |
| 70 | 1 | -3.150128 | 6.769435  | 0.956727  |
| 71 | 1 | -2.679217 | 5.882823  | -0.512046 |
| 72 | 1 | -4.263941 | 5.586244  | 0.232854  |
| 73 | 6 | 0.804760  | 1.930955  | -1.582795 |
| 74 | 1 | 0.929571  | 1.414150  | -0.617706 |
| 75 | 1 | 1.583386  | 1.552963  | -2.256434 |
| 76 | 1 | 1.016572  | 2.996283  | -1.413388 |
| 77 | 6 | -0.806861 | 2.636186  | -3.375870 |
| 78 | 1 | -0.777328 | 3.694160  | -3.078118 |
| 79 | 1 | -0.019419 | 2.477086  | -4.124778 |
| 80 | 1 | -1.776795 | 2.450164  | -3.856526 |
| 81 | 6 | -4.958583 | 0.375415  | 0.157931  |
| 82 | 1 | -4.740195 | -0.591425 | -0.318854 |
| 83 | 6 | -5.279072 | 0.112976  | 1.628509  |
| 84 | 1 | -5.690201 | 1.005410  | 2.119980  |
| 85 | 1 | -6.032370 | -0.681361 | 1.719203  |
| 86 | 1 | -4.386530 | -0.192047 | 2.195156  |
| 87 | 6 | -6.178952 | 0.965784  | -0.550559 |

|    |    |           |           |           |
|----|----|-----------|-----------|-----------|
| 88 | 1  | -7.050506 | 0.308002  | -0.431735 |
| 89 | 1  | -6.437181 | 1.947537  | -0.128395 |
| 90 | 1  | -5.996509 | 1.098818  | -1.625022 |
| 91 | 51 | 4.878765  | 0.695626  | -0.895334 |
| 92 | 9  | 4.675845  | 1.588450  | 0.756587  |
| 93 | 9  | 3.962476  | 2.095020  | -1.756329 |
| 94 | 9  | 3.242205  | -0.191430 | -0.576019 |
| 95 | 9  | 6.513745  | 1.572119  | -1.181054 |
| 96 | 9  | 5.785981  | -0.701720 | -0.005614 |
| 97 | 9  | 5.041606  | -0.223877 | -2.525713 |

Table S5. *t*BuXPhosAu( $\eta^2$ -phenylacetylene)BAR<sub>4</sub><sup>F</sup> complex **8b**.

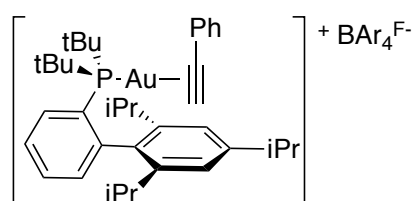

| Center Number | Atomic Number | Cartesian Coordinates (Angstroms) |           |           |
|---------------|---------------|-----------------------------------|-----------|-----------|
|               |               | X                                 | Y         | Z         |
| 1             | 15            | 3.641376                          | 0.755852  | 1.739381  |
| 2             | 6             | 4.916324                          | 1.995204  | 2.424096  |
| 3             | 6             | 1.848076                          | 1.268603  | 2.087464  |
| 4             | 79            | 3.950976                          | 0.645668  | -0.591248 |
| 5             | 6             | 3.784318                          | 4.113133  | -2.484423 |
| 6             | 6             | 4.011281                          | 5.445271  | -2.172235 |
| 7             | 6             | 5.279575                          | 5.857811  | -1.766556 |
| 8             | 6             | 6.326712                          | 4.940908  | -1.675916 |
| 9             | 6             | 6.109219                          | 3.604323  | -1.978139 |
| 10            | 6             | 4.831427                          | 3.185986  | -2.379969 |
| 11            | 1             | 2.801351                          | 3.775331  | -2.803879 |
| 12            | 1             | 3.196793                          | 6.162855  | -2.245709 |
| 13            | 1             | 5.455620                          | 6.903334  | -1.521771 |
| 14            | 1             | 7.315097                          | 5.270962  | -1.364086 |
| 15            | 1             | 6.914328                          | 2.875095  | -1.900986 |
| 16            | 6             | 4.570481                          | 1.805394  | -2.627195 |
| 17            | 6             | 4.329609                          | 0.607196  | -2.800594 |
| 18            | 1             | 4.207555                          | -0.353705 | -3.272789 |
| 19            | 6             | 3.963634                          | -0.862643 | 2.556692  |
| 20            | 6             | 3.875641                          | -0.903891 | 3.958845  |
| 21            | 6             | 4.331589                          | -2.045996 | 1.866870  |
| 22            | 6             | 4.172136                          | -2.047551 | 4.686718  |
| 23            | 1             | 3.575813                          | -0.015903 | 4.508344  |
| 24            | 6             | 4.659037                          | -3.176066 | 2.629729  |

|    |   |           |           |           |
|----|---|-----------|-----------|-----------|
| 25 | 6 | 4.586886  | -3.190029 | 4.015366  |
| 26 | 1 | 4.086564  | -2.036865 | 5.770980  |
| 27 | 1 | 4.959224  | -4.079522 | 2.098446  |
| 28 | 1 | 4.842821  | -4.093881 | 4.564575  |
| 29 | 6 | 1.540690  | 1.609276  | 3.543081  |
| 30 | 1 | 0.480108  | 1.886354  | 3.613879  |
| 31 | 1 | 1.696768  | 0.762253  | 4.222365  |
| 32 | 1 | 2.114988  | 2.471529  | 3.903443  |
| 33 | 6 | 1.472820  | 2.465486  | 1.211921  |
| 34 | 1 | 1.987563  | 3.391321  | 1.490173  |
| 35 | 1 | 1.661735  | 2.270074  | 0.145619  |
| 36 | 1 | 0.391991  | 2.641005  | 1.333667  |
| 37 | 6 | 0.988368  | 0.088642  | 1.641858  |
| 38 | 1 | -0.072745 | 0.366362  | 1.733996  |
| 39 | 1 | 1.167293  | -0.162903 | 0.586082  |
| 40 | 1 | 1.152440  | -0.807351 | 2.253944  |
| 41 | 6 | 5.017016  | 2.069411  | 3.948653  |
| 42 | 1 | 5.700223  | 2.893347  | 4.200951  |
| 43 | 1 | 4.062303  | 2.278136  | 4.444497  |
| 44 | 1 | 5.443771  | 1.154961  | 4.375964  |
| 45 | 6 | 4.591415  | 3.387814  | 1.876945  |
| 46 | 1 | 5.459744  | 4.040123  | 2.051462  |
| 47 | 1 | 4.392970  | 3.388598  | 0.794322  |
| 48 | 1 | 3.737271  | 3.844304  | 2.391530  |
| 49 | 6 | 6.284199  | 1.569365  | 1.893030  |
| 50 | 1 | 6.332535  | 1.599401  | 0.796438  |
| 51 | 1 | 7.041504  | 2.266175  | 2.281029  |
| 52 | 1 | 6.561979  | 0.561233  | 2.229074  |
| 53 | 6 | 4.340109  | -2.281352 | 0.383114  |
| 54 | 6 | 3.200022  | -2.869277 | -0.216575 |
| 55 | 6 | 5.522384  | -2.131121 | -0.373623 |
| 56 | 6 | 3.251533  | -3.222967 | -1.563628 |
| 57 | 6 | 5.518501  | -2.504175 | -1.720642 |
| 58 | 6 | 4.392733  | -3.036589 | -2.341410 |
| 59 | 1 | 2.361391  | -3.657442 | -2.021349 |
| 60 | 1 | 6.432936  | -2.387410 | -2.306339 |
| 61 | 6 | 6.823333  | -1.671882 | 0.252355  |
| 62 | 1 | 6.590306  | -1.224151 | 1.229455  |
| 63 | 6 | 4.439518  | -3.458420 | -3.793625 |
| 64 | 1 | 5.371727  | -3.050717 | -4.220084 |
| 65 | 6 | 3.272116  | -2.916484 | -4.614685 |
| 66 | 1 | 3.186939  | -1.822486 | -4.554566 |
| 67 | 1 | 3.393996  | -3.185136 | -5.672046 |
| 68 | 1 | 2.313977  | -3.335310 | -4.278397 |
| 69 | 6 | 4.502854  | -4.981672 | -3.903353 |
| 70 | 1 | 4.592358  | -5.294923 | -4.952162 |
| 71 | 1 | 5.358981  | -5.387052 | -3.348719 |
| 72 | 1 | 3.589630  | -5.437625 | -3.494104 |
| 73 | 6 | 7.558163  | -0.623382 | -0.579589 |
| 74 | 1 | 6.895822  | 0.207924  | -0.865150 |



|     |   |           |           |           |
|-----|---|-----------|-----------|-----------|
| 75  | 1 | 8.399949  | -0.208037 | -0.008796 |
| 76  | 1 | 7.970824  | -1.051907 | -1.503560 |
| 77  | 6 | 7.734952  | -2.872179 | 0.513150  |
| 78  | 1 | 7.984612  | -3.383008 | -0.427800 |
| 79  | 1 | 8.674674  | -2.550042 | 0.981983  |
| 80  | 1 | 7.257626  | -3.605545 | 1.176469  |
| 81  | 6 | 1.954025  | -3.215464 | 0.577893  |
| 82  | 1 | 1.969605  | -2.644236 | 1.516442  |
| 83  | 6 | 0.654621  | -2.876481 | -0.146845 |
| 84  | 1 | 0.470886  | -3.547154 | -0.998095 |
| 85  | 1 | -0.191968 | -2.993370 | 0.543031  |
| 86  | 1 | 0.648428  | -1.848483 | -0.528168 |
| 87  | 6 | 1.948775  | -4.700265 | 0.948795  |
| 88  | 1 | 1.050037  | -4.942079 | 1.531990  |
| 89  | 1 | 1.941811  | -5.324211 | 0.043144  |
| 90  | 1 | 2.826871  | -4.981884 | 1.543404  |
| 91  | 5 | -3.570401 | 0.020412  | -0.032033 |
| 92  | 6 | -4.243384 | -1.312157 | -0.701972 |
| 93  | 6 | -4.341034 | -1.477500 | -2.089673 |
| 94  | 6 | -4.903964 | -2.277345 | 0.068836  |
| 95  | 6 | -5.028682 | -2.541744 | -2.669380 |
| 96  | 1 | -3.872576 | -0.747601 | -2.753700 |
| 97  | 6 | -5.590141 | -3.348094 | -0.501147 |
| 98  | 1 | -4.893747 | -2.196225 | 1.158019  |
| 99  | 6 | -5.656470 | -3.497658 | -1.880479 |
| 100 | 1 | -6.187636 | -4.331936 | -2.329514 |
| 101 | 6 | -4.806890 | 1.094873  | -0.003444 |
| 102 | 6 | -5.730068 | 1.143888  | 1.048543  |
| 103 | 6 | -5.095530 | 1.914822  | -1.102033 |
| 104 | 6 | -6.854588 | 1.967366  | 1.016560  |
| 105 | 1 | -5.574022 | 0.515550  | 1.928842  |
| 106 | 6 | -6.217727 | 2.738565  | -1.144214 |
| 107 | 1 | -4.426770 | 1.914017  | -1.965906 |
| 108 | 6 | -7.110707 | 2.780068  | -0.080604 |
| 109 | 1 | -7.984201 | 3.425254  | -0.110626 |
| 110 | 6 | -2.941562 | -0.259075 | 1.453357  |
| 111 | 6 | -2.829911 | 0.758855  | 2.405072  |
| 112 | 6 | -2.338674 | -1.482401 | 1.791186  |
| 113 | 6 | -2.177539 | 0.573327  | 3.625262  |
| 114 | 1 | -3.261099 | 1.740418  | 2.196325  |
| 115 | 6 | -1.693805 | -1.678274 | 3.008430  |
| 116 | 1 | -2.382347 | -2.308092 | 1.079658  |
| 117 | 6 | -1.608390 | -0.649843 | 3.944530  |
| 118 | 1 | -1.101413 | -0.803519 | 4.895283  |
| 119 | 6 | -2.287863 | 0.590156  | -0.877530 |
| 120 | 6 | -1.430420 | -0.239197 | -1.614398 |
| 121 | 6 | -1.917153 | 1.938595  | -0.797562 |
| 122 | 6 | -0.296743 | 0.256252  | -2.255239 |
| 123 | 1 | -1.659149 | -1.302133 | -1.703598 |
| 124 | 6 | -0.775248 | 2.440005  | -1.418935 |

|     |   |           |           |           |
|-----|---|-----------|-----------|-----------|
| 125 | 1 | -2.540625 | 2.628672  | -0.226981 |
| 126 | 6 | 0.046490  | 1.602493  | -2.163136 |
| 127 | 1 | 0.936707  | 1.982596  | -2.665728 |
| 128 | 6 | -5.045265 | -2.640231 | -4.161014 |
| 129 | 6 | -6.215547 | -4.348490 | 0.416754  |
| 130 | 6 | -7.768812 | 1.956275  | 2.199474  |
| 131 | 6 | -6.410794 | 3.609177  | -2.343936 |
| 132 | 6 | -1.024309 | -2.972262 | 3.346951  |
| 133 | 6 | -2.124187 | 1.727903  | 4.572409  |
| 134 | 6 | -0.488844 | 3.906864  | -1.348454 |
| 135 | 6 | 0.596572  | -0.633771 | -3.057949 |
| 136 | 9 | -8.235921 | 0.724035  | 2.451865  |
| 137 | 9 | -7.135073 | 2.354167  | 3.313907  |
| 138 | 9 | -8.829783 | 2.755891  | 2.042150  |
| 139 | 9 | -7.606139 | 4.210702  | -2.360216 |
| 140 | 9 | -5.481058 | 4.577233  | -2.399473 |
| 141 | 9 | -6.298567 | 2.913868  | -3.485245 |
| 142 | 9 | -5.464721 | -1.498918 | -4.727280 |
| 143 | 9 | -5.837959 | -3.620986 | -4.607845 |
| 144 | 9 | -3.816290 | -2.872822 | -4.650486 |
| 145 | 9 | -6.946286 | -5.262664 | -0.231004 |
| 146 | 9 | -5.284013 | -5.013578 | 1.119608  |
| 147 | 9 | -7.017766 | -3.761659 | 1.317497  |
| 148 | 9 | 0.318315  | -2.837345 | 3.375112  |
| 149 | 9 | -1.293084 | -3.948074 | 2.471697  |
| 150 | 9 | -1.377665 | -3.412972 | 4.560835  |
| 151 | 9 | -1.327007 | 1.500609  | 5.622374  |
| 152 | 9 | -1.662402 | 2.834488  | 3.958483  |
| 153 | 9 | -3.335313 | 2.040484  | 5.049565  |
| 154 | 9 | -1.122202 | 4.583832  | -2.315306 |
| 155 | 9 | 0.822176  | 4.174173  | -1.487148 |
| 156 | 9 | -0.873829 | 4.442459  | -0.183048 |
| 157 | 9 | 0.076851  | -1.843585 | -3.275060 |
| 158 | 9 | 0.892543  | -0.098360 | -4.251907 |
| 159 | 9 | 1.783494  | -0.826227 | -2.439653 |

---

Table S6. *t*BuXPhosAu( $\eta^2$ -phenylacetylene)BF<sub>4</sub> complex **8c**.

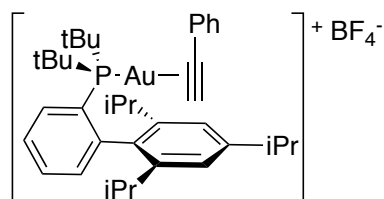

| Center Number | Atomic Number | Cartesian Coordinates (Angstroms) |           |           |
|---------------|---------------|-----------------------------------|-----------|-----------|
|               |               | X                                 | Y         | Z         |
| 1             | 15            | 0.297605                          | 2.070894  | 0.125488  |
| 2             | 6             | 0.853979                          | 2.670720  | 1.835029  |
| 3             | 6             | 1.266091                          | 2.935933  | -1.274485 |
| 4             | 79            | 0.612061                          | -0.252583 | -0.048170 |
| 5             | 6             | 3.493681                          | -1.483878 | -2.613470 |
| 6             | 6             | 4.728711                          | -1.006541 | -3.029487 |
| 7             | 6             | 5.720635                          | -0.729273 | -2.089589 |
| 8             | 6             | 5.485089                          | -0.935205 | -0.730636 |
| 9             | 6             | 4.256105                          | -1.414639 | -0.299131 |
| 10            | 6             | 3.255849                          | -1.686020 | -1.246031 |
| 11            | 1             | 2.703118                          | -1.694202 | -3.332861 |
| 12            | 1             | 4.919279                          | -0.845973 | -4.088539 |
| 13            | 1             | 6.686123                          | -0.350859 | -2.420434 |
| 14            | 1             | 6.265233                          | -0.720415 | -0.003258 |
| 15            | 1             | 4.035062                          | -1.576178 | 0.755003  |
| 16            | 6             | 1.970935                          | -2.116730 | -0.797532 |
| 17            | 6             | 0.858839                          | -2.456490 | -0.391649 |
| 18            | 1             | 0.007146                          | -3.031930 | -0.070778 |
| 19            | 6             | -1.477548                         | 2.514134  | -0.096578 |
| 20            | 6             | -1.799524                         | 3.881285  | -0.131296 |
| 21            | 6             | -2.513056                         | 1.570198  | -0.299033 |
| 22            | 6             | -3.089747                         | 4.334925  | -0.362088 |
| 23            | 1             | -1.018605                         | 4.620891  | 0.023414  |
| 24            | 6             | -3.808927                         | 2.054937  | -0.536258 |
| 25            | 6             | -4.104965                         | 3.409904  | -0.570307 |
| 26            | 1             | -3.294764                         | 5.403087  | -0.382066 |
| 27            | 1             | -4.604351                         | 1.327121  | -0.699160 |
| 28            | 1             | -5.124850                         | 3.738791  | -0.759736 |
| 29            | 6             | 1.585628                          | 4.412577  | -1.032297 |
| 30            | 1             | 2.129164                          | 4.788617  | -1.911459 |
| 31            | 1             | 0.689986                          | 5.036232  | -0.927487 |
| 32            | 1             | 2.232577                          | 4.578194  | -0.163281 |
| 33            | 6             | 2.582849                          | 2.177015  | -1.483906 |
| 34            | 1             | 3.211055                          | 2.148173  | -0.585981 |
| 35            | 1             | 2.409193                          | 1.140576  | -1.807853 |
| 36            | 1             | 3.155220                          | 2.682752  | -2.275789 |
| 37            | 6             | 0.449967                          | 2.819334  | -2.561195 |

|    |   |           |           |           |
|----|---|-----------|-----------|-----------|
| 38 | 1 | 1.054074  | 3.209837  | -3.393197 |
| 39 | 1 | 0.205833  | 1.775663  | -2.795180 |
| 40 | 1 | -0.482925 | 3.396405  | -2.526963 |
| 41 | 6 | 0.427422  | 4.094528  | 2.185138  |
| 42 | 1 | 0.823621  | 4.330665  | 3.183518  |
| 43 | 1 | 0.819903  | 4.849409  | 1.493600  |
| 44 | 1 | -0.663841 | 4.195391  | 2.236352  |
| 45 | 6 | 2.375208  | 2.542887  | 1.932558  |
| 46 | 1 | 2.663236  | 2.705885  | 2.981782  |
| 47 | 1 | 2.724284  | 1.540173  | 1.656804  |
| 48 | 1 | 2.903936  | 3.293902  | 1.333024  |
| 49 | 6 | 0.218622  | 1.714701  | 2.844422  |
| 50 | 1 | 0.563391  | 0.681128  | 2.712676  |
| 51 | 1 | 0.501643  | 2.036582  | 3.857993  |
| 52 | 1 | -0.877662 | 1.738006  | 2.788040  |
| 53 | 6 | -2.412925 | 0.071017  | -0.289020 |
| 54 | 6 | -2.272682 | -0.634910 | -1.504103 |
| 55 | 6 | -2.690626 | -0.641832 | 0.900900  |
| 56 | 6 | -2.393595 | -2.026590 | -1.504663 |
| 57 | 6 | -2.770651 | -2.033125 | 0.850161  |
| 58 | 6 | -2.635103 | -2.748324 | -0.339839 |
| 59 | 1 | -2.294445 | -2.559116 | -2.451664 |
| 60 | 1 | -2.982030 | -2.586965 | 1.767616  |
| 61 | 6 | -3.015586 | 0.063724  | 2.203110  |
| 62 | 1 | -2.673269 | 1.106233  | 2.120013  |
| 63 | 6 | -2.835628 | -4.248729 | -0.334158 |
| 64 | 1 | -2.436603 | -4.624836 | 0.623308  |
| 65 | 6 | -2.122869 | -4.980744 | -1.464334 |
| 66 | 1 | -1.052113 | -4.739551 | -1.513075 |
| 67 | 1 | -2.216381 | -6.065586 | -1.328187 |
| 68 | 1 | -2.565339 | -4.739537 | -2.441387 |
| 69 | 6 | -4.332846 | -4.562766 | -0.372049 |
| 70 | 1 | -4.508523 | -5.645838 | -0.324513 |
| 71 | 1 | -4.866611 | -4.091122 | 0.463225  |
| 72 | 1 | -4.772735 | -4.187293 | -1.308012 |
| 73 | 6 | -2.338606 | -0.561105 | 3.420752  |
| 74 | 1 | -1.265819 | -0.728248 | 3.261510  |
| 75 | 1 | -2.463993 | 0.094983  | 4.293221  |
| 76 | 1 | -2.794678 | -1.526954 | 3.680238  |
| 77 | 6 | -4.531399 | 0.106381  | 2.410091  |
| 78 | 1 | -4.941353 | -0.911553 | 2.481503  |
| 79 | 1 | -4.777905 | 0.633992  | 3.341631  |
| 80 | 1 | -5.042967 | 0.617956  | 1.584115  |
| 81 | 6 | -2.050059 | 0.069316  | -2.827597 |
| 82 | 1 | -1.861130 | 1.133211  | -2.621254 |
| 83 | 6 | -0.838562 | -0.480896 | -3.579446 |
| 84 | 1 | -0.993443 | -1.523122 | -3.891718 |
| 85 | 1 | -0.649057 | 0.108670  | -4.487368 |
| 86 | 1 | 0.068573  | -0.454264 | -2.955267 |
| 87 | 6 | -3.301715 | -0.007466 | -3.701619 |

|    |   |           |           |           |
|----|---|-----------|-----------|-----------|
| 88 | 1 | -3.147874 | 0.532025  | -4.645987 |
| 89 | 1 | -3.547276 | -1.050248 | -3.947802 |
| 90 | 1 | -4.172599 | 0.430706  | -3.196619 |
| 91 | 5 | 2.089686  | -1.750394 | 2.933176  |
| 92 | 9 | 2.189244  | -1.958502 | 4.299429  |
| 93 | 9 | 0.723024  | -1.681238 | 2.567884  |
| 94 | 9 | 2.705076  | -0.538250 | 2.584078  |
| 95 | 9 | 2.704682  | -2.789610 | 2.232308  |

---
